# Supplementary material for: Feedback loops mediating warming effects on complexity, instability and predictability of phytoplankton biomass dynamics in globally distributed lakes
Source: Research Square preprint supplement (doi:10.21203/rs.3.rs-6607784/v1), 2025-06-04
Supplement: Supplementary file 1 [file 84639ded7e77fa1fe9316978.docx]

**Feedback loops mediating warming effects on complexity, instability and predictability of phytoplankton biomass dynamics in globally distributed lakes**

Hui Fu1*, Guojun Cai1, Qian Zhu1, Yuting Zhang1, Chaoyuan Yang1, Te Cao2*, Erik Jeppesen3,4,5, Liselotte Sander Johansson3, Martin Søndergaard3,4, Mark O. Gessner6,7, Stella A. Berger6, Judit Padisák8,9, Ryuichiro Shinohara10, Aiping Wu1, Youzhi Li1, Huanyao Liu1,Guixiang Yuan1*

1Hunan Provincial Key Laboratory of Rural Ecosystem Health in Dongting Lake Area, College of Environments & Ecology, Hunan Agricultural University, Changsha, 410128, P. R. China

2Erhai Plateau lake ecosystem research station, Institute of Hydrobiology, Chinese Academy of Sciences, Wuhan, 430061, P. R. China

3Department of Ecoscience and Centre for Water Technology (WATEC), Aarhus University, Aarhus, 8000, Denmark

4Sino-Danish Centre for Education and Research (SDC), University of Chinese Academy of Sciences, Beijing, 100049, P. R. China

5Institute for Ecological Research and Pollution Control of Plateau Lakes, School of Ecology and Environmental Science, Yunnan University, Kunming, 650091, P. R. China

6Department of Plankton and Microbial Ecology, Leibniz Institute of Freshwater Ecology and Inland Fisheries (IGB), Zur alten Fischerhütte 2, 16775 Stechlin, Germany

7Institute of Ecology, Berlin Institute of Technology (TU Berlin), 10587 Berlin, Germany.

8Research Group of Limnology, Centre of Natural Sciences, University of Pannonia, Egyetem u. 10, 8200 Veszprém, Hungary

9HUN-REN-PE Limnoecology Research Group, Egyetem u. 10, 8200 Veszprém, Hungary

10National Institute for Environmental Studies, 16-2 Onogawa, Tsukuba, Ibaraki, 305-8506, Japan

***Corresponding author.** Email: (Hui Fu) [huifu367@163.com](mailto:huifu367@163.com),

(Te Cao) [caote@ihb.ac.cn](mailto:caote@ihb.ac.cn) & (Guixiang Yuan) yuangx987@163.com

**Table of contents**

**Supplementary Methods**

**Supplementary Tables 1-7**

**Supplementary Figures 1-26**

## **Supplementary Methods**

Data collection

We compiled data on lake phytoplankton abundance and physico-chemical variables for 830 sites within 391 lakes from a wide variety of research institutes across Asia, Europe, North and South America and Oceania (Supplementary Data). The data were accessed directly through online data portals (367 lakes) or obtained via data requests (24 lakes) from 34 data sources.

The datasets on Lake Geneva and Lake Annecy were obtained from the Observatory on LAkes (OLA) (<https://si-ola.inrae.fr/si_lacs/login.jsf>). Sampling was conducted monthly during the winter period and bimonthly during the rest of the year[1]. Data on Lake Champlain were obtained from the Lake Champlain Long-term Monitoring Project of the Agency of Natural Resources of Vermont, USA (<https://dec.vermont.gov/watershed/lakes-ponds/monitor>). Data on 20 lakes in Denmark were obtained from the Danish **National** Monitoring **and Assessment P**rogramme for the Aquatic **and Terrestrial** Environments (NOVANA). Datasets on Lake Taihu and Lake Poyang were obtained from the Chinese Ecosystem Science Data Center, National Science & Technology Infrastructure of China. (<https://rs.cern.ac.cn>). Datasets on eight lakes in Florida were downloaded from St. Johns River Water Management District, Florida, USA (<https://www.sjrwmd.com/data/water-quality/>). Datasets on Lake Kasumigaura[2], Biwa, Mashu and Mika in Japan were obtained from the National Institute for Environmental Studies, Japan (<https://db.cger.nies.go.jp/gem/>). Datasets on 28 lakes in New York state, USA, were derived from a public publication dataset provided by Leach et al.[3]. Datasets on 13 north temperate lakes were supplied by the North Temperate Lakes Long-Term Ecological Research (NTL-LTER) program, Environmental Data Initiative[4]. Datasets on Lake Peipsi were downloaded from Keskkonnaamet, Estonia (<https://kese.envir.ee/kese/listParameterValueNew.action?backAction=menu>). Datasets on Lake Stechlin were provided by the Leibniz Institute of Freshwater Ecology and Inland Fisheries (IGB), Germany. Datasets on Lake Vättern and Vänern in Sweden were from the Department of Aquatic Sciences and Assessment, Swedish University of Agricultural Sciences (SLU), Sweden (<http://webstar.vatten.slu.se/db.html>). Datasets on the five Great Lakes in North America were downloaded from the Great Lakes Environmental Database Query System (GLENDA) in Central Data Exchange (CDX, <https://cdx.epa.gov/>) provided by the Environmental Protection Agency (EPA), USA. Datasets on Lake Markermeer and Ijsselmeer in The Netherlands were downloaded from the website of Ministerie van Infrastructuur en Waterstaat, The Netherlands (<https://waterinfo.rws.nl/#/nav/index>). Data on a total of 41 lakes and ponds in Rhode Island was supplied by URI Watershed Watch, University of Rhode Island, USA (<https://web.uri.edu/watershedwatch/data/historic-data/>). Datasets on Cheney Reservoir[5] in the USA and Lake Kinneret[6] in Israel were obtained from the Global Evaluation of the Impacts of Storms on freshwater Habitat and Structure of phytoplankton Assemblages (GEISHA, <https://www.uvm.edu/femc/data/archive/project/geisha-stormblitzfr/dataset>), provided by The Forest Ecosystem Monitoring Cooperative. Datasets on Lake Washington and Lake Sammamish were downloaded from the government’s website of King County (<https://green2.kingcounty.gov/lakes/>), WA, USA. Datasets on 149 Lakes in New Zealand were downloaded from Land Air Water Aotearo (LAWA, [https://www.lawa.org.nz/download-data/#download-data-lakes](https://www.lawa.org.nz/download-data/%23download-data-lakes)), New Zealand. Datasets on Blelham Tarn[7], Bassenthwaite Lake[8], Derwent Water[9], Esthwaite Water[10], Grasmere Lake[11] and Lake Windermere[12, 13] were supplied by the Environmental Information Data Centre, UK Centre for Ecology & Hydrology, UK (<https://eidc.ac.uk/>). Datasets on Lake Erken[14] in Sweden were obtained from the Swedish Infrastructure for Ecosystem Science (SITES, <https://www.fieldsites.se/>). Data on Lake Inba in Japan were downloaded from the governmental website of Chiba Prefectural Government, Japan (<http://www.pref.chiba.lg.jp/suiho/kasentou/koukyouyousui/index.html>). Datasets on Lake Maggiore in Italy, composed of multiple datasets[15-17], were obtained from the B2SHARE website (<https://b2share.eudat.eu/>), provided by the EUDAT Collaborative Data Infrastructure (<https://eudat.eu/>). These datasets are also listed in DEIMS (<https://deims.org/>) as Ghiffa station. Datasets of 27 lakes near Toolik[18-21] were provided by the Arctic Long-term Ecological Research program (ARC LTER, <https://arc-lter.ecosystems.mbl.edu/lakes-data>), USA. Datasets on Lake Oneida[22] were downloaded from the Knowledge Network for Biocomplexity (KNB, <https://knb.ecoinformatics.org/view/kgordon.35.117>). Datasets on 62 reservoirs and lakes in Taiwan, China were obtained from the website of the management department (<https://data.moenv.gov.tw/dataset>). Datasets on seven floodplain lakes from Amazonia in Brazil were derived from a peer-reviewed literature dataset by Roque et al.[23]. The sampling methods for all data have been described in the respective metadata.

## **References**

1 Rimet, F. *et al.* The Observatory on LAkes (OLA) database: Sixty years of environmental data accessible to the public: The Observatory on LAkes (OLA) database. *Journal of Limnology* **79**, doi:<https://doi.org/10.4081/jlimnol.2020.1944> (2020).

2 Studies, N. I. f. E. Lake Kasumigaura Database, National Institute for Environmental Studies, Japan. (2016). <<https://db.cger.nies.go.jp/gem/moni-e/inter/GEMS/database/kasumi/index.html> (Accessed on 2022-12-21)>.

3 Leach, T. H. *et al.* Long-term dataset on aquatic responses to concurrent climate change and recovery from acidification. *Scientific Data* **5**, 180059, doi:<https://doi.org/10.1038/sdata.2018.59> (2018).

4 Magnuson, J. J., Carpenter, S. R. & Stanley, E. H. North Temperate Lakes LTER: Chemical Limnology of Primary Study Lakes: Major Ions 1981 - current ver 38. *Environmental Data Initiative*, doi:<https://doi.org/10.6073/pasta/bb563f16c7338fdb3ddf82057ef43cc6> (2023) (Accessed on 2024-03-10)>.

5 Stockwell, J., Brentrup, J., Doubek, J. & Graham, J. Cheney Reservoir raw nutrient data, 2006-2016. *FRB Centre for the Synthesis and Analysis of Biodiversity and USGS John Wesley Powell Center Global Evaluation of the Impacts of Storms on freshwater Habitat and structure of phytoplankton Assemblages (GEISHA) Working Group* (2020). <<https://www.uvm.edu/femc/data/archive/project/geisha-stormblitzfr/dataset/cheney-raw-nutrient-data> (Accessed on 2023-06-21)>.

6 Beei-Shlevin, Y., Stockwell, J., Brentrup, J., Bruel, R. & Doubek, J. Lake Kinneret raw nutrient data, 1996-2012. . *FRB Centre for the Synthesis and Analysis of Biodiversity and USGS John Wesley Powell Center Global Evaluation of the Impacts of Storms on freshwater Habitat and structure of phytoplankton Assemblages (GEISHA) Working Group* (2021). <<https://www.uvm.edu/femc/data/archive/project/geisha-stormblitzfr/dataset/kinneret-raw-nutrient-data> (Access on 2023-06-25)>.

7 Maberly, S. C. *et al.* Surface temperature, surface oxygen, water clarity, water chemistry and phytoplankton chlorophyll a data from Blelham Tarn, 1945 to 2013. doi:<https://doi.org/10.5285/393a5946-8a22-4350-80f3-a60d753beb00> (2017).

8 Maberly, S. C. *et al.* Surface temperature, surface oxygen, water clarity, water chemistry and phytoplankton chlorophyll a data from Bassenthwaite Lake, 1990 to 2013. doi:<https://doi.org/10.5285/91d763f2-978d-4891-b3c6-f41d29b45d55> (2017).

9 Maberly, S. C. *et al.* Surface temperature, surface oxygen, water clarity, water chemistry and phytoplankton chlorophyll a data from Derwent Water, 1990 to 2013. doi:<https://doi.org/10.5285/106844ff-7b4c-45c3-8b4c-7cfb4a4b953b> (2017).

10 Maberly, S. C. *et al.* Surface temperature, surface oxygen, water clarity, water chemistry and phytoplankton chlorophyll a data from Esthwaite Water, 1945 to 2013. doi:<https://doi.org/10.5285/87360d1a-85d9-4a4e-b9ac-e315977a52d3> (2017).

11 Maberly, S. C. *et al.* Surface temperature, surface oxygen, water clarity, water chemistry and phytoplankton chlorophyll a data from Grasmere, 1968 to 2013. doi:<https://doi.org/10.5285/b891c50a-1f77-48b2-9c41-7cc0e8993c50> (2017).

12 Maberly, S. C. *et al.* Surface temperature, surface oxygen, water clarity, water chemistry and phytoplankton chlorophyll a data from Windermere North Basin, 1945 to 2013. doi:<https://doi.org/10.5285/f385b60a-2a6b-432e-aadd-a9690415a0ca> (2017).

13 Maberly, S. C. *et al.* Surface temperature, surface oxygen, water clarity, water chemistry and phytoplankton chlorophyll a data from Windermere South Basin, 1945 to 2013. doi:<https://doi.org/10.5285/e3c4d368-215d-49b2-8e12-74c99c4c3a9d> (2017).

14 Laboratory, E. Chemical variables - lake from Erken, deepest point, 2006-02-16–2013-12-17 *Swedish Infrastructure for Ecosystem Science (SITES)* (2023). <<https://hdl.handle.net/11676.1/E3q_b3k_gSBE58AEIiaqzXFn> (Accessed on 2024-06-10).

15 Rogora, M. Water chemistry_Lago Maggiore_Italy. doi:<https://doi.org/10.23728/B2SHARE.FE41F237792B48F19D53DB5258C1BE96> (2024). <<https://b2share.eudat.eu/> (Access on 2024-06-12).

16 Lami, A., Kamburska, L., Austoni, M. & Rogora, M. Chlorophyll-a_Lake_Maggiore_Italy. doi:<https://doi.org/10.23728/B2SHARE.474854262DD5494E93914523B6301ADF> (2023) (Access on 2024-02-15)>.

17 Rogora, M. Transparency (Secchi depth) of Lake Maggiore, Ghiffa station, 1988-2021 doi:<https://doi.org/10.23728/B2SHARE.A61C4B9165D745F4A454883ADEE15FFF> (2024). <<https://b2share.eudat.eu/> (Access on 2024-05-16)>.

18 Giblin, A. & George Kling. Water chemistry data for various lakes near Toolik Research Station, Arctic LTER. Summer 1983 to 1989. doi:<https://doi.org/10.6073/pasta/7d30ceaaf64ac5e6bf6a336c17e3ffb1> (2016).

19 Giblin, A. & Kling, G. Water chemistry data for various lakes near Toolik Research Station, Arctic LTER. Summer 1990 to 1999. doi:<https://doi.org/10.6073/pasta/8db9af4d3fc6f66b200c26cc0256b7f8> (2016).

20 Giblin, A. & Kling, G. Water chemistry data for various lakes near Toolik Research Station, Arctic LTER. Summer 2000 to 2009. doi:<https://doi.org/10.6073/pasta/c964a186ed5a58270602ea44f8c3927b> (2016).

21 Giblin, A. & George Kling. Water chemistry data for various lakes near Toolik Research Station, Arctic LTER. Summer 2010 to 2021. doi:<https://doi.org/10.6073/pasta/35879c60c852eeef54f09e4be8b41042> (2022).

22 Rudstam, L. G. & Almeida, Z. Limnological data and depth profile from Oneida Lake, New York, 1975 to present. *Knowledge Network for Biocomplexity*, doi:kgordon.35.117 (2008). <<https://knb.ecoinformatics.org/view/kgordon.35.117> (Access on 2023-08-19)>.

23 Roque, D. D. *et al.* Surface water quality in Amazonian Floodplain Lakes, data set of the Lago Grande de Curuai Floodplain Lake, Pará-Brazil. *Geoscience Data Journal* **11**, 252-266, doi:<https://doi.org/10.1002/gdj3.207> (2024).

**Supplementary Table 1 Number of time series for seven tested environmental variables**. Chl *a* is chlorophyll-*a* concentration, NH4+ is ammonium, NOx- is nitrate plus nitrite, PO43- is phosphate, SD is Secchi depth, and Si is silica. Semiannually indicates two sampling dates per year, one each during the warm (May to October) and cold (December to April) season on the northern hemisphere, and vice versa on the southern hemisphere. Bi-weekly means one sampling every 14 days.

| Variable | Temporal resolution of sampling | | | | | |
| --- | --- | --- | --- | --- | --- | --- |
| Bi-weekly | Monthly | Seasonally | Semiannually | Yearly | Total |
| Chl *a* | 28 | 177 | 331 | 366 | 165 | 1067 |
| NH4+ | 17 | 96 | 242 | 268 | 82 | 705 |
| NOx- | 26 | 158 | 336 | 330 | 100 | 950 |
| pH | 27 | 200 | 352 | 377 | 155 | 1111 |
| PO43- | 20 | 102 | 268 | 240 | 60 | 690 |
| SD | 26 | 157 | 298 | 278 | 109 | 868 |
| Si | 23 | 60 | 69 | 69 | 10 | 231 |
| Total | 167 | 950 | 1896 | 1928 | 681 | 5622 |

**Supplementary Table 2** **Number (N.case) and percentage (Perc) of causal linkages estimated by convergent cross mapping (ccmLink) for convergent (Conv) and non-convergent (nonConv) cases.** Chl *a* is the chlorophyll-*a* concentration, NH4+ is ammonium, NOx- is nitrate plus nitrite, PO43- is phosphate, SD is Secchi depth, and Si is silica.

| ccmLink | N.case | N.nonConv | N.Conv | Perc_Conv | Perc_nonConv |
| --- | --- | --- | --- | --- | --- |
| Chl *a* → NH4+ | 595 | 364 | 231 | 38.8 | 61.2 |
| Chl *a* → NOx- | 801 | 492 | 309 | 38.6 | 61.4 |
| Chl *a* → pH | 915 | 514 | 401 | 43.8 | 56.2 |
| Chl *a* → PO43- | 621 | 357 | 264 | 42.5 | 57.5 |
| Chl *a* → SD | 782 | 366 | 416 | 53.2 | 46.8 |
| Chl *a* → Si | 141 | 54 | 87 | 61.7 | 38.3 |
| NH4+ → Chl *a* | 595 | 369 | 226 | 38.0 | 62.0 |
| NH4+ → NOx- | 566 | 323 | 243 | 42.9 | 57.1 |
| NH4+ → pH | 616 | 390 | 226 | 36.7 | 63.3 |
| NH4+ → PO43- | 467 | 298 | 169 | 36.2 | 63.8 |
| NH4+ →SD | 541 | 334 | 207 | 38.3 | 61.7 |
| NH4+ →Si | 171 | 77 | 94 | 55.0 | 45.0 |
| NOx- → Chl *a* | 801 | 481 | 320 | 40.0 | 60.0 |
| NOx- → NH4+ | 566 | 304 | 262 | 46.3 | 53.7 |
| NOx- → pH | 835 | 505 | 330 | 39.5 | 60.5 |
| NOx- → PO43- | 612 | 324 | 288 | 47.1 | 52.9 |
| NOx- → SD | 636 | 366 | 270 | 42.5 | 57.5 |
| NOx- → Si | 182 | 67 | 115 | 63.2 | 36.8 |
| pH → Chl *a* | 915 | 492 | 423 | 46.2 | 53.8 |
| pH → NH4+ | 616 | 377 | 239 | 38.8 | 61.2 |
| pH → NOx- | 835 | 515 | 320 | 38.3 | 61.7 |
| pH → PO43- | 593 | 395 | 198 | 33.4 | 66.6 |
| pH → SD | 765 | 465 | 300 | 39.2 | 60.8 |
| pH → Si | 205 | 76 | 129 | 62.9 | 37.1 |
| PO43- →Chl *a* | 621 | 360 | 261 | 42.0 | 58.0 |
| PO43- → NH4+ | 467 | 296 | 171 | 36.6 | 63.4 |
| PO43- → NOx- | 612 | 323 | 289 | 47.2 | 52.8 |
| PO43- → pH | 593 | 378 | 215 | 36.3 | 63.7 |
| PO43- → SD | 575 | 332 | 243 | 42.3 | 57.7 |
| PO43- → Si | 118 | 44 | 74 | 62.7 | 37.3 |
| SD → Chl *a* | 782 | 377 | 405 | 51.8 | 48.2 |
| SD → NH4+ | 541 | 367 | 174 | 32.2 | 67.8 |
| SD → NOx- | 636 | 372 | 264 | 41.5 | 58.5 |
| SD → pH | 765 | 438 | 327 | 42.7 | 57.3 |
| SD → PO43- | 575 | 337 | 238 | 41.4 | 58.6 |
| SD → Si | 124 | 50 | 74 | 59.7 | 40.3 |
| Si → Chl *a* | 141 | 54 | 87 | 61.7 | 38.3 |
| Si → NH4+ | 171 | 72 | 99 | 57.9 | 42.1 |
| Si → NOx- | 182 | 55 | 127 | 69.8 | 30.2 |
| Si → pH | 205 | 80 | 125 | 61.0 | 39.0 |
| Si → PO43- | 118 | 49 | 69 | 58.5 | 41.5 |
| Si → SD | 124 | 54 | 70 | 56.5 | 43.5 |
| Total | 21722 | 12343 | 9379 | 0.4 | 0.6 |

**Supplementary Table 3** **Loop weight for each type of feedback loop associated with chl *a*.** S.D. denotes the standard deviation and C.V. the coefficient of variance.

| Loop type | Mean | Median | Maximum | Minimum | S.D. | C.V. |
| --- | --- | --- | --- | --- | --- | --- |
| Loop2 | 0.51 | 0.50 | 0.98 | 0.16 | 0.17 | 0.34 |
| Loop3 | 0.47 | 0.44 | 0.97 | 0.17 | 0.16 | 0.34 |
| Loop4 | 0.44 | 0.41 | 0.96 | 0.16 | 0.15 | 0.34 |
| Loop5 | 0.43 | 0.39 | 0.91 | 0.17 | 0.15 | 0.34 |
| Loop6 | 0.42 | 0.37 | 0.92 | 0.17 | 0.14 | 0.34 |
| Loop7 | 0.42 | 0.37 | 0.86 | 0.21 | 0.15 | 0.35 |

**Supplementary Table 4** Summary of effect library size, defined as minimum library size in a given feedback loop, for each type of feedback loop associated with chl a. S.D. denotes the standard deviation and C.V. the coefficient of variance.

| Loop type | Mean | Median | Maximum | Minimum | S.D. | C.V. |
| --- | --- | --- | --- | --- | --- | --- |
| Loop2 | 185 | 113 | 1963 | 20 | 246 | 1.33 |
| Loop3 | 241 | 191 | 1953 | 20 | 289 | 1.20 |
| Loop4 | 289 | 203 | 1932 | 30 | 312 | 1.08 |
| Loop5 | 325 | 214 | 1672 | 30 | 322 | 0.99 |
| Loop6 | 348 | 218 | 1635 | 30 | 326 | 0.94 |
| Loop7 | 358 | 218 | 1158 | 35 | 319 | 0.89 |

**Supplementary Table 5 Number (N) of phytoplankton-environment feedback loops for different loop types and maximum loop lengths.**

| Loop type | N | Maximum loop length | | | | | | |
| --- | --- | --- | --- | --- | --- | --- | --- | --- |
| 0 | 2 | 3 | 4 | 5 | 6 | 7 |
| Loop2 | 30 | 12 | 18 | 0 | 0 | 0 | 0 | 0 |
| Loop3 | 189 | 117 | 38 | 34 | 0 | 0 | 0 | 0 |
| Loop4 | 211 | 92 | 41 | 35 | 43 | 0 | 0 | 0 |
| Loop5 | 252 | 83 | 28 | 41 | 39 | 61 | 0 | 0 |
| Loop6 | 270 | 95 | 22 | 33 | 29 | 39 | 52 | 0 |
| Loop7 | 73 | 7 | 1 | 3 | 1 | 2 | 11 | 48 |

**Supplementary Table 6 Results of hierarchical Bayesian models** **regarding the effects of warming rate (℃/year), absolute latitude and mean water depth (m) on the probability of chaotic classification for chl-*a* time series.** Estimates of mean marginal posterior distribution (Post.dist), standard deviation of the estimate (S.D.), 2.5% and 97.5% credible intervals centered on the mean (CI) and proportions of the posterior distribution greater than zero are shown.

| Parameter | Predictor | Estimate | S.D. | 2.5%CI | 97.5% CI | Post.dist>0 |
| --- | --- | --- | --- | --- | --- | --- |
| 1-Chaotic,  0-Non-chaotic  (N = 381) | Intercept | -2.94 | 3.56 | -9.84 | 3.74 | 0.20 |
| Warming rate | 4.25 | 4.48 | -4.55 | 13.07 | 0.83 |
| Latitude | 0.16 | 0.94 | -1.59 | 2.03 | 0.56 |
| Mean water depth | -0.04 | 0.18 | -0.40 | 0.32 | 0.42 |
| 1-Non-chaotic and never instable  2-Non-chaotic with local instability  3-Chaotic  (N = 381) | Intercept[1] | 0.31 | 1.41 | -2.42 | 3.11 | 0.59 |
| Intercept[2] | 2.07 | 1.41 | -0.69 | 4.85 | 0.93 |
| Warming rate | 0.95 | 1.94 | -2.96 | 4.70 | 0.69 |
| Latitude | 0.18 | 0.38 | -0.54 | 0.93 | 0.69 |
| Mean water depth | 0.04 | 0.07 | -0.12 | 0.18 | 0.69 |

**Supplementary Table 7 Results of hierarchical Bayesian models regarding the effects of predictors on the probability of chaotic classification for chl-*a* time series, respectively.** Estimates of the mean marginal posterior distribution (Post.dist), standard deviation of the estimate (S.D.), 2.5% and 97.5% credible intervals centered on the mean (CI) and proportions of the posterior distribution greater than zero are shown.

| Parameter | Predictor | Estimate | S.D. | 2.5%CI | 97.5% CI | Post.dist>0 |
| --- | --- | --- | --- | --- | --- | --- |
| 1-Chaotic  0-Non-chaotic  (N = 619) | Intercept | 4.17 | 2.08 | 0.03 | 8.14 | 0.98 |
| Effect library size | -0.96 | 0.29 | -1.57 | -0.43 | <0.01 |
| Proportion of missing values | 1.51 | 2.39 | -3.42 | 5.99 | 0.75 |
| Mean loop weight | -0.29 | 1.27 | -2.81 | 2.12 | 0.41 |
| Maximum loop length | 0.10 | 0.09 | -0.08 | 0.27 | 0.87 |
| Permutation entropy | -2.31 | 1.63 | -5.54 | 0.89 | 0.08 |
| Dimensionality | -0.15 | 0.10 | -0.34 | 0.04 | 0.06 |
| 1-Non-chaotic and never instable  2-Non-chaotic with local instability  3-Chaotic  (N = 619) | Intercept[1] | -3.38 | 0.83 | -5.03 | -1.78 | 0.00 |
| Intercept[2] | -1.69 | 0.82 | -3.33 | -0.11 | 0.02 |
| Effect library size | -0.35 | 0.09 | -0.52 | -0.18 | <0.01 |
| Proportion of missing values | -0.04 | 0.86 | -1.71 | 1.64 | 0.48 |
| Mean loop weight | 0.14 | 0.46 | -0.78 | 1.09 | 0.63 |
| Maximum loop length | 0.06 | 0.03 | -0.01 | 0.12 | 0.95 |
| Permutation entropy | -1.97 | 0.71 | -3.39 | -0.59 | <0.01 |
| Dimensionality | 0.04 | 0.03 | -0.02 | 0.10 | 0.89 |


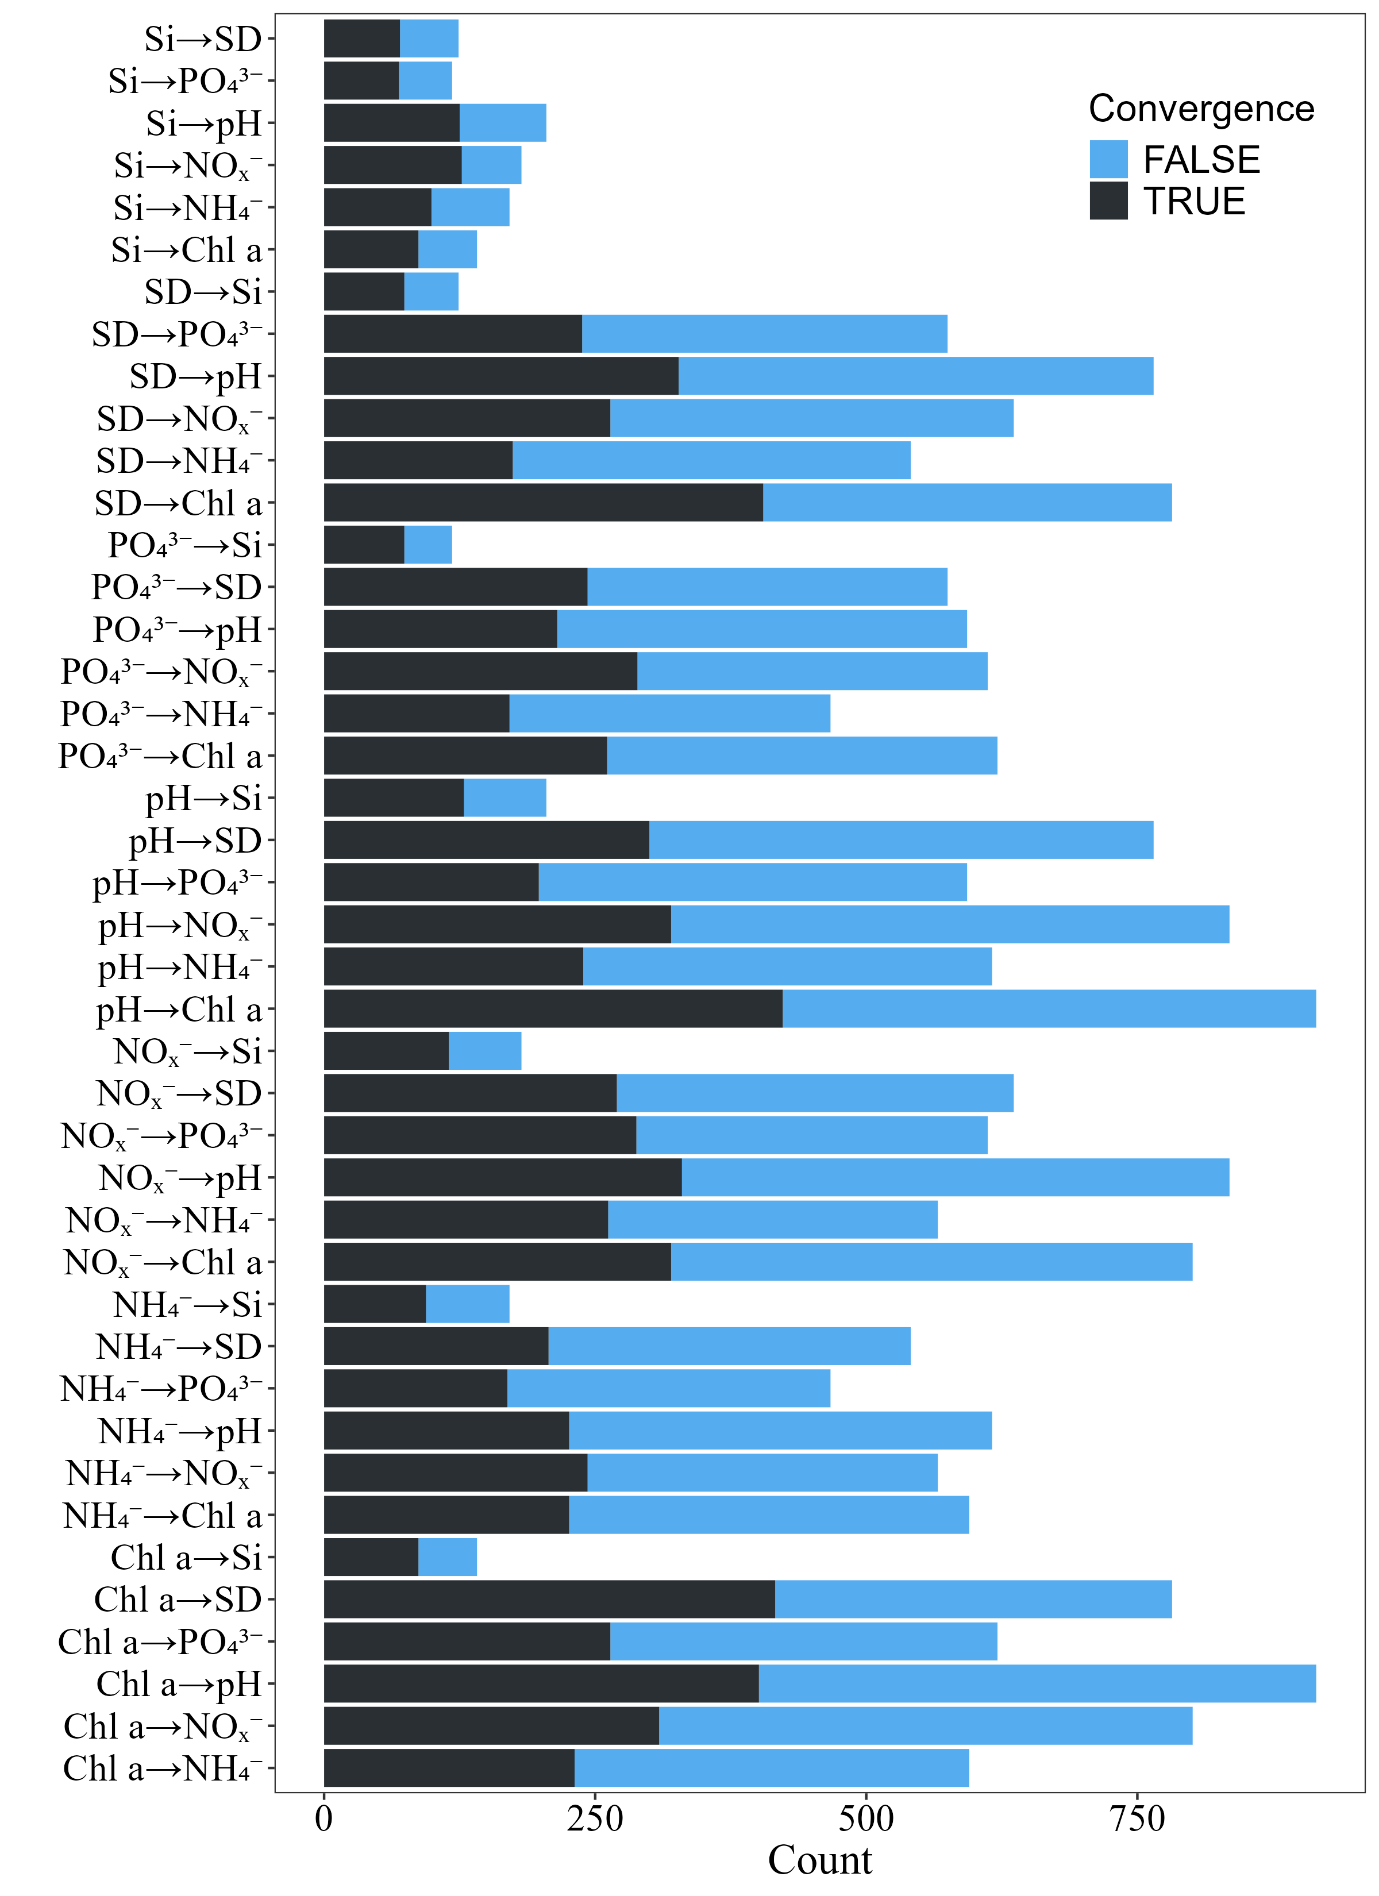


**Supplementary Figure 1** **Convergence test results for a total of 42 causal linkages estimated from convergent cross mapping.** True convergence indicates a significant causal linkage and false convergence a non-significant linkage. Chl *a* is the chlorophyll-*a* concentration, NH4+ is ammonium, NOx- is nitrate plus nitrite, PO43+ is phosphate, SD is Secchi depth, and Si is silica.


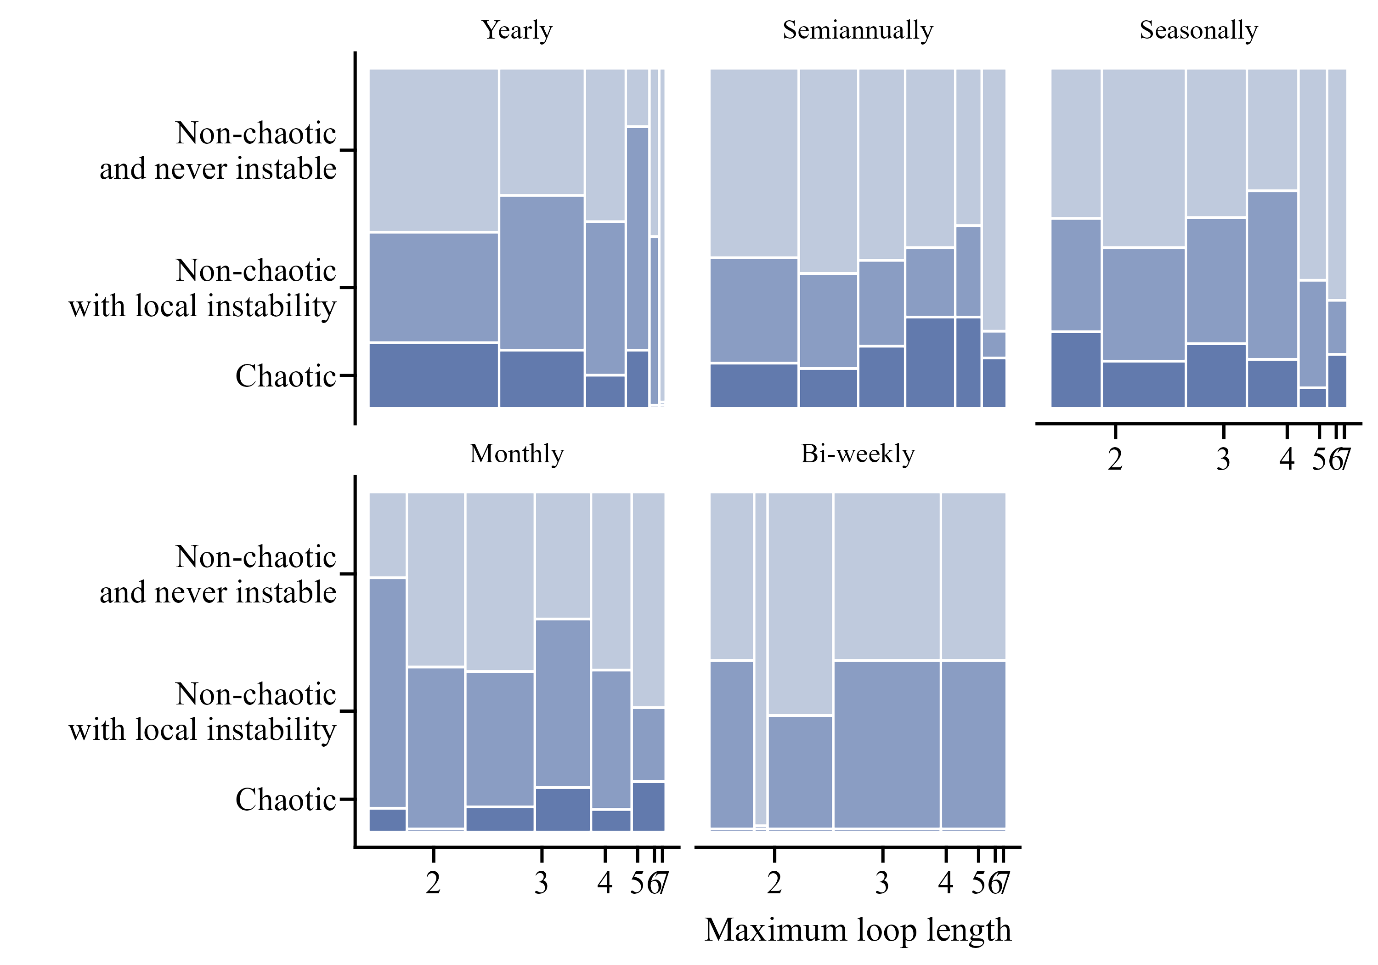


**Supplementary Figure 2** **Mosaic plot showing chaos classification of chl-*a* time series by maximum loop length at five temporal scales.** Axes show the relative frequency of each category. Chl-*a* time series were classified as chaotic if the *Lyapunov exponent* (LE) was > 0. Non-chaotic chl-*a* time series with at least one local eigenvalue > 0 were classified as ‘non-chaotic with local instability’, all other non-chaotic time series were classified as ‘non-chaotic and never instable’.


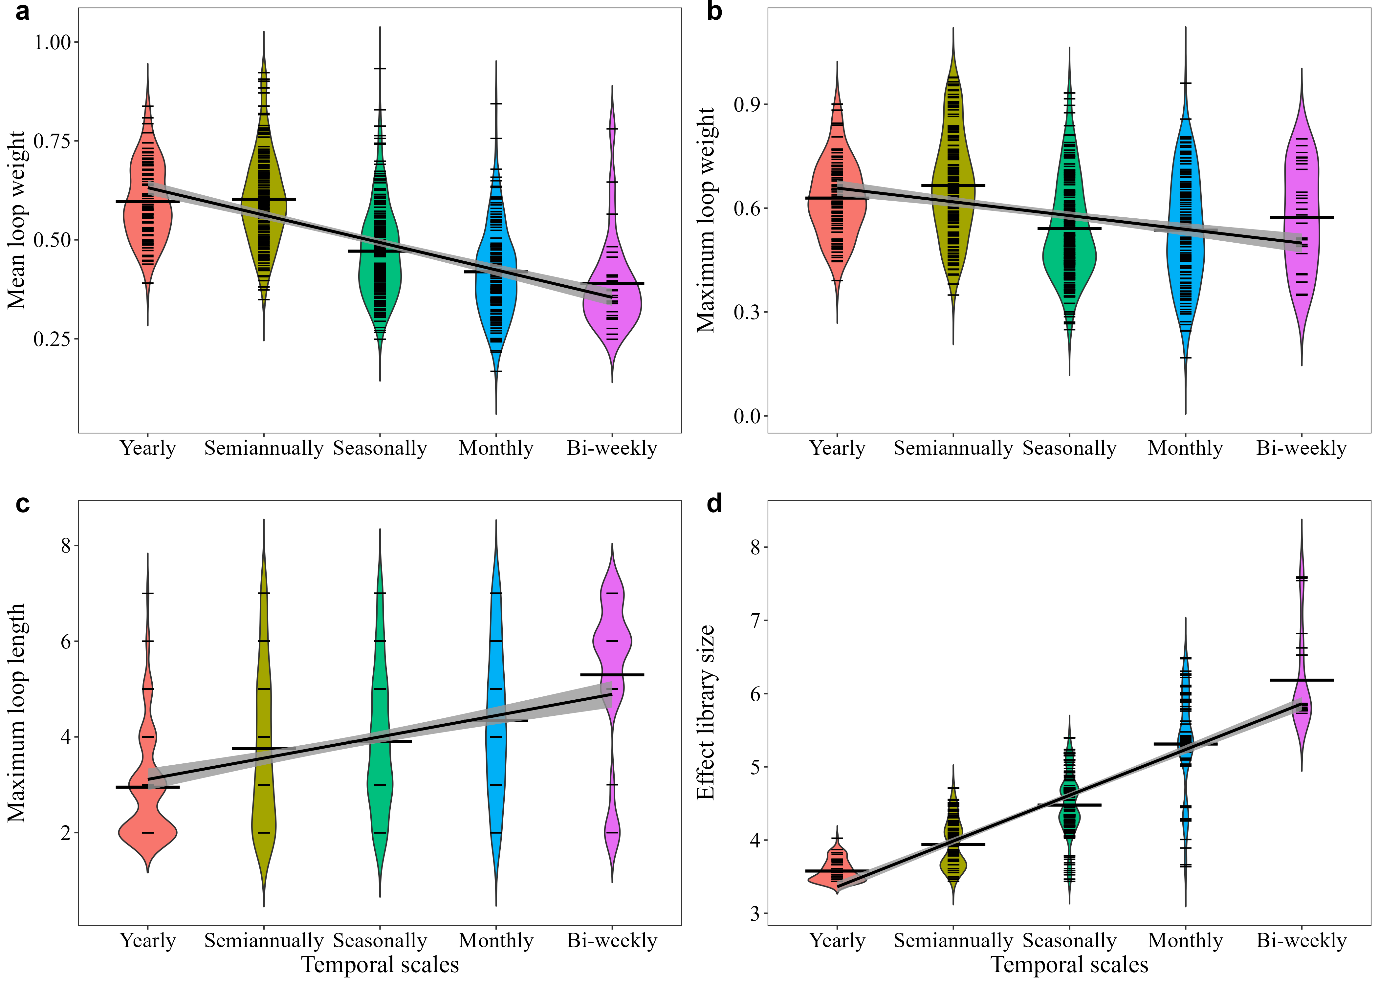


**Supplementary Figure 3** **Mean loop weight (a), maximum loop weight (b), maximum loop length (c) and effect library size (d) at five temporal scales.**


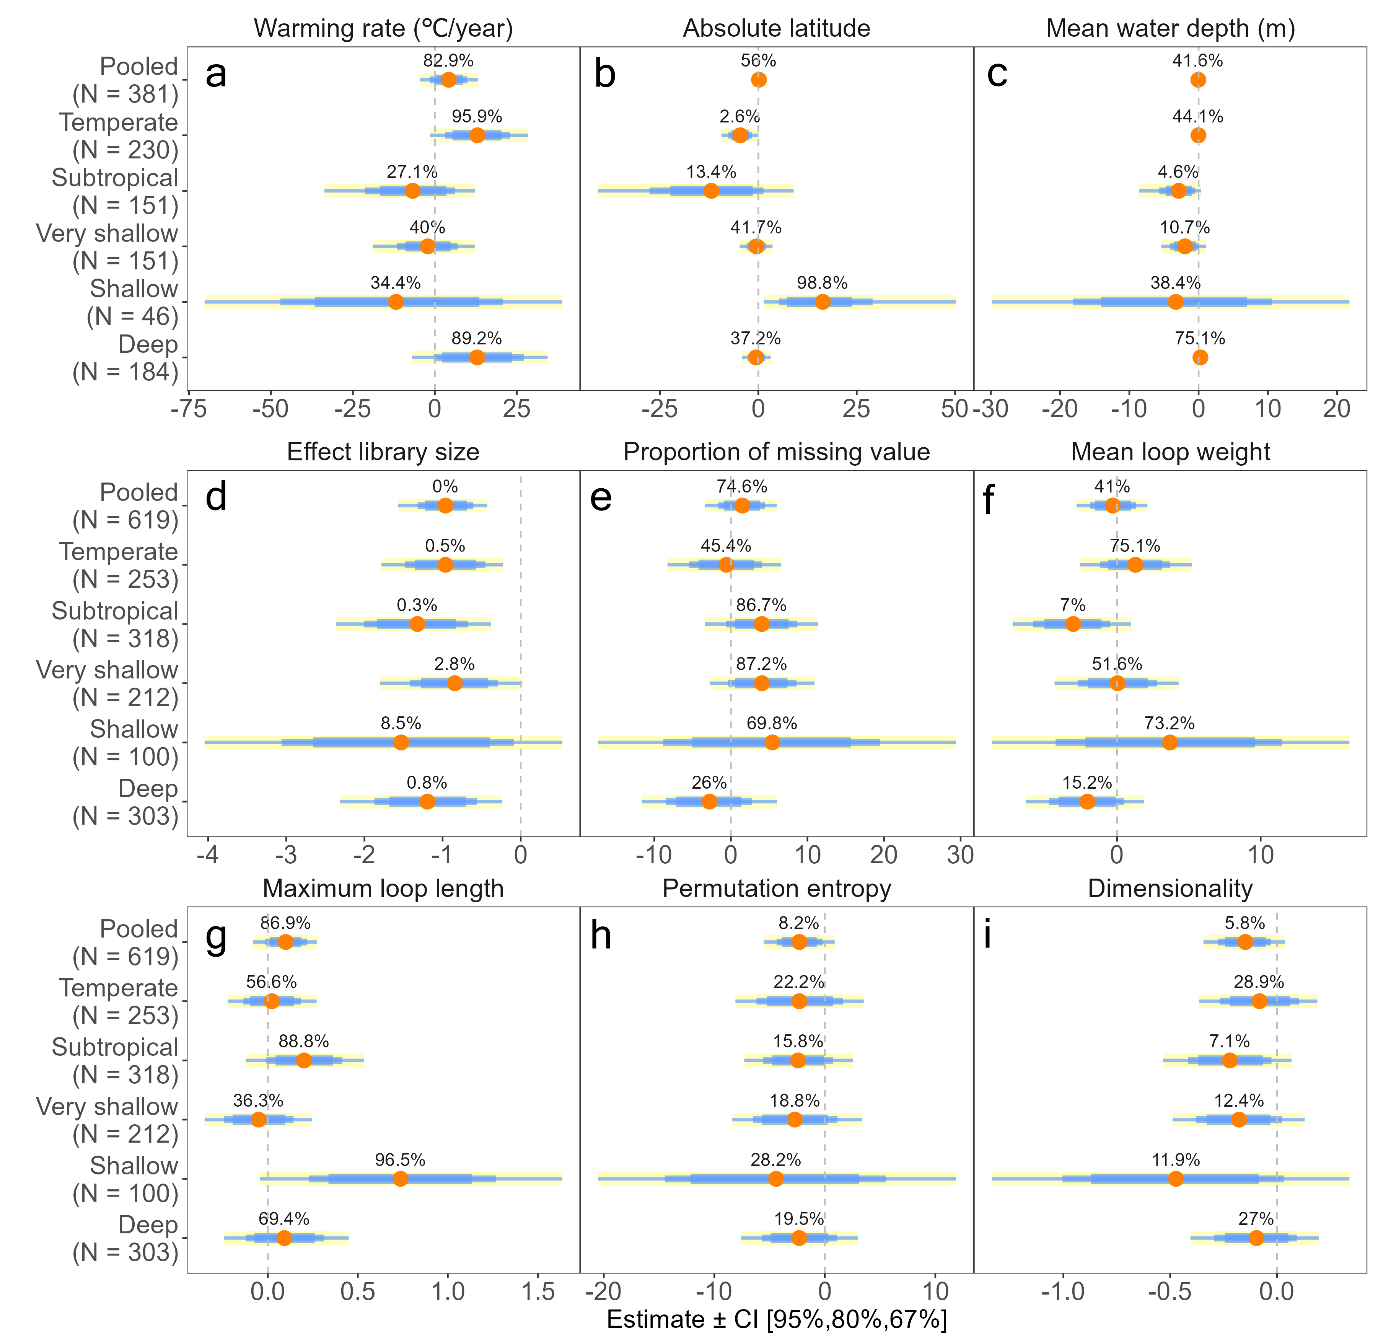


**Supplementary Figure 4 Effects of environment (a-c), effect library size (d), proportion of missing values (e), mean loop weight (f), maximum loop length (g) and dynamic complexity (h: dimensionality and i: permutation entropy) on the probability of chaotic classification (1-chaotic, 0-non-chaotic) for the chl-*a* time series.** Orange dots are marginal posterior means, bands in shades of blue show 67, 80 and 95% credible intervals centered on the mean, and numbers refer to proportions of posterior distributions greater than zero, estimated by hierarchical Bayesian models with random effects of sites nested within lakes.


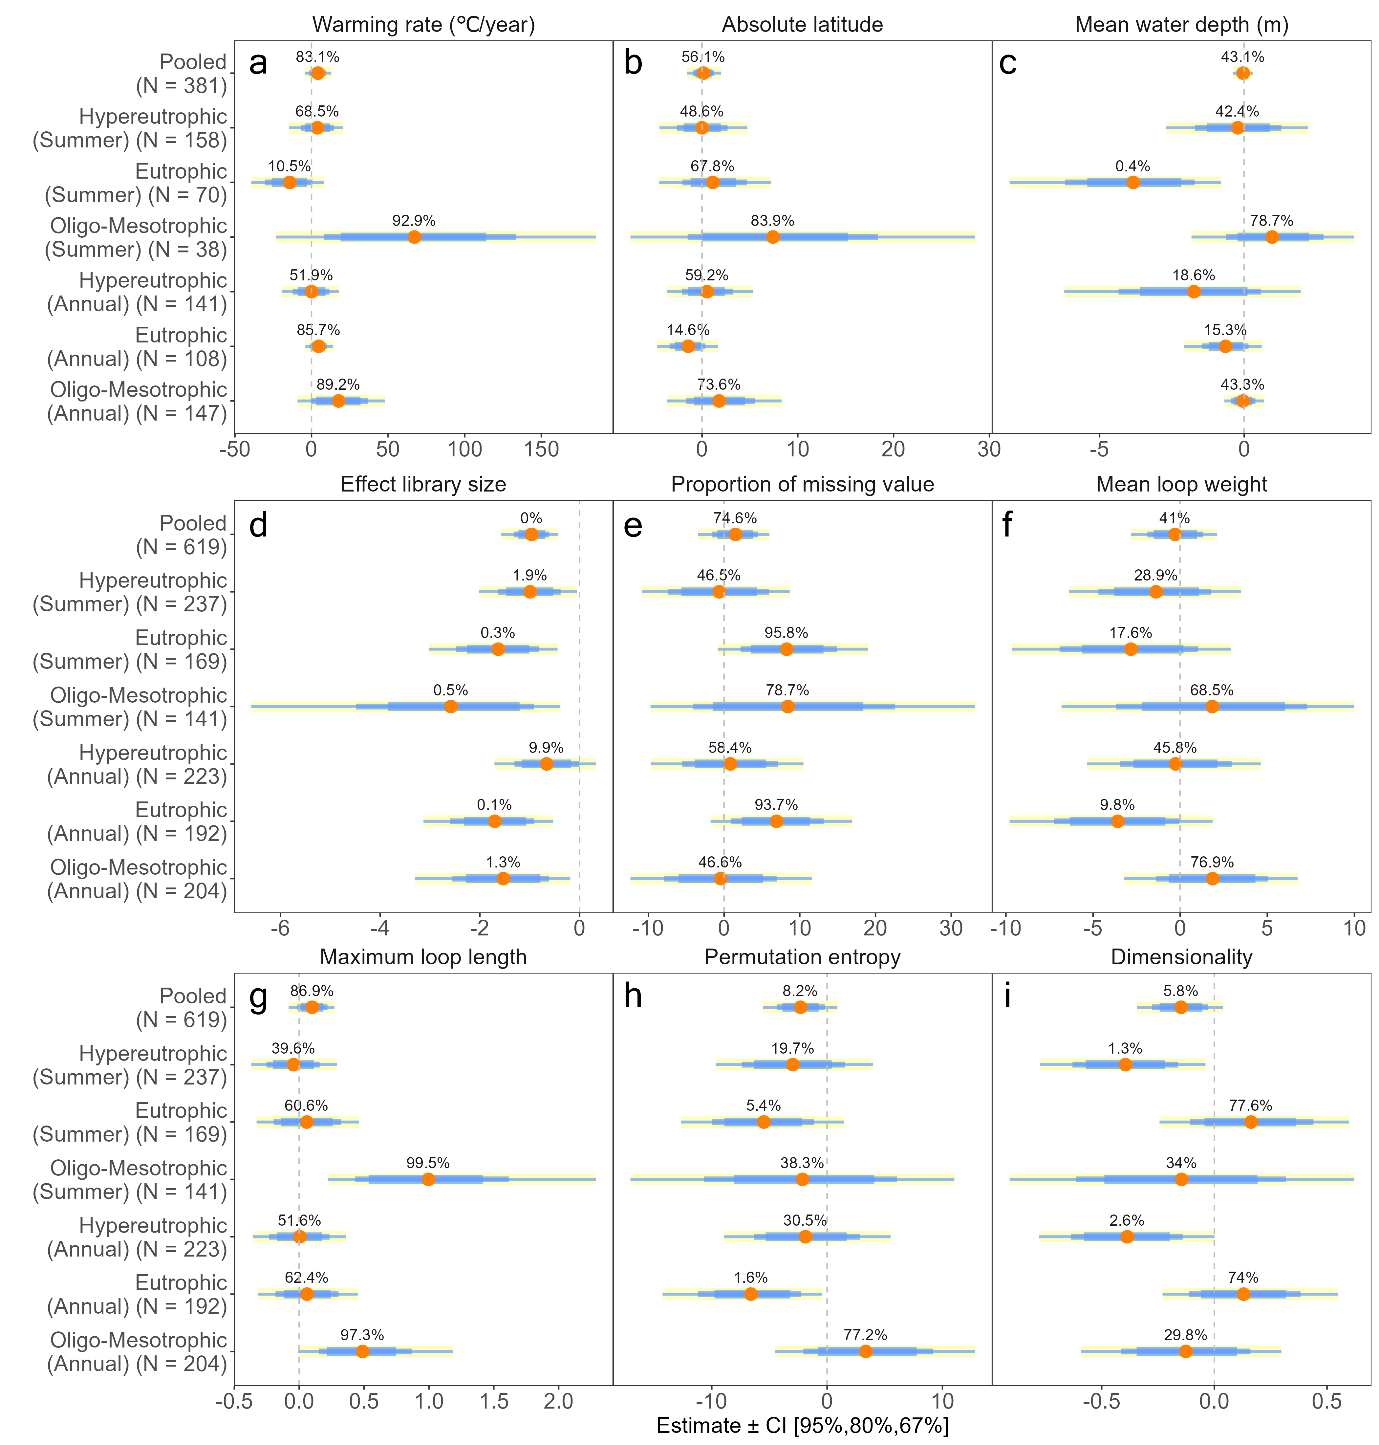


**Supplementary Figure 5 Effects of environmental conditions (a-c), effect library size (d), proportion of missing values (e), mean loop weight (f), maximum loop length (g) and dynamic complexity (h: dimensionality and i: permutation entropy) on the probability of chaotic classification (1-chaotic, 0-non-chaotic) for the chl-*a* time series across lakes differing in trophic status.** The lakes were classified as oligo-mesotrophic (chl *a* ≤ 7 μg L−1), eutrophic (7 < chl *a* ≤ 30 μg L−1) and hypereutrophic (chl *a* > 30 μg L−1) using summer mean and annual mean chl-*a* values, respectively. Orange dots are marginal posterior means, bands in green shading show 67, 80 and 95% credible intervals centered on the mean, and the numbers refer to proportions of posterior distributions greater than zero, estimated by hierarchical Bayesian models with random effects of sites nested within lakes.


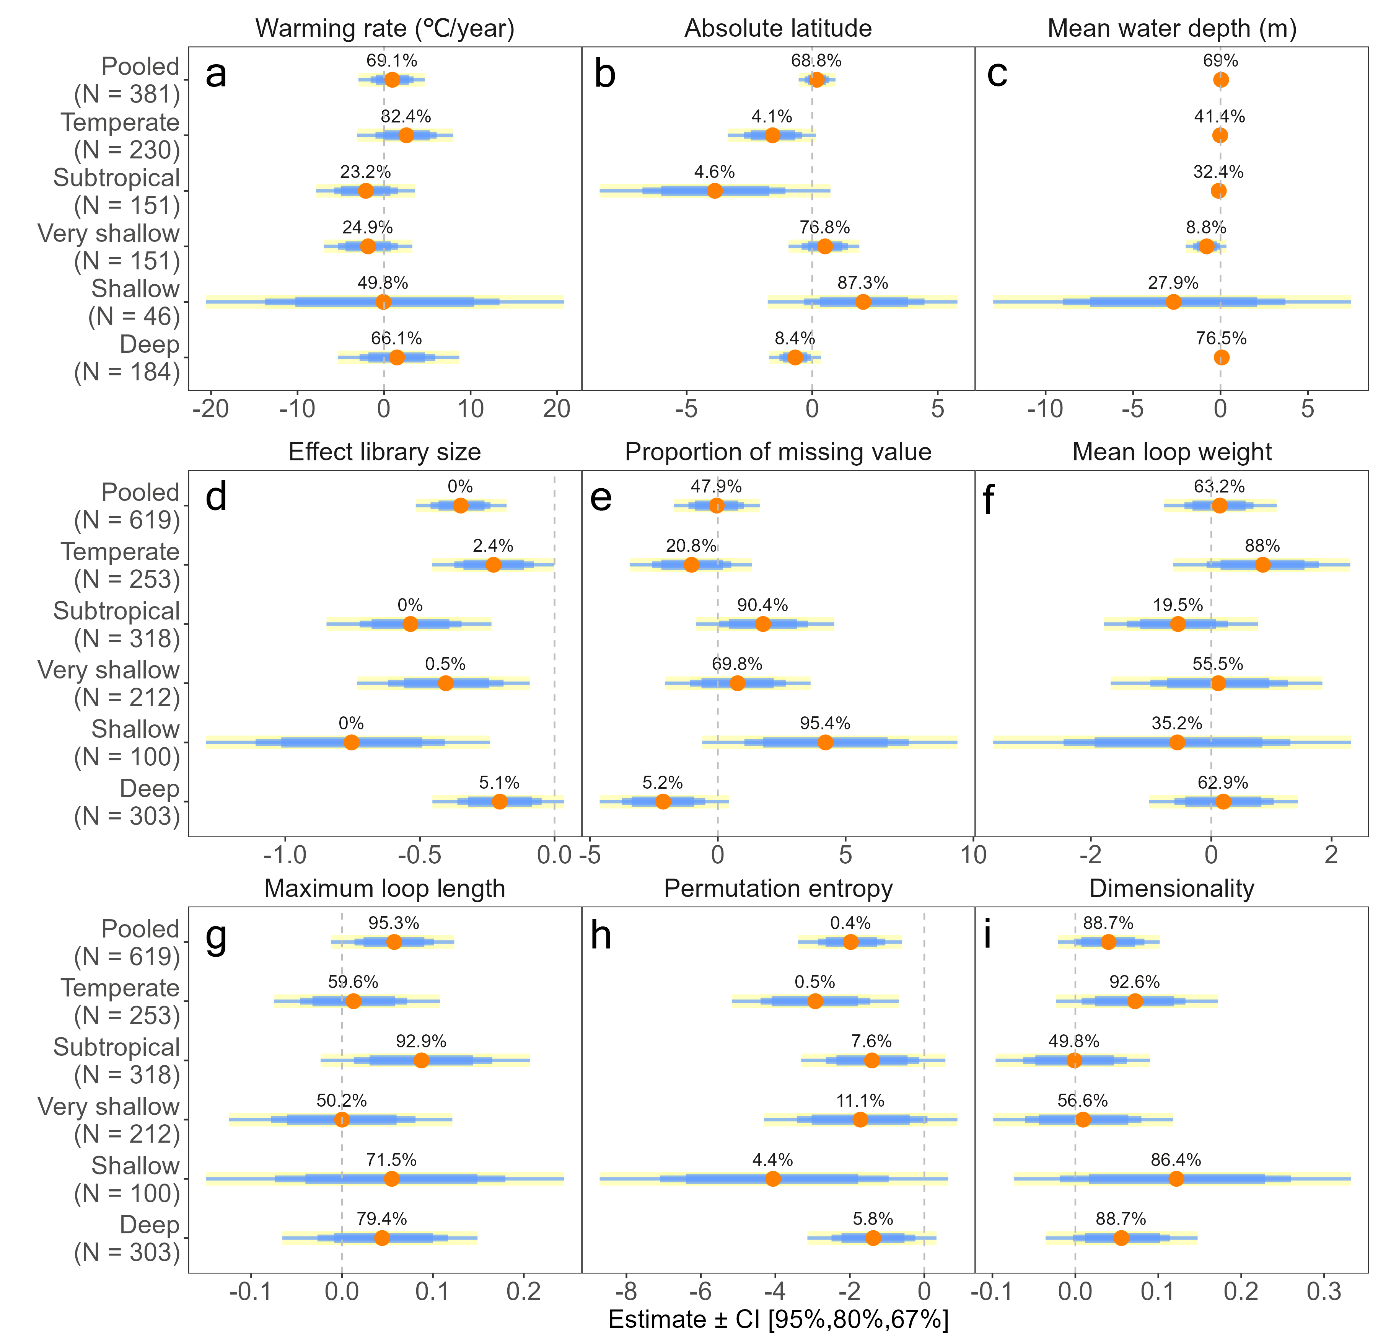


**Supplementary Figure 6 Effects of environment (a-c), effect library size (d), proportion of missing values (e), mean loop weight (f), maximum loop length (g) and dynamic complexity (h: dimensionality and i: permutation entropy) on the probability of chaotic classification (1-non-chaotic and never instable , 2-non-chaotic with local instability, 3-chaotic) for the chl-*a* time series.** Orange dots are marginal posterior means, bands in blue shades show 67, 80 and 95% credible intervals centered on the mean, and numbers refer to proportions of the posterior distribution greater than zero, estimated by hierarchical Bayesian models with random effects of sites nested within lakes.


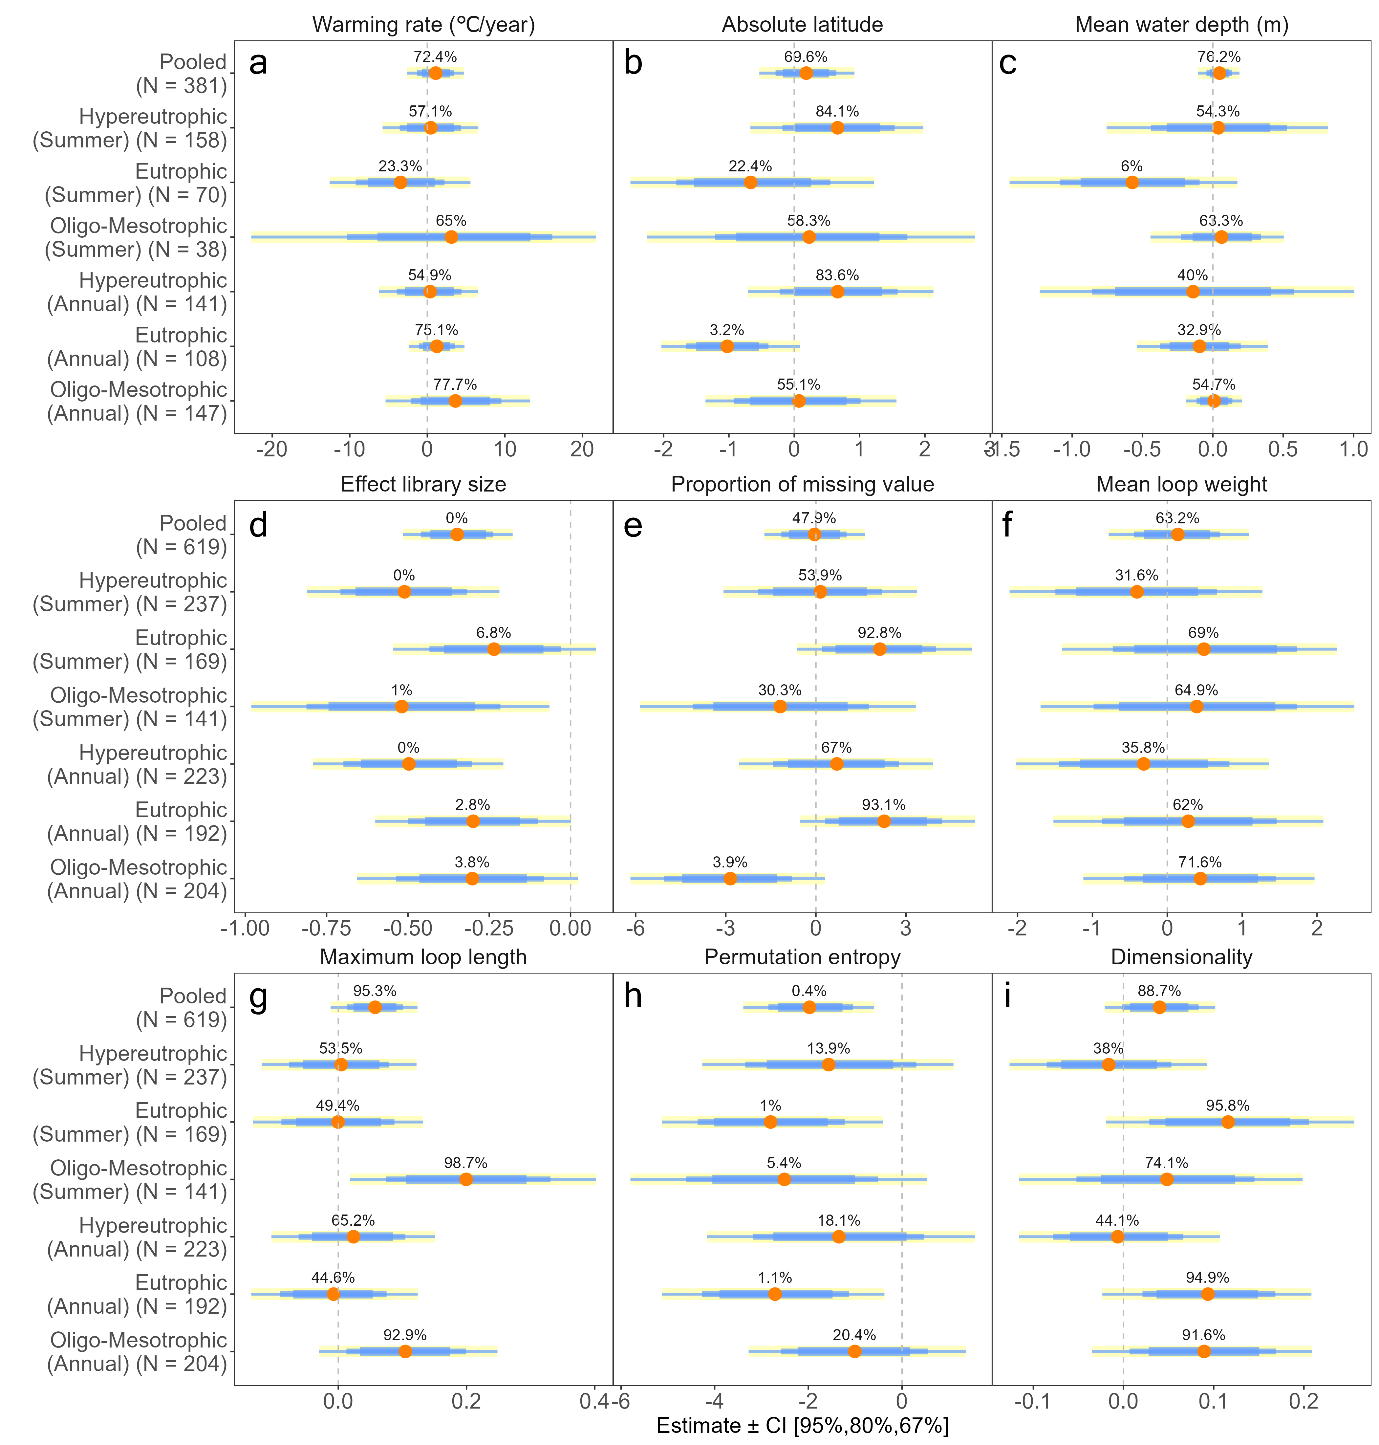


**Supplementary Figure 7 Effects of environment (a-c), effect library size (d), proportion of missing values (e), mean loop weight (f), maximum loop length (g) and dynamic complexity (h: dimensionality and i: permutation entropy) on the probability of chaotic classification (1-non-chaotic and never instable , 2-non-chaotic with local instability, 3-chaotic) for the chl-a time series across lakes with distinct trophic status.** The lakes were classified as oligo-mesotrophic (chl *a* ≤ 7 μg L−1), eutrophic (7 < chl *a* ≤ 30 μg L−1) and hypereutrophic (chl *a* > 30 μg L−1) using summer mean and annual mean chl *a* values, respectively. Orange dots are marginal posterior means, bands in blue shades show 67, 80 and 95% credible intervals centered on the mean, and numbers refer to proportions of the posterior distribution greater than zero, estimated by hierarchical Bayesian models with random effects of sites nested within lakes.


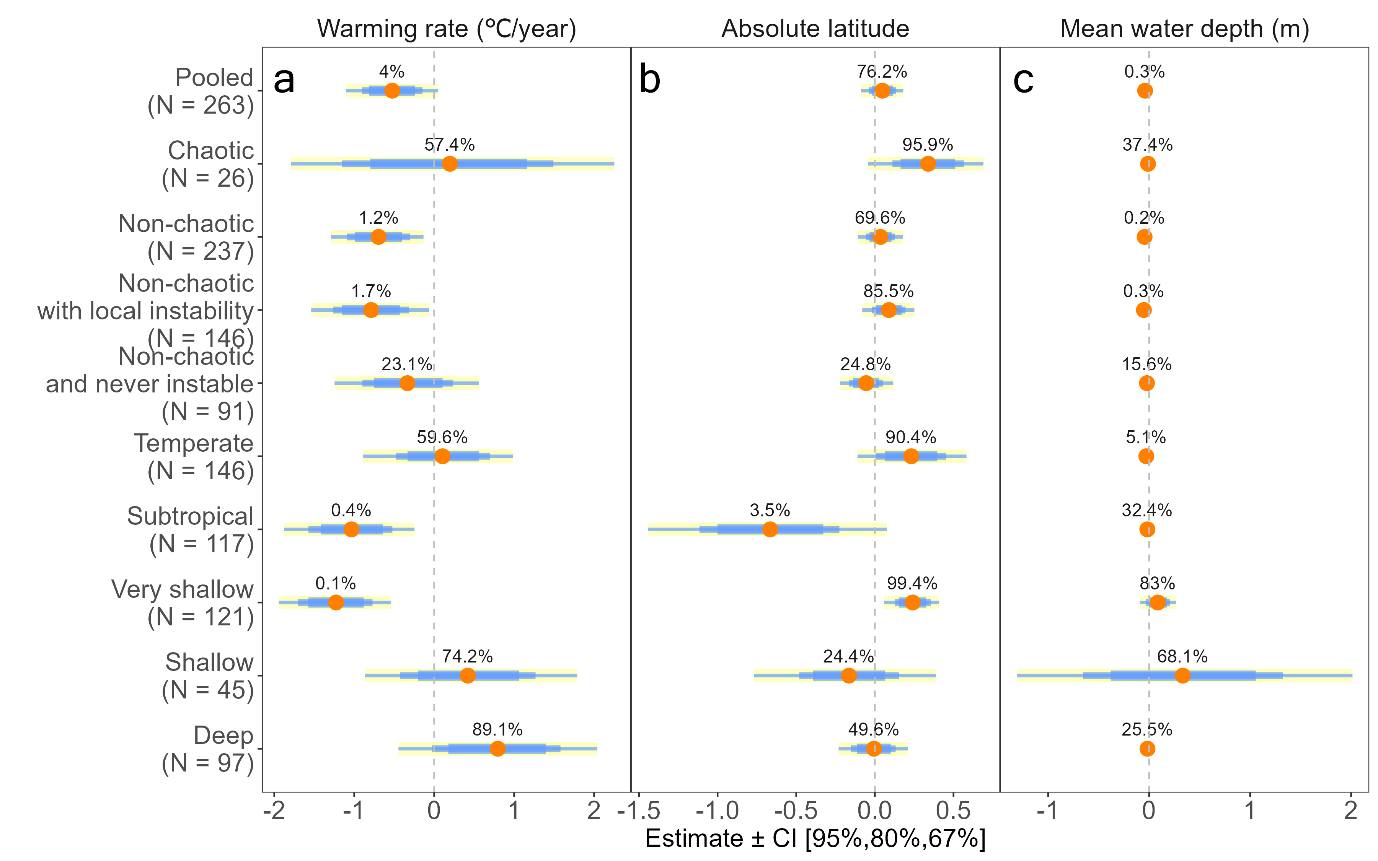


**Supplementary Figure 8 Environmental effects on the maximum loop weight of feedback.** Effects of warming rate **(a)**, absolute latitude **(b)** and mean water depth **(c)** on the maximum loop weight of causal feedback associated with chl *a* across all lakes combined and for various data subsets. Orange dots are marginal posterior means, bands in blue shades show 67, 80 and 95% credible intervals centered on the mean, and numbers refer to proportions of the posterior distribution greater than zero, estimated by hierarchical Bayesian models with random effects of sites nested within lakes.


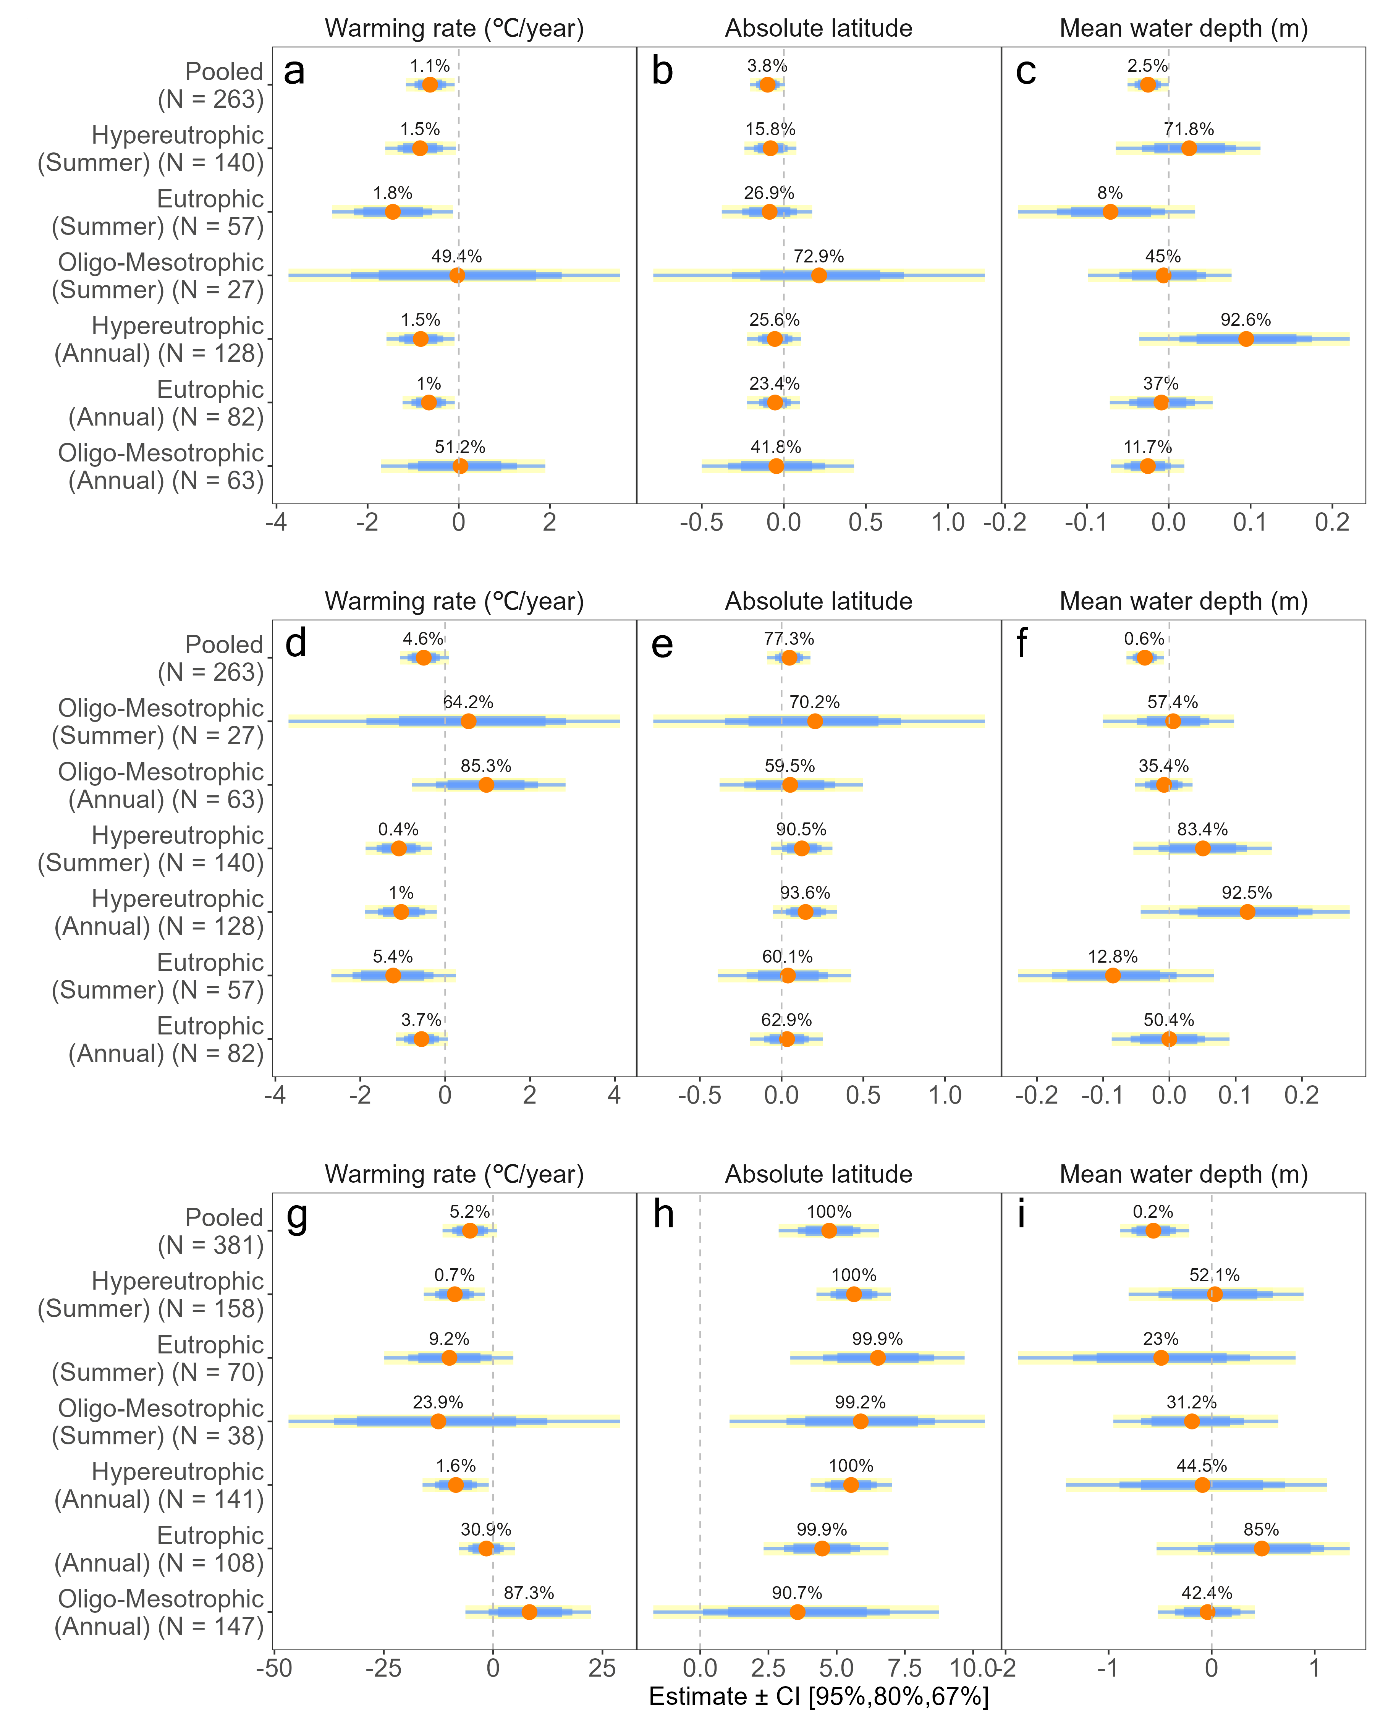


**Supplementary Figure 9 Environmental effects on the loop weight and length of feedback across lakes with distinct trophic status.** Effects of warming rate, absolute latitude and mean water depth on the mean loop weight **(a-c)**, maximum loop weight (**d-f**) and maximum loop length (**g-i**) of causal feedback associated with chl *a* across subsets of lakes with varying trophic status. The lakes were classified as oligo-mesotrophic (chl *a* ≤ 7 μg L−1), eutrophic (7 < chl *a* ≤ 30 μg L−1) and hypereutrophic (chl *a* > 30 μg L−1) using summer mean and annual mean chl *a* values, respectively. Orange dots are marginal posterior means, bands in blue shades show 67, 80 and 95% credible intervals centered on the mean, and numbers refer to proportions of the posterior distribution greater than zero, estimated by hierarchical Bayesian models with random effects of sites nested within lakes.


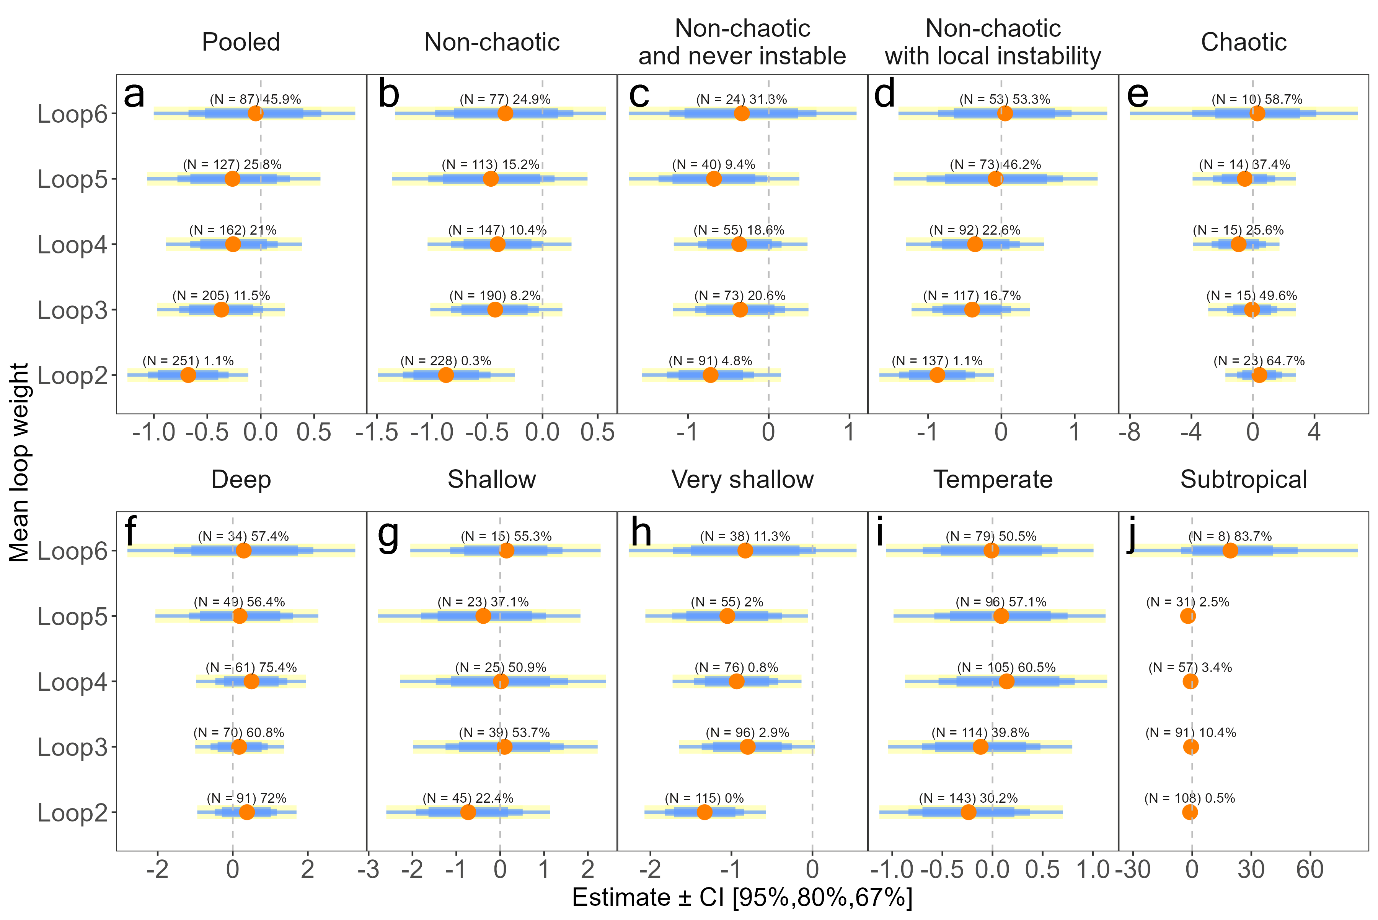


**Supplementary Figure 10 Warming effects on the mean loop weight of different types of feedback.** Effects of warming rate on the mean loop weight of causal feedback associated with chl a across all lakes combined and for various data subsets. Loop7 was excluded due to having very few cases and lack of convergence for most data subsets. Orange dots are marginal posterior means, bands in blue shades show 67, 80 and 95% credible intervals centered on the mean, and numbers refer to proportions of the posterior distribution greater than zero, estimated by hierarchical Bayesian models with random effects of sites nested within lakes.


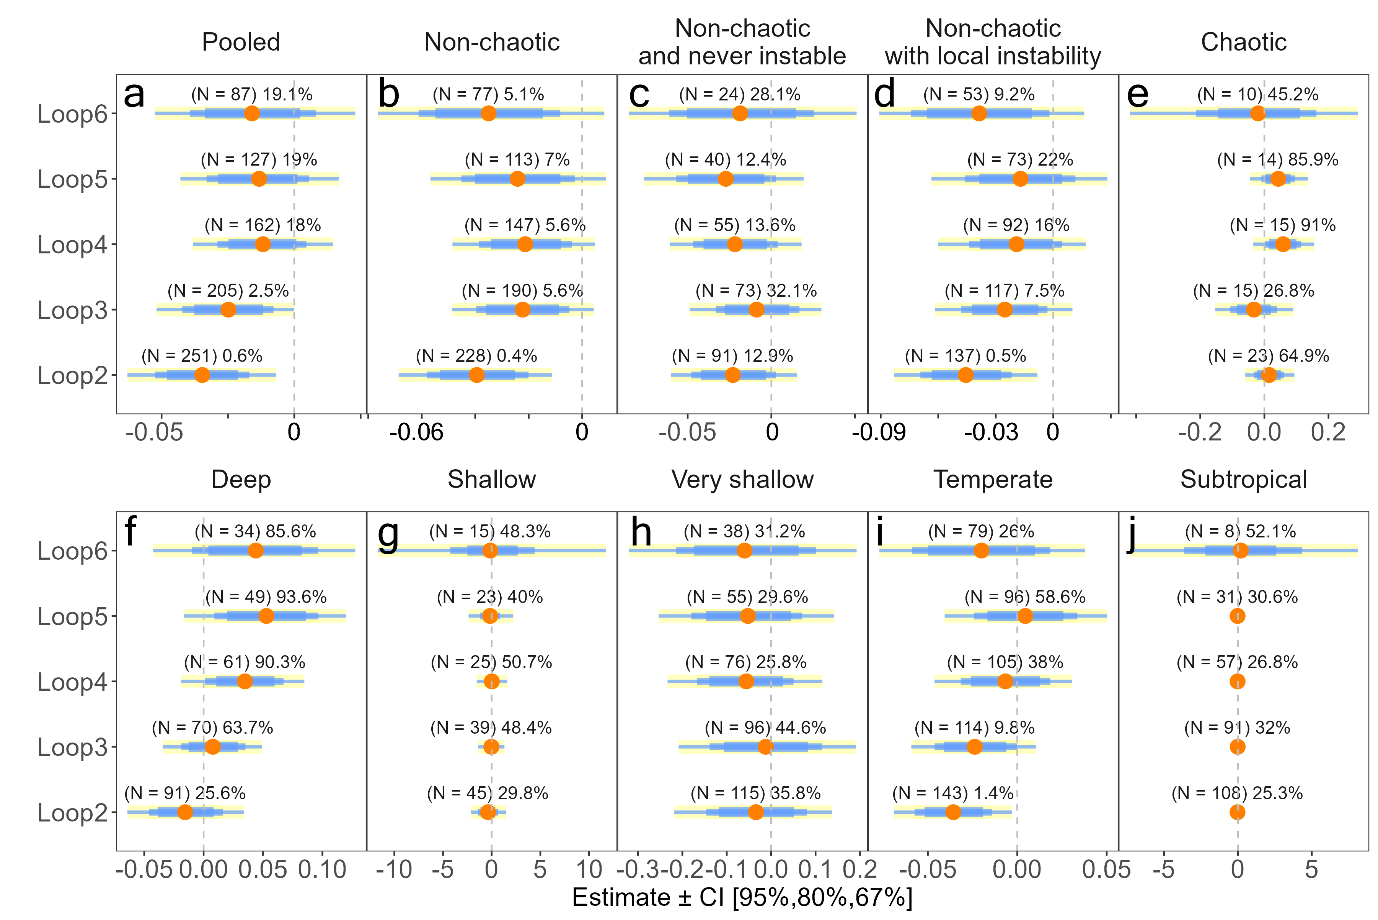


**Supplementary Figure 11 Depth effects on the mean loop weight of different types of feedback.** Effects of mean water depth on the mean loop weight of causal feedback associated with chl *a* across all lakes combined and for various data subsets. Loop7 was excluded due to very few cases and lack of convergence for most data subsets. Orange dots are marginal posterior means, bands in blue shades show 67, 80 and 95% credible intervals centered on the mean, and numbers refer to proportions of the posterior distribution greater than zero, estimated by hierarchical Bayesian models with random effects of sites nested within lakes.


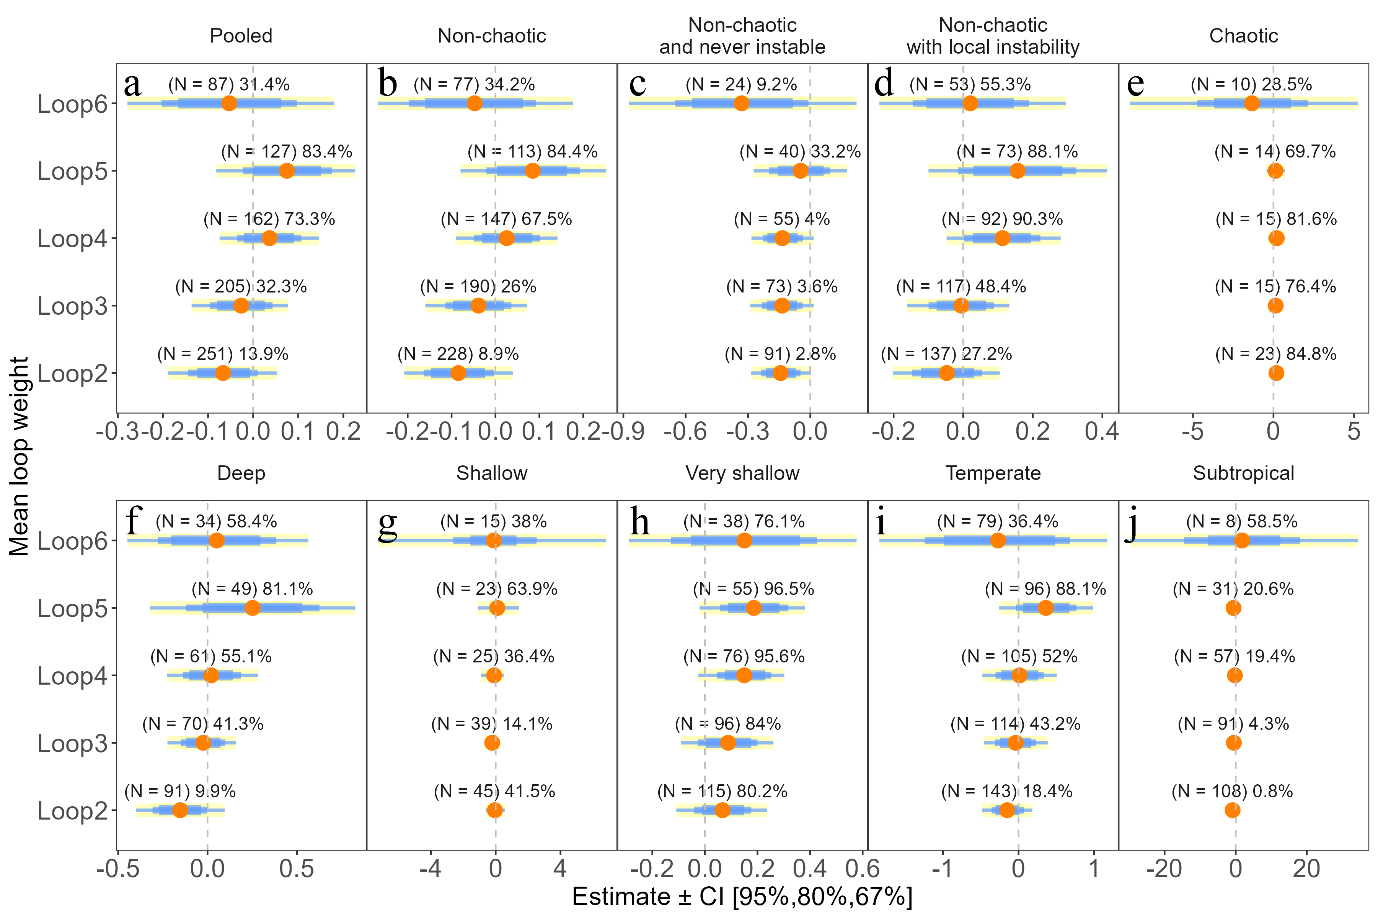


**Supplementary Figure 12 Latitude effects on the mean loop weight of different types of feedback.** Effects of absolute latitude on the mean loop weight of causal feedback associated with chl *a* across all lakes combined and for various data subsets. Loop7 was excluded because due to very few cases and lack of convergence for most data subsets. Orange dots are marginal posterior means, bands in blue shades show 67, 80 and 95% credible intervals centered on the mean, and numbers refer to proportions of the posterior distribution greater than zero, estimated by hierarchical Bayesian models with random effects of sites nested within lakes.


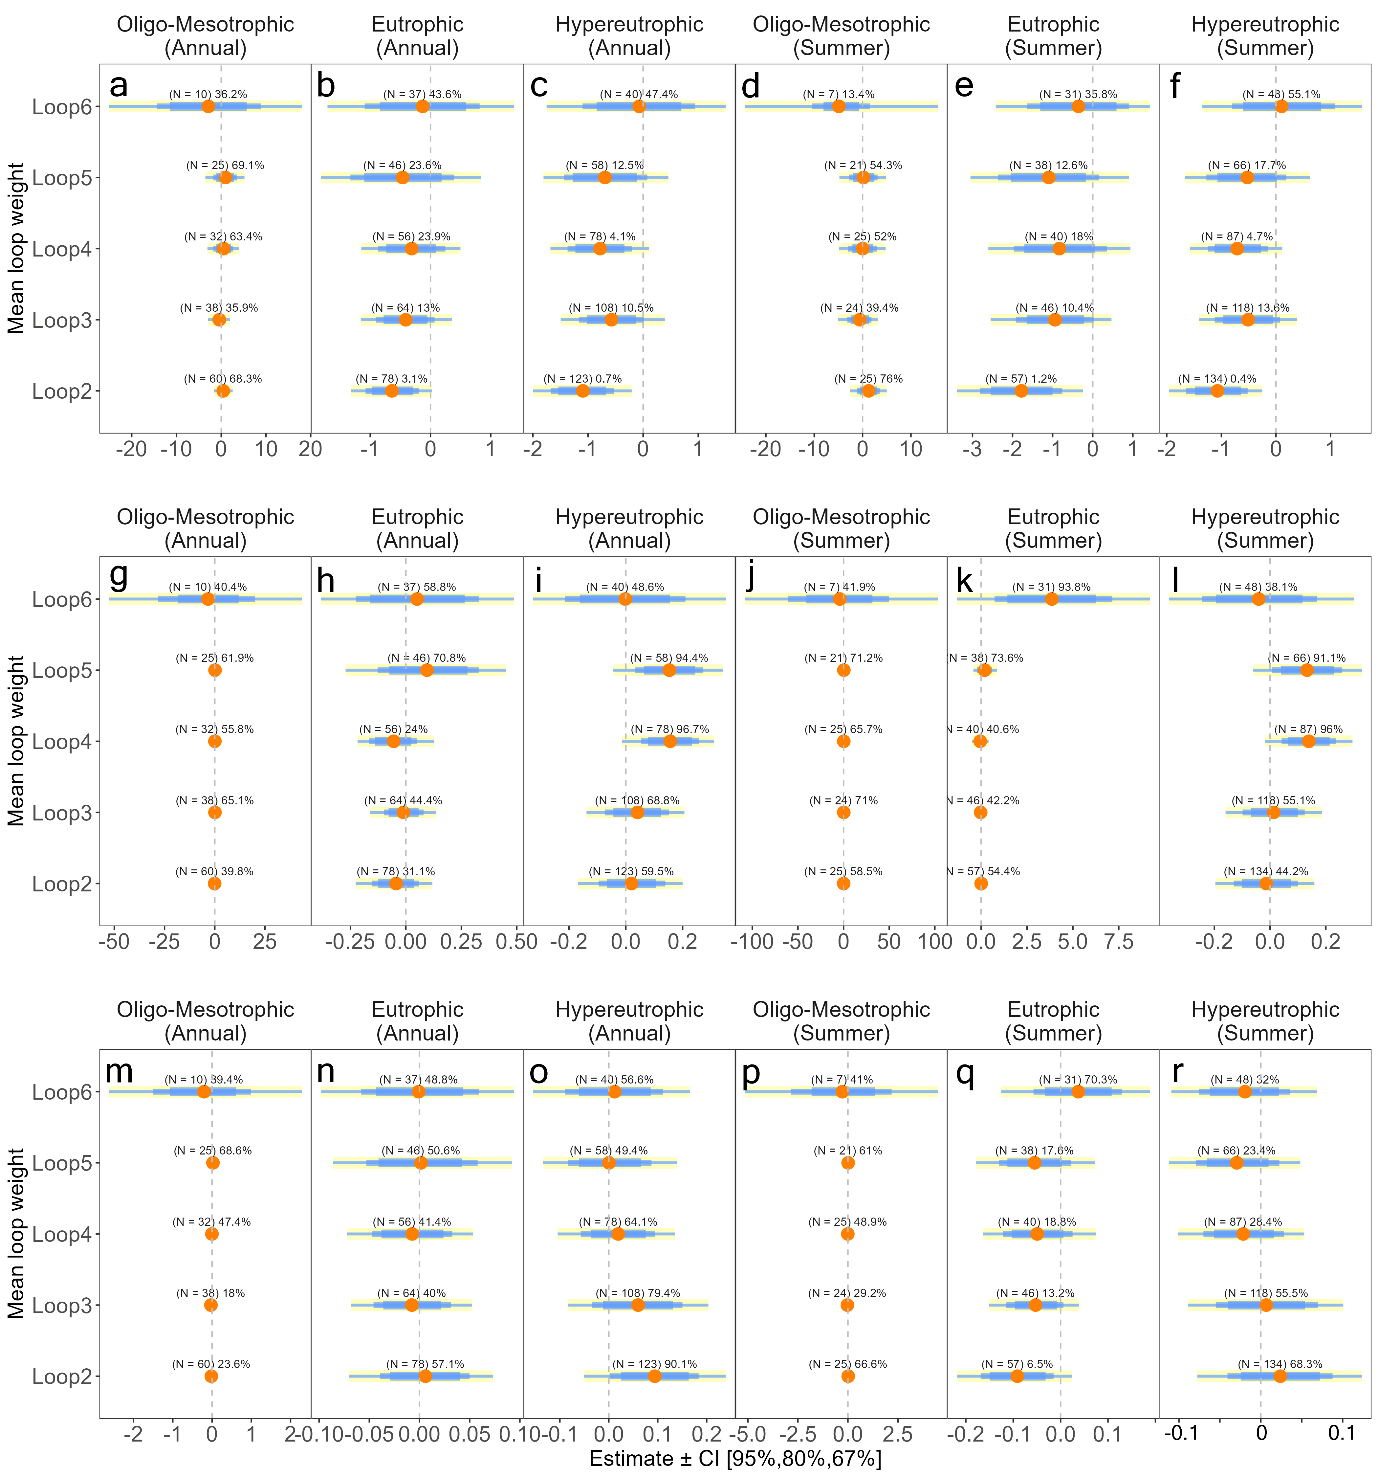


**Supplementary Figure 13 Environmental effects on the mean loop weight of different types of feedback across lakes with distinct trophic status.** Effects of warming rate (**a-f**), absolute latitude (**g-l**) and mean water depth (**m-r**) on the mean loop weight of causal feedback associated with chl *a* across subsets of lakes with varying trophic status. The lakes were classified as oligo-mesotrophic (chl *a* ≤ 7 μg L−1), eutrophic (7 < chl *a* ≤ 30 μg L−1) and hypereutrophic (chl *a* > 30 μg L−1) using summer mean and annual mean chl *a* values, respectively. Loop7 was excluded due to very few cases and lack of convergence for most data subsets. Orange dots are marginal posterior means, bands in blue shades show 67, 80 and 95% credible intervals centered on the mean, and numbers refer to proportions of the posterior distribution greater than zero, estimated by hierarchical Bayesian models with random effects of sites nested within lakes.


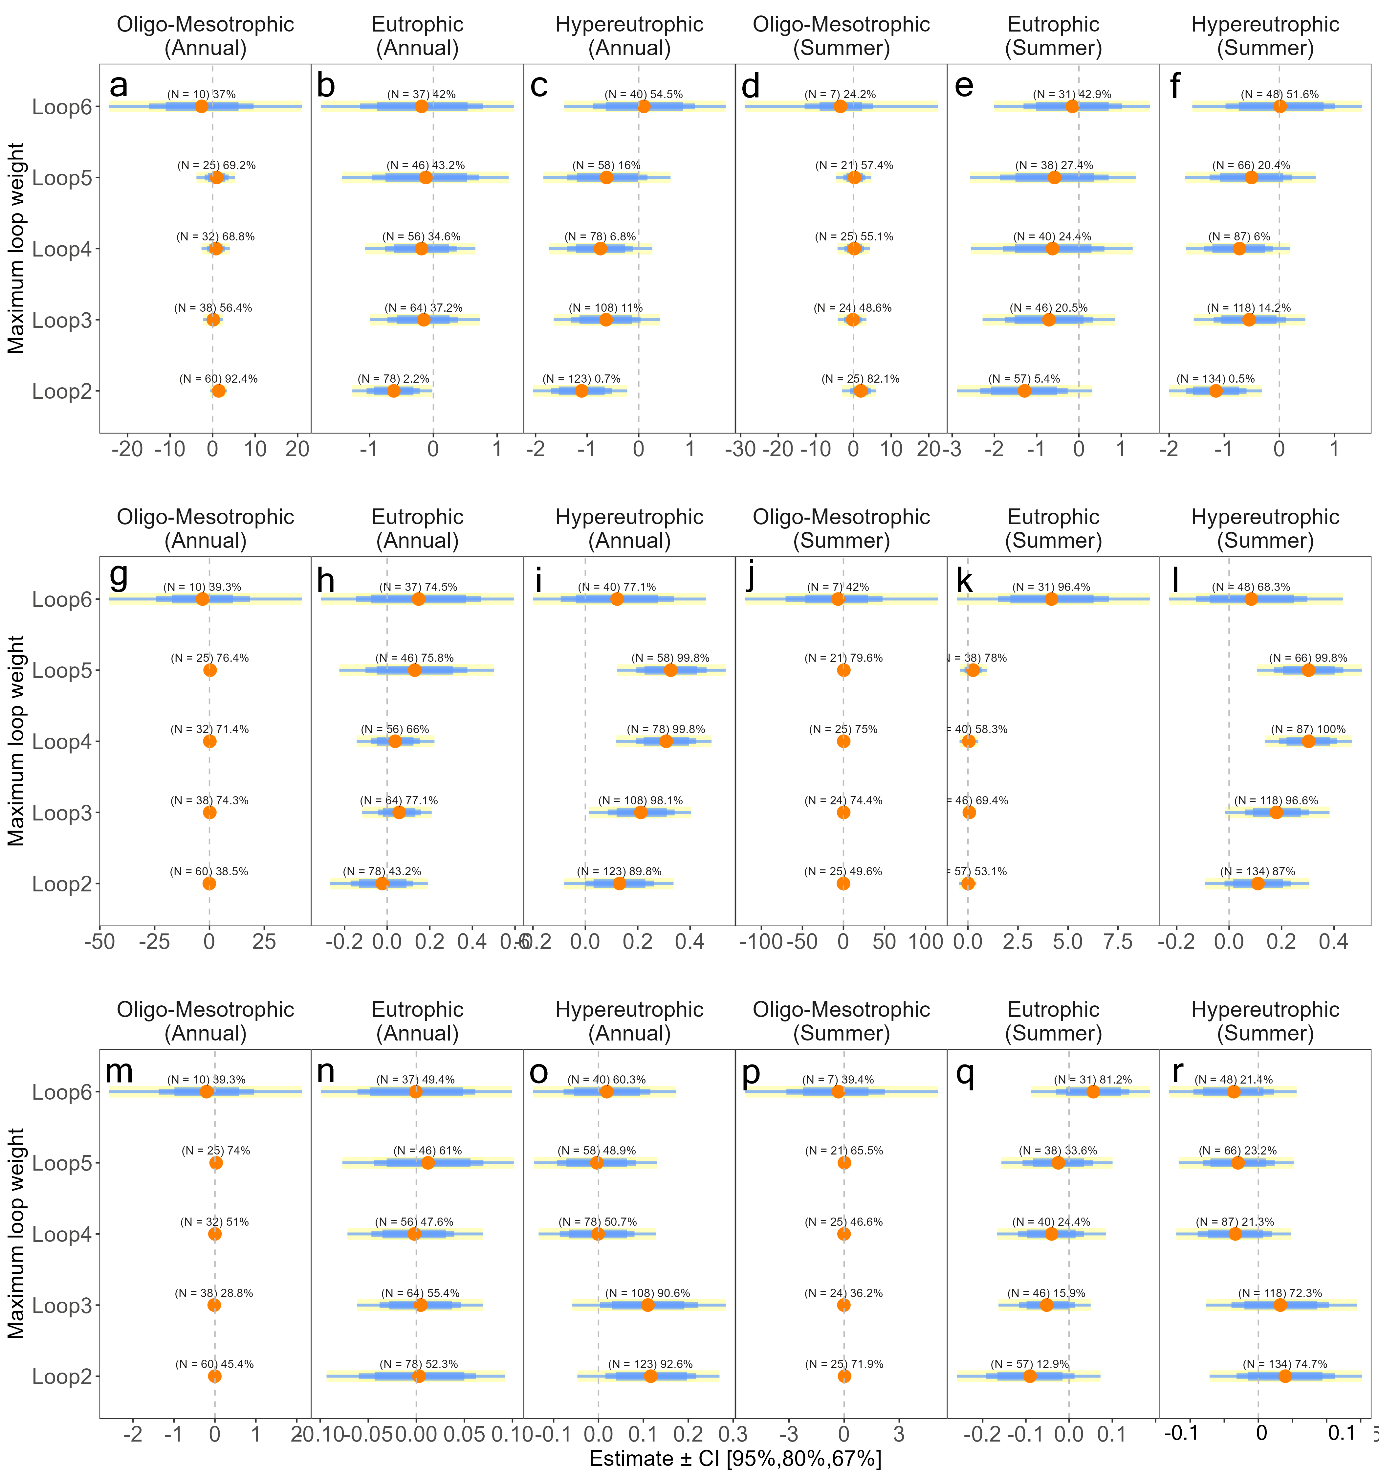


**Supplementary Figure 14 Environmental effects on the maximum loop weight of different types of feedback across lakes with distinct trophic status.** Effects of warming rate (**a-f**), absolute latitude (**g-l**) and mean water depth (**m-r**) on the maximum loop weight of causal feedback associated with chl *a* across subsets of lakes with varying trophic status. The lakes were classified as oligo-mesotrophic (chl *a* ≤ 7 μg L−1), eutrophic (7 < chl *a* ≤ 30 μg L−1) and hypereutrophic (chl *a* > 30 μg L−1) using summer mean and annual mean Chl *a* values, respectively. Loop7 was excluded due to very few cases and lack of convergence for most subsets of data. Orange dots are marginal posterior means, bands in blue shades show 67, 80 and 95% credible intervals centered on the mean, and numbers refer to proportions of the posterior distribution greater than zero, estimated by hierarchical Bayesian models with random effects of sites nested within lakes.


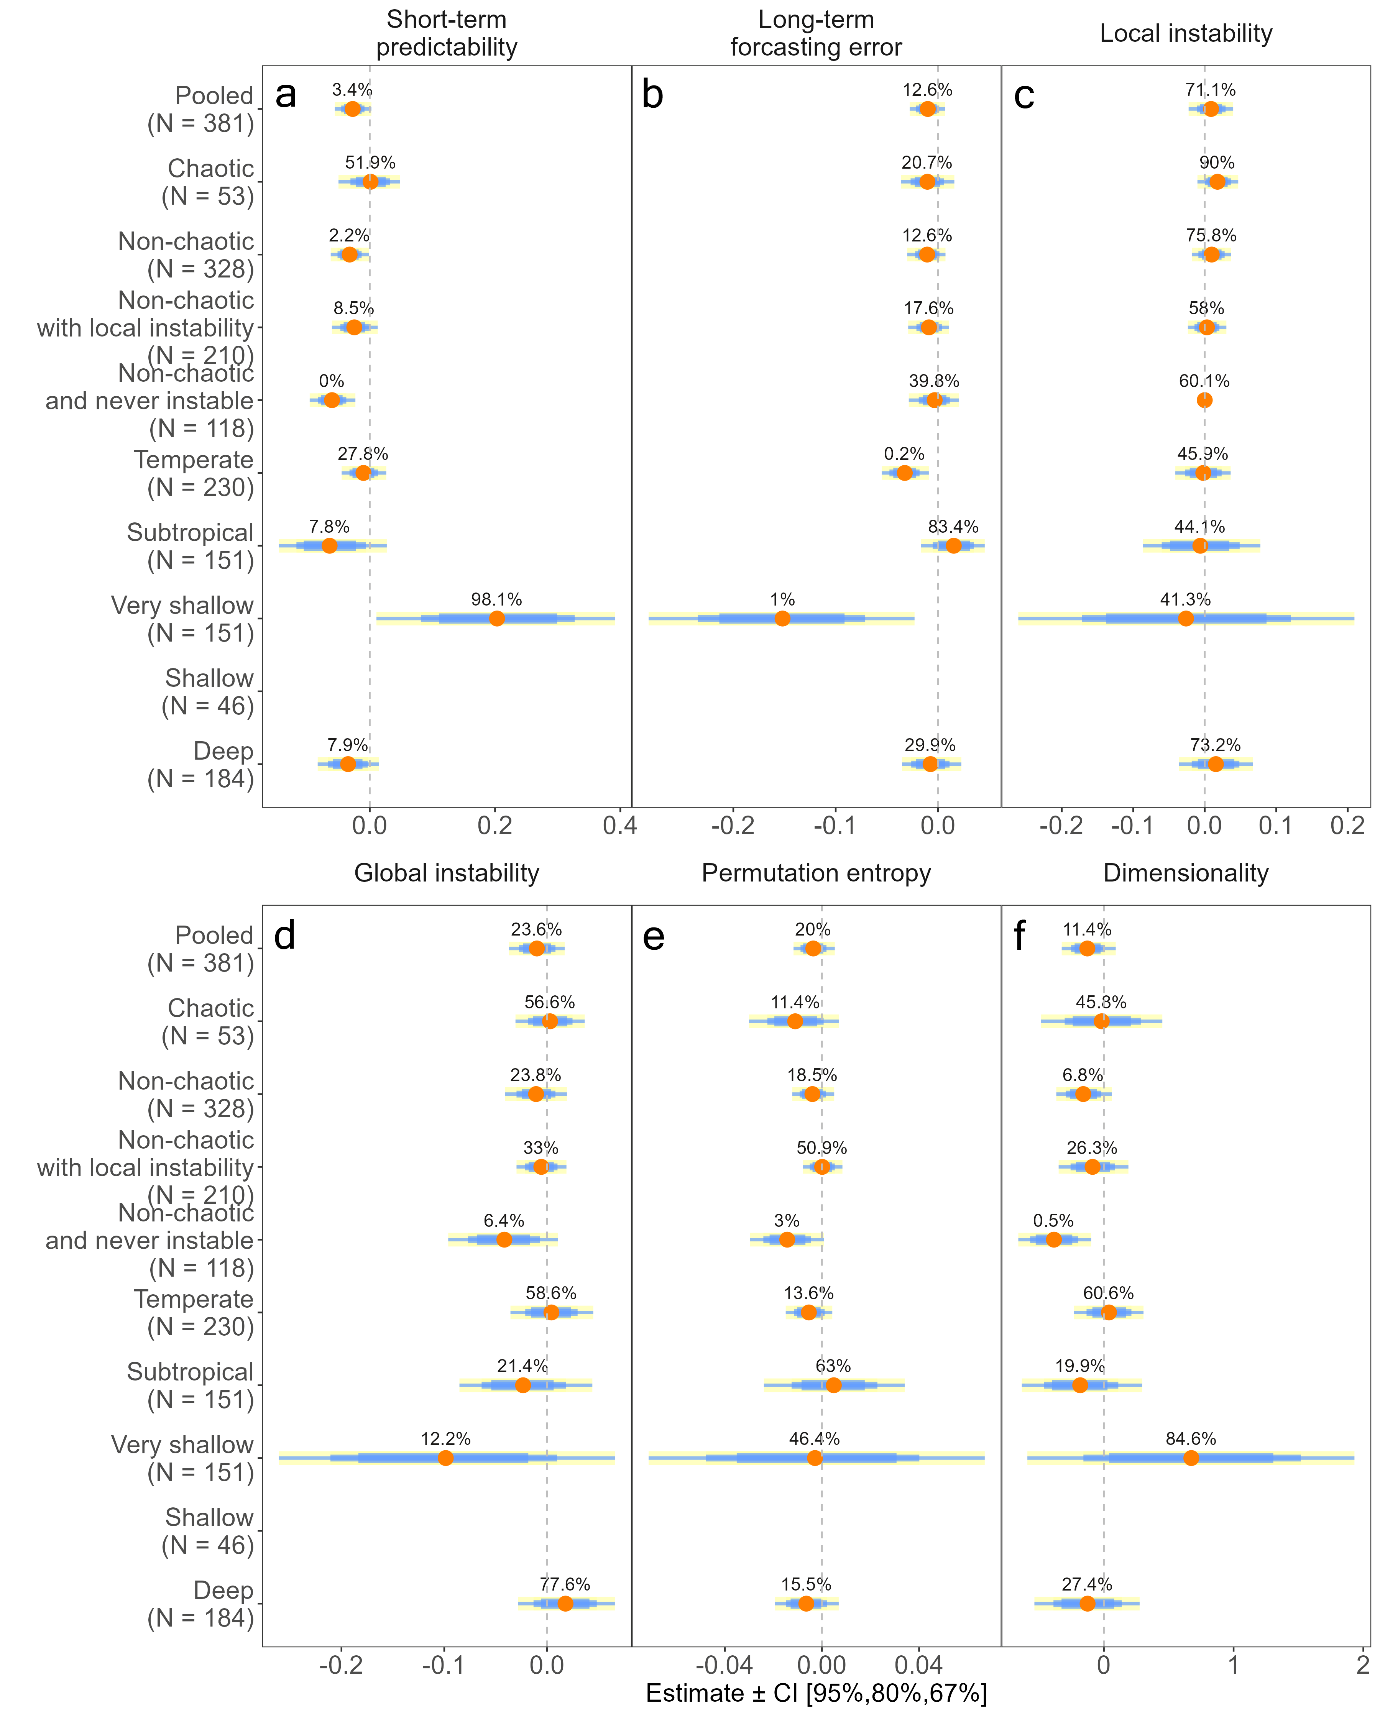


**Supplementary Figure 15 Effects of mean water depth on the dynamic properties of chl-*a* time series.** Effects of mean water depth on short-term predictability **(a)**, long-term forecasting error **(b)**, local **(c)** and global instability **(d)**, permutation entropy **(e)** and dimensionality **(f)** across all lakes combined and for various data subsets. Orange dots are marginal posterior means, bands in blue shades show 67, 80 and 95% credible intervals centered on the mean, and numbers refer to proportions of the posterior distribution greater than zero, estimated by hierarchical Bayesian models with random effects of sites nested within lakes.


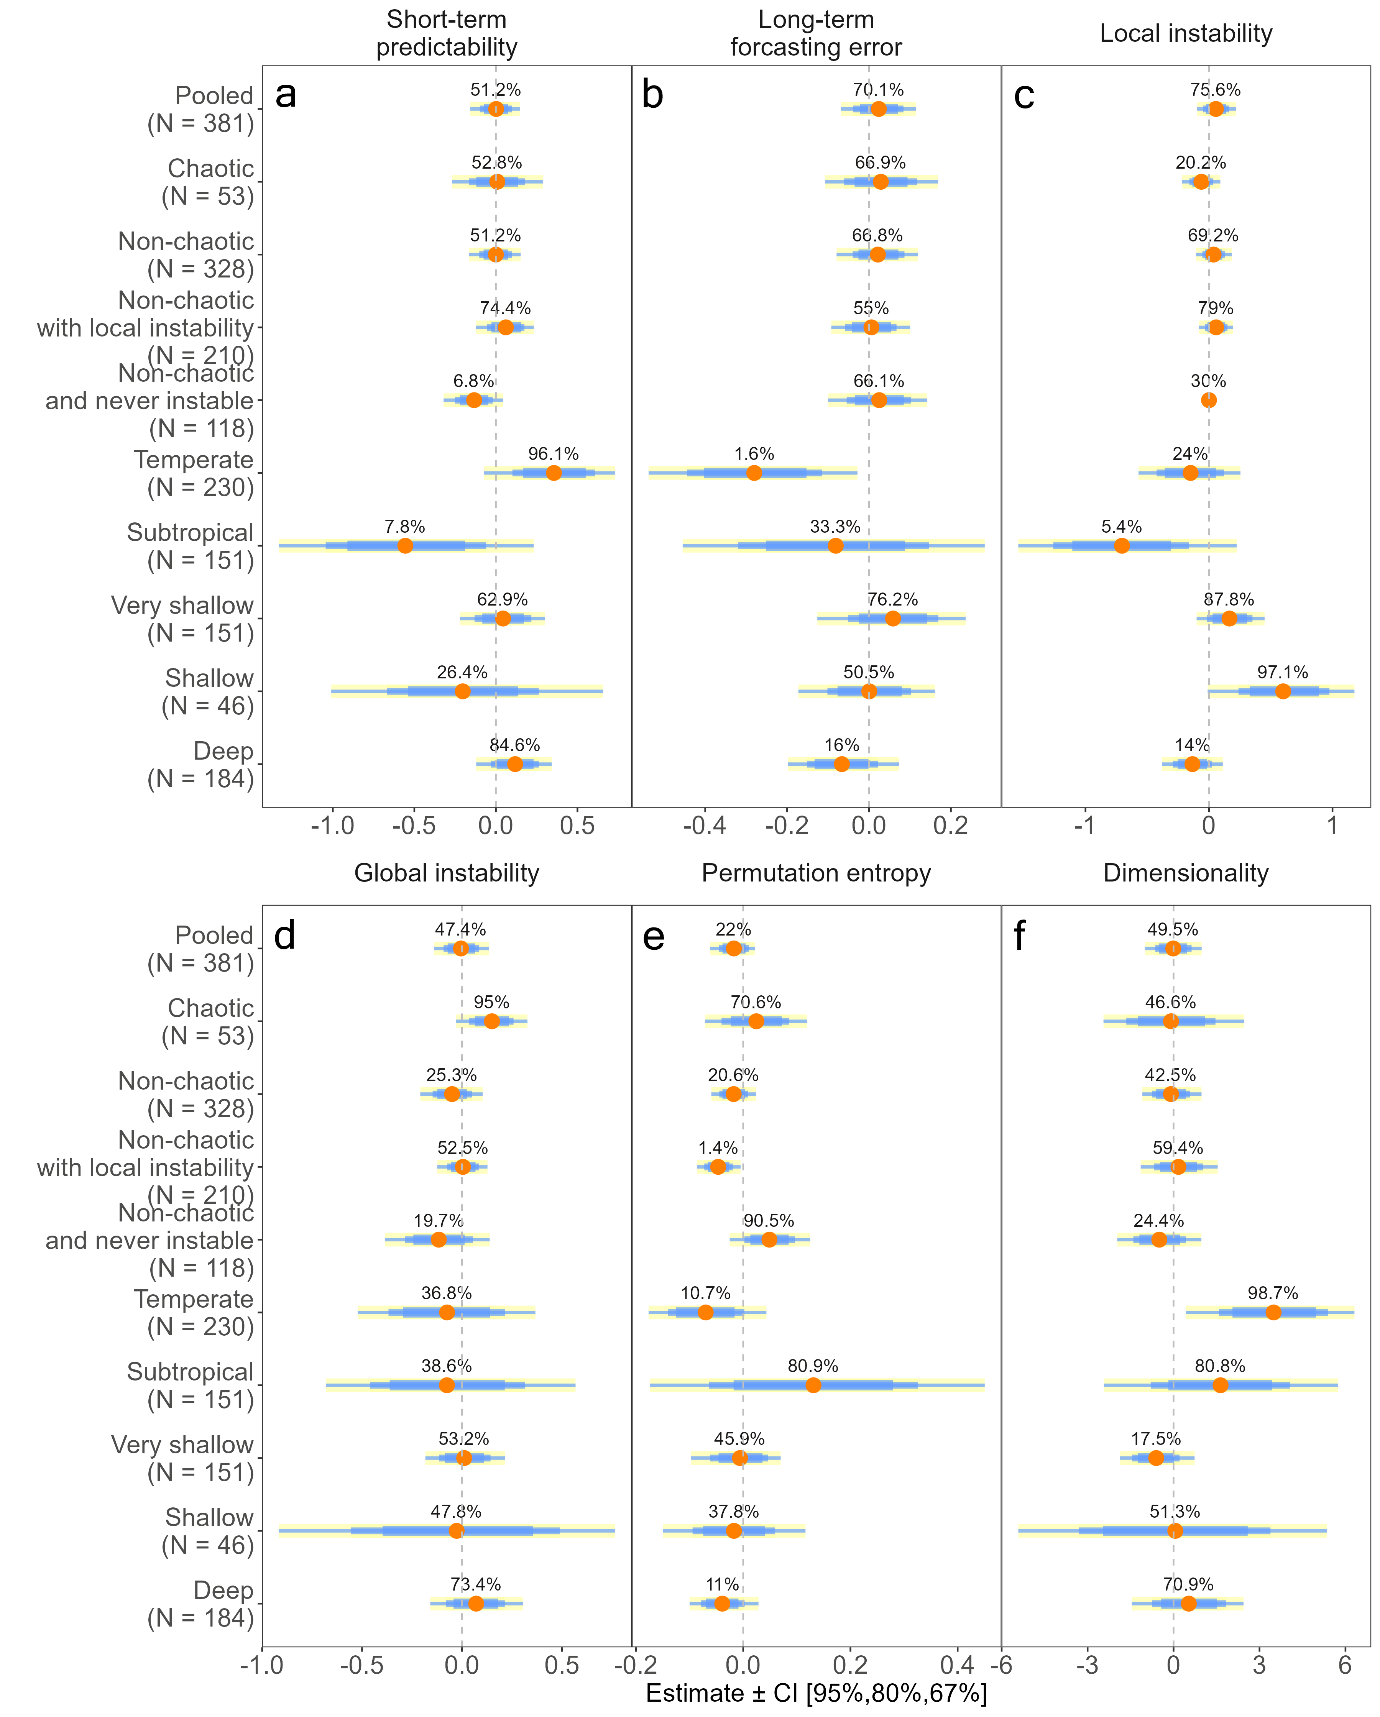


**Supplementary Figure 16 Effects of absolute latitude on the dynamic properties of chl-*a* time series.** Effects of absolute latitude on short-term predictability **(a)**, long-term forecasting error **(b)**, local **(c)** and global instability **(d)**, permutation entropy **(e)** and dimensionality **(f)** across all lakes combined and for various data subsets. Orange dots are marginal posterior means, bands in blue shades show 67, 80 and 95% credible intervals centered on the mean, and numbers refer to proportions of the posterior distribution greater than zero, estimated by hierarchical Bayesian models with random effects of sites nested within lakes.


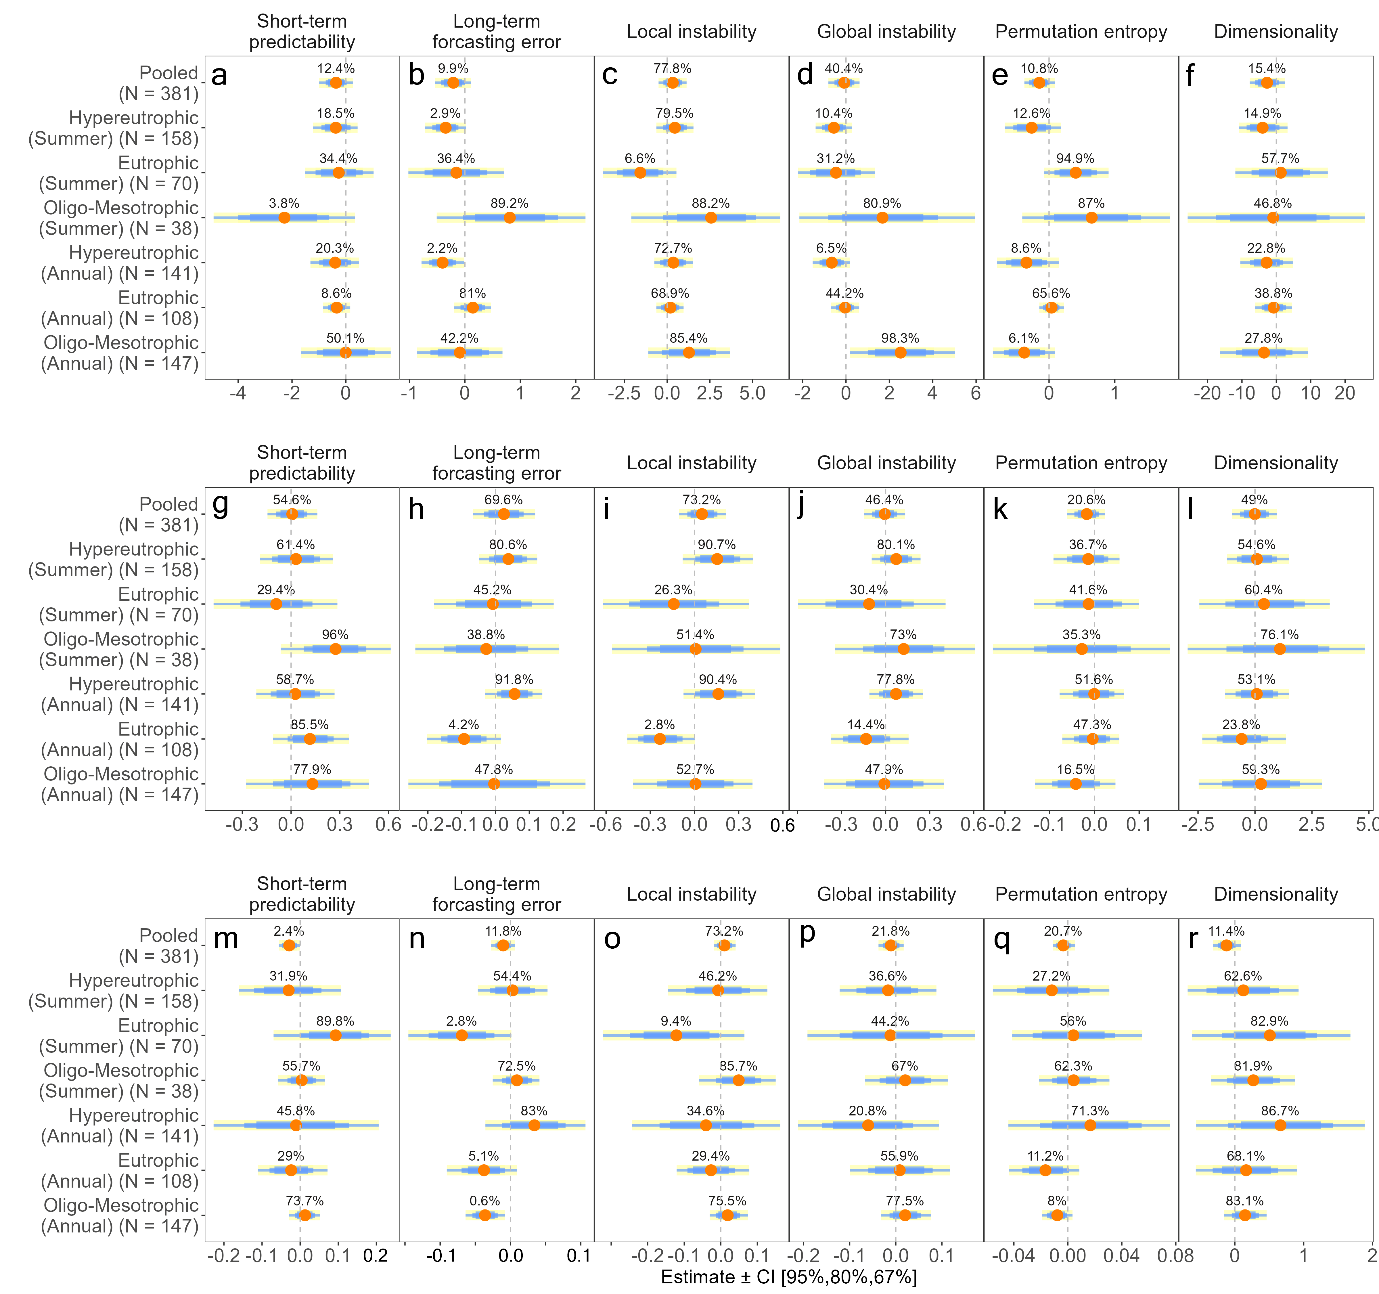


**Supplementary Figure 17 Environmental effects on the dynamic properties of chl-*a* time series.** Effects of warming rate (**a-f**), absolute latitude (**g-l**) and mean water depth (**m-r**) on short-term predictability, long-term forecasting error, local and global instability, permutation entropyand dimensionality across subsets of lakes with varying trophic status. The lakes were classified as oligo-mesotrophic (chl *a* ≤ 7 μg L−1), eutrophic (7 < chl *a* ≤ 30 μg L−1) and hypereutrophic (chl *a* > 30 μg L−1) using summer mean and annual mean chl *a* values, respectively. Orange dots are marginal posterior means, bands in blue shades show 67, 80 and 95% credible intervals centered on the mean, and numbers refer to proportions of the posterior distribution greater than zero, estimated by hierarchical Bayesian models with random effects of sites nested within lakes.


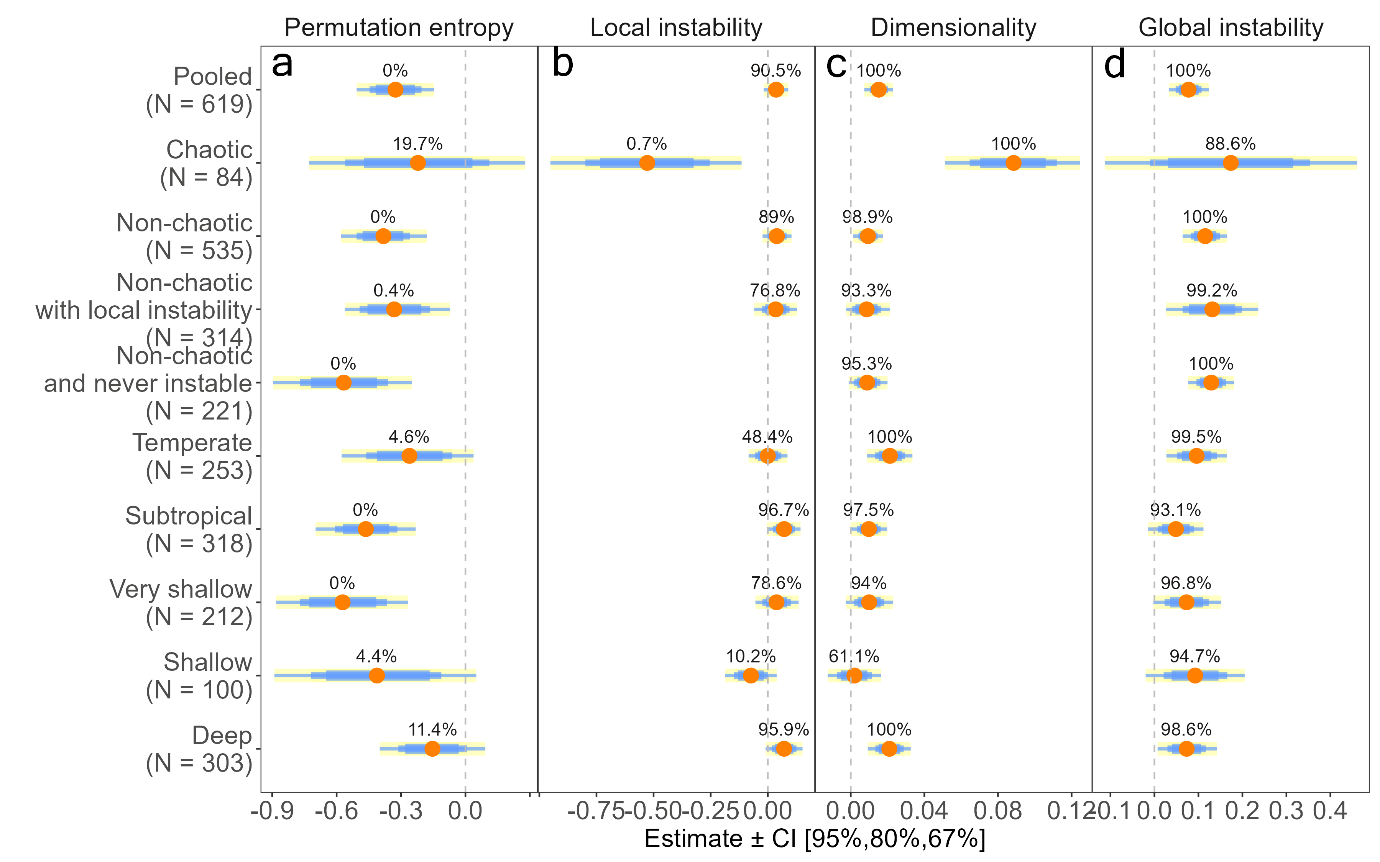


**Supplementary Figure 18 Effects of dynamic complexity and instability on the short-term predictability of chl-*a* time series.** Effects of permutation entropy (**a**), local instability (**b**), dimensionality (**c**) and global instability (**d**) on the short-term predictability across all lakes combined and for various data subsets. Orange dots are marginal posterior means, bands in blue shades show 67, 80 and 95% credible intervals centered on the mean, and numbers refer to proportions of the posterior distribution greater than zero, estimated by hierarchical Bayesian models with random effects of sites nested within lakes.


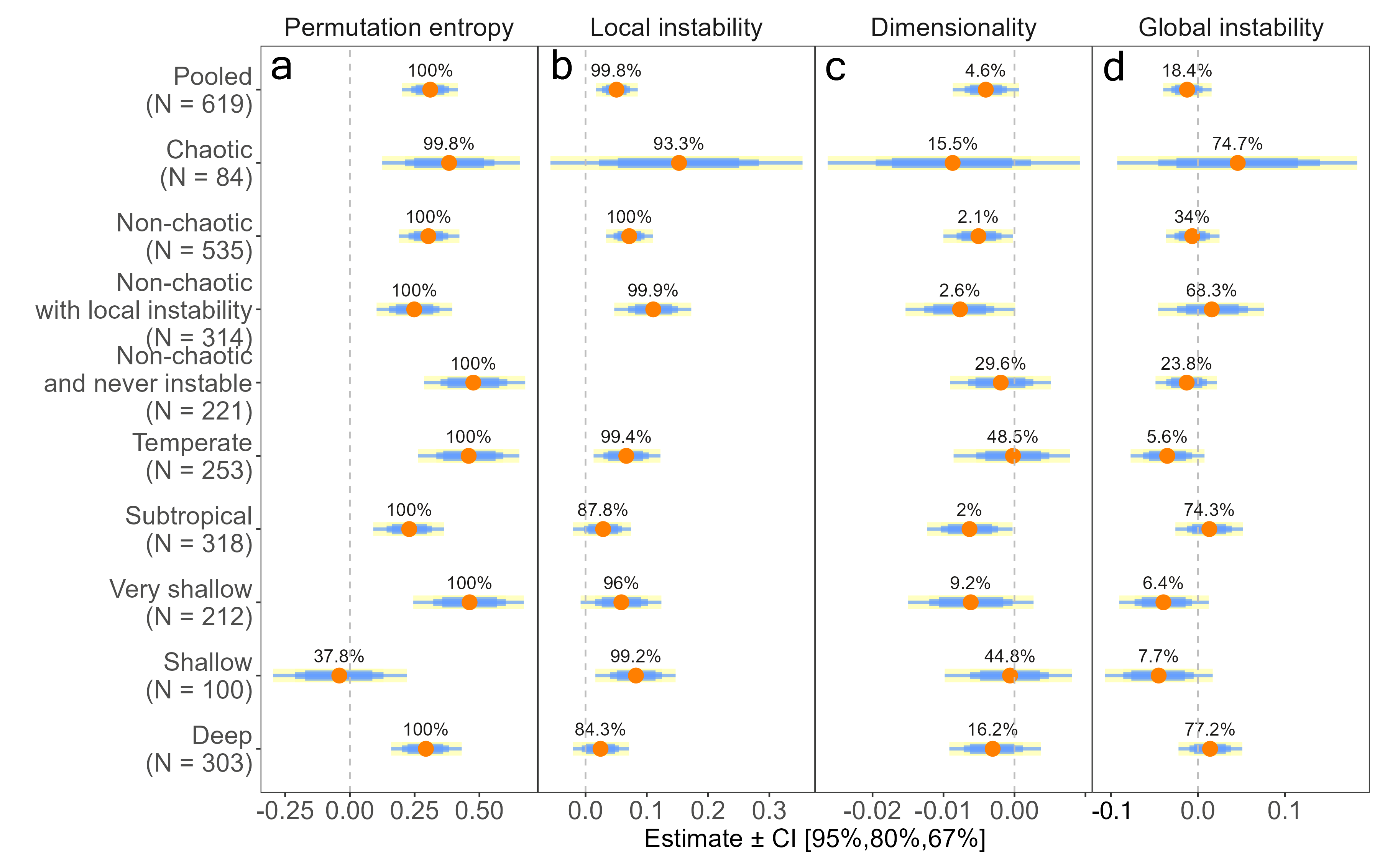


**Supplementary Figure 19 Effects of dynamic complexity and instability on the long-term forecasting error of chl-*a* time series.** Effects of permutation entropy (**a**), local instability (**b**), dimensionality (**c**) and global instability (**d**) on the long-term forecasting error across all lakes combined and for various data subsets. Orange dots are marginal posterior means, bands in blue shades show 67, 80 and 95% credible intervals centered on the mean, and numbers refer to proportions of the posterior distribution greater than zero, estimated by hierarchical Bayesian models with random effects of sites nested within lakes.


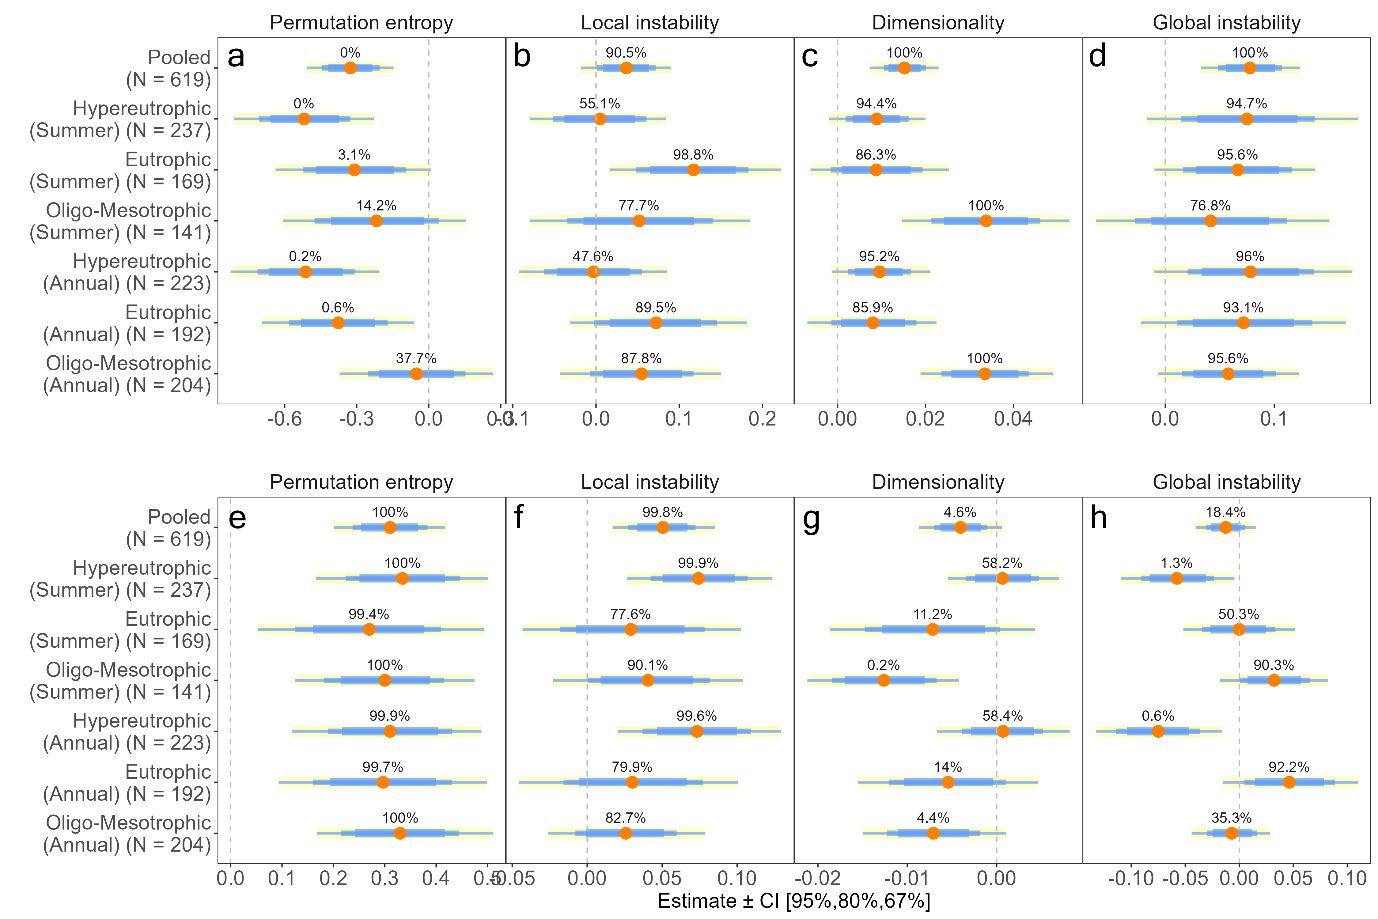


**Supplementary Figure 20 Effects of dynamic complexity and instability on the predictability of chl-*a* time series across lakes with distinct trophic status.** Effects of permutation entropy, local instability, dimensionality, global instability on the short-term predictability (**a-d**) and long-term forecasting error (**e-h**) across subsets of lakes with varying trophic status. The lakes were classified as oligo-mesotrophic (chl *a* ≤ 7 μg L−1), eutrophic (7 < chl *a* ≤ 30 μg L−1) and hypereutrophic (chl *a* > 30 μg L−1) using summer mean and annual mean chl *a* values, respectively. Orange dots are marginal posterior means, bands in blue shades show 67, 80 and 95% credible intervals centered on the mean, and numbers refer to proportions of the posterior distribution greater than zero, as estimated by hierarchical Bayesian models with random effects of sites nested within lakes.


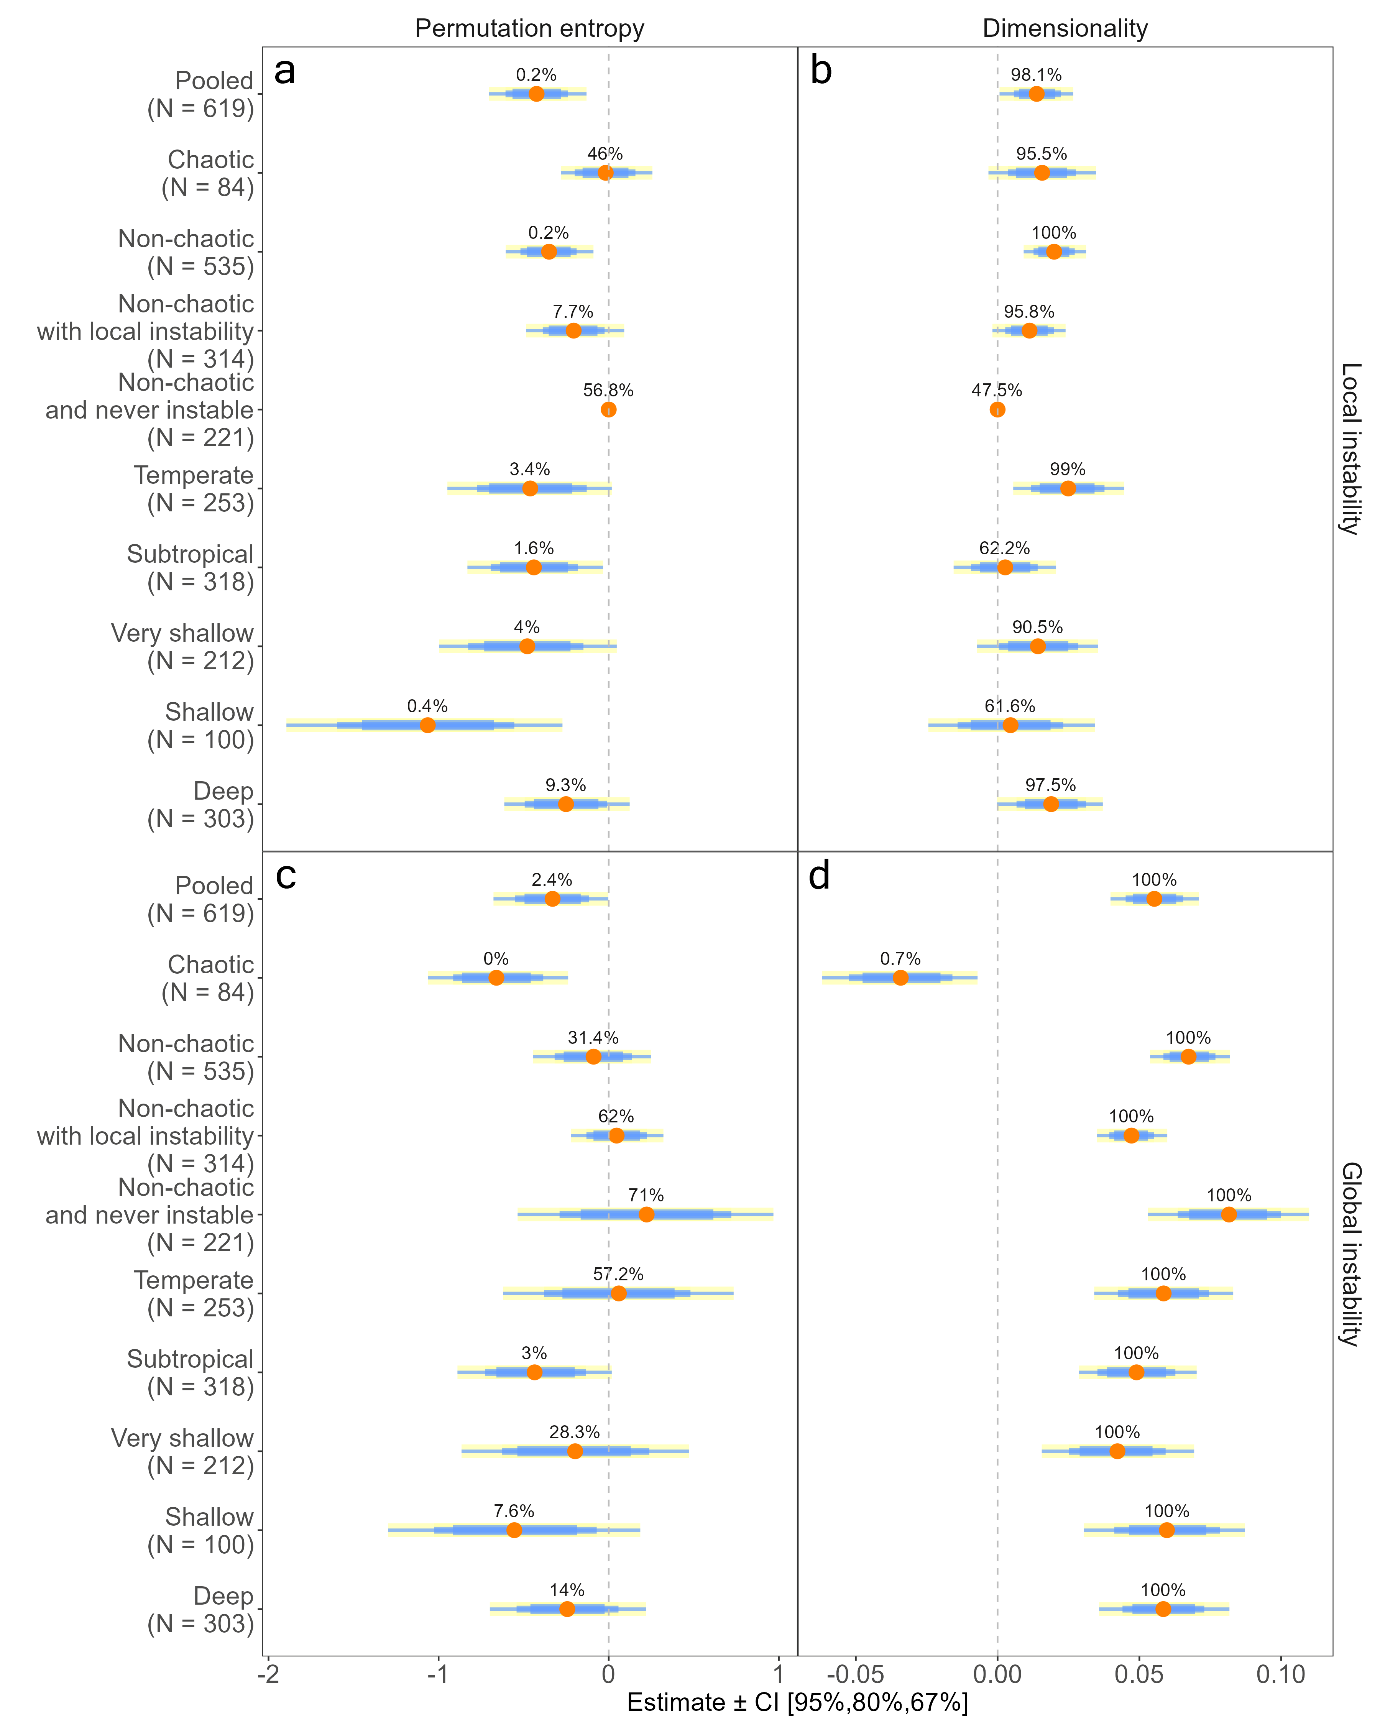


**Supplementary Figure 21 Effects of dynamic complexity on the dynamic instability of chl-*a* time series.** Effects of permutation entropy (**a, c**) and dimensionality (**b, d**) on the local and global instability across all lakes combined and for various data subsets. Orange dots are marginal posterior means, bands in blue shades show 67, 80 and 95% credible intervals centered on the mean, and numbers refer to proportions of the posterior distribution greater than zero, estimated by hierarchical Bayesian models with random effects of sites nested within lakes.


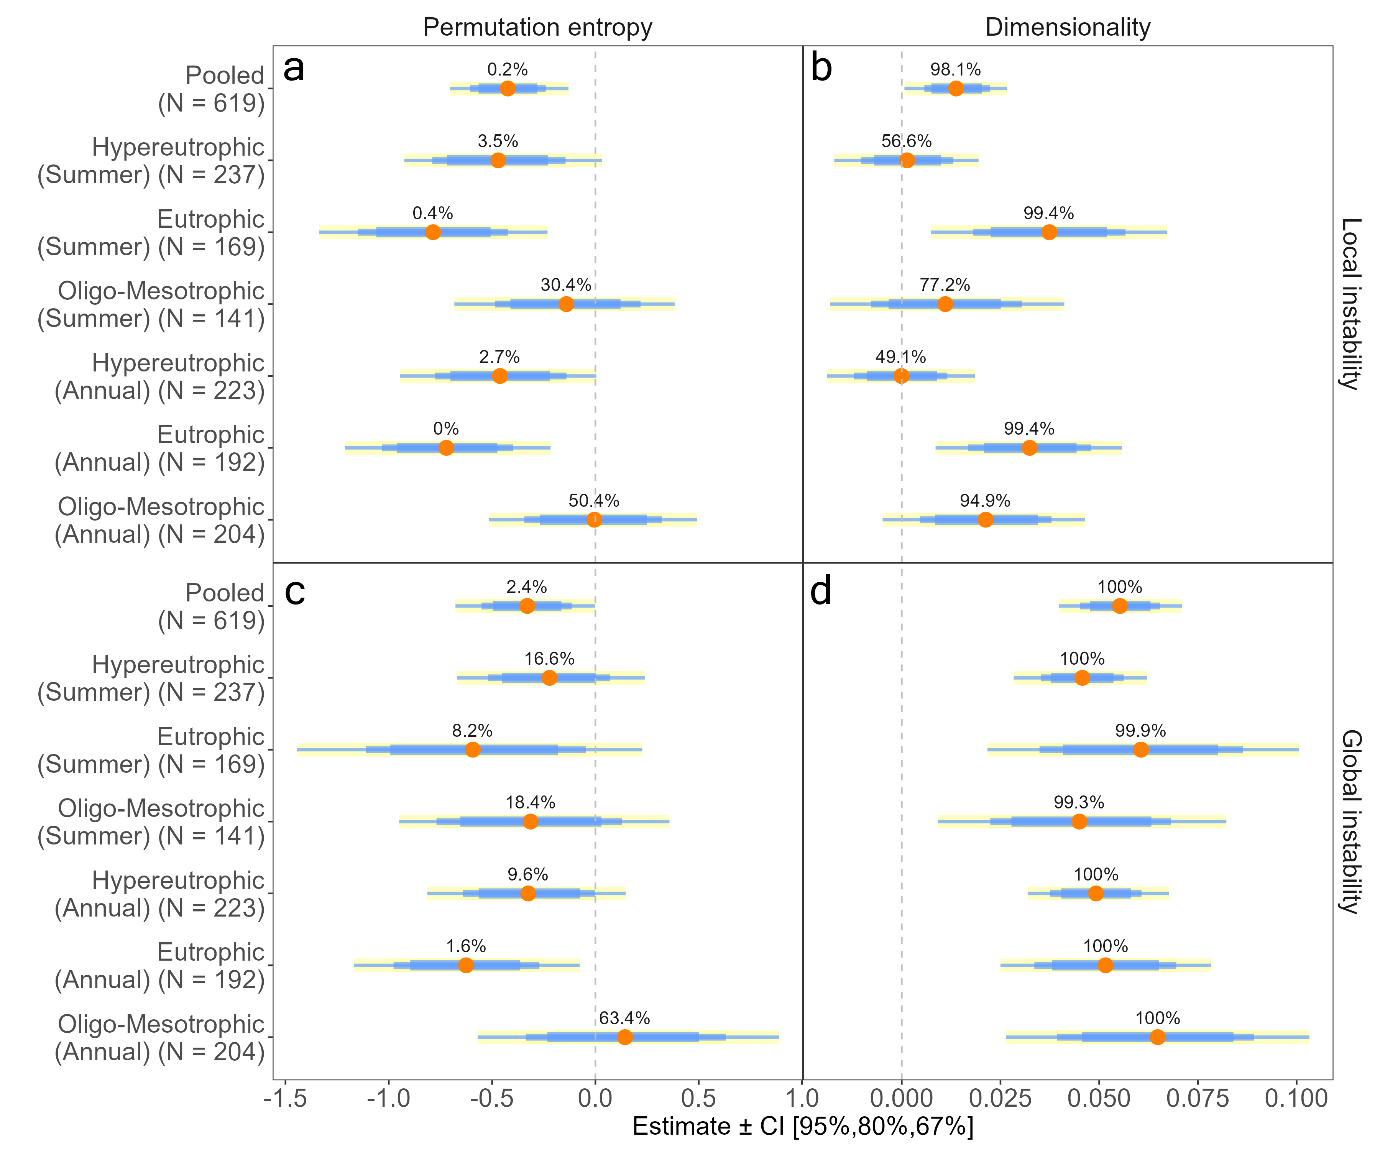


**Supplementary Figure 22 Effects of dynamic complexity on the dynamic instability of chl-*a* time series across lakes with distinct trophic status.** Effects of permutation entropy (**a, c**) and dimensionality (**b, d**) on the local and global instability across subsets of lakes with varying trophic status. The lakes were classified as oligo-mesotrophic (Chl *a* ≤ 7 μg L−1), eutrophic (7 < Chl *a* ≤ 30 μg L−1) and hypereutrophic (Chl *a* > 30 μg L−1) using summer mean and annual mean Chl *a* values, respectively. Orange dots are marginal posterior means, bands in blue shades show 67, 80 and 95% credible intervals centered on the mean, and numbers refer to proportions of the posterior distribution greater than zero, estimated by hierarchical Bayesian models with random effects of sites nested within lakes.


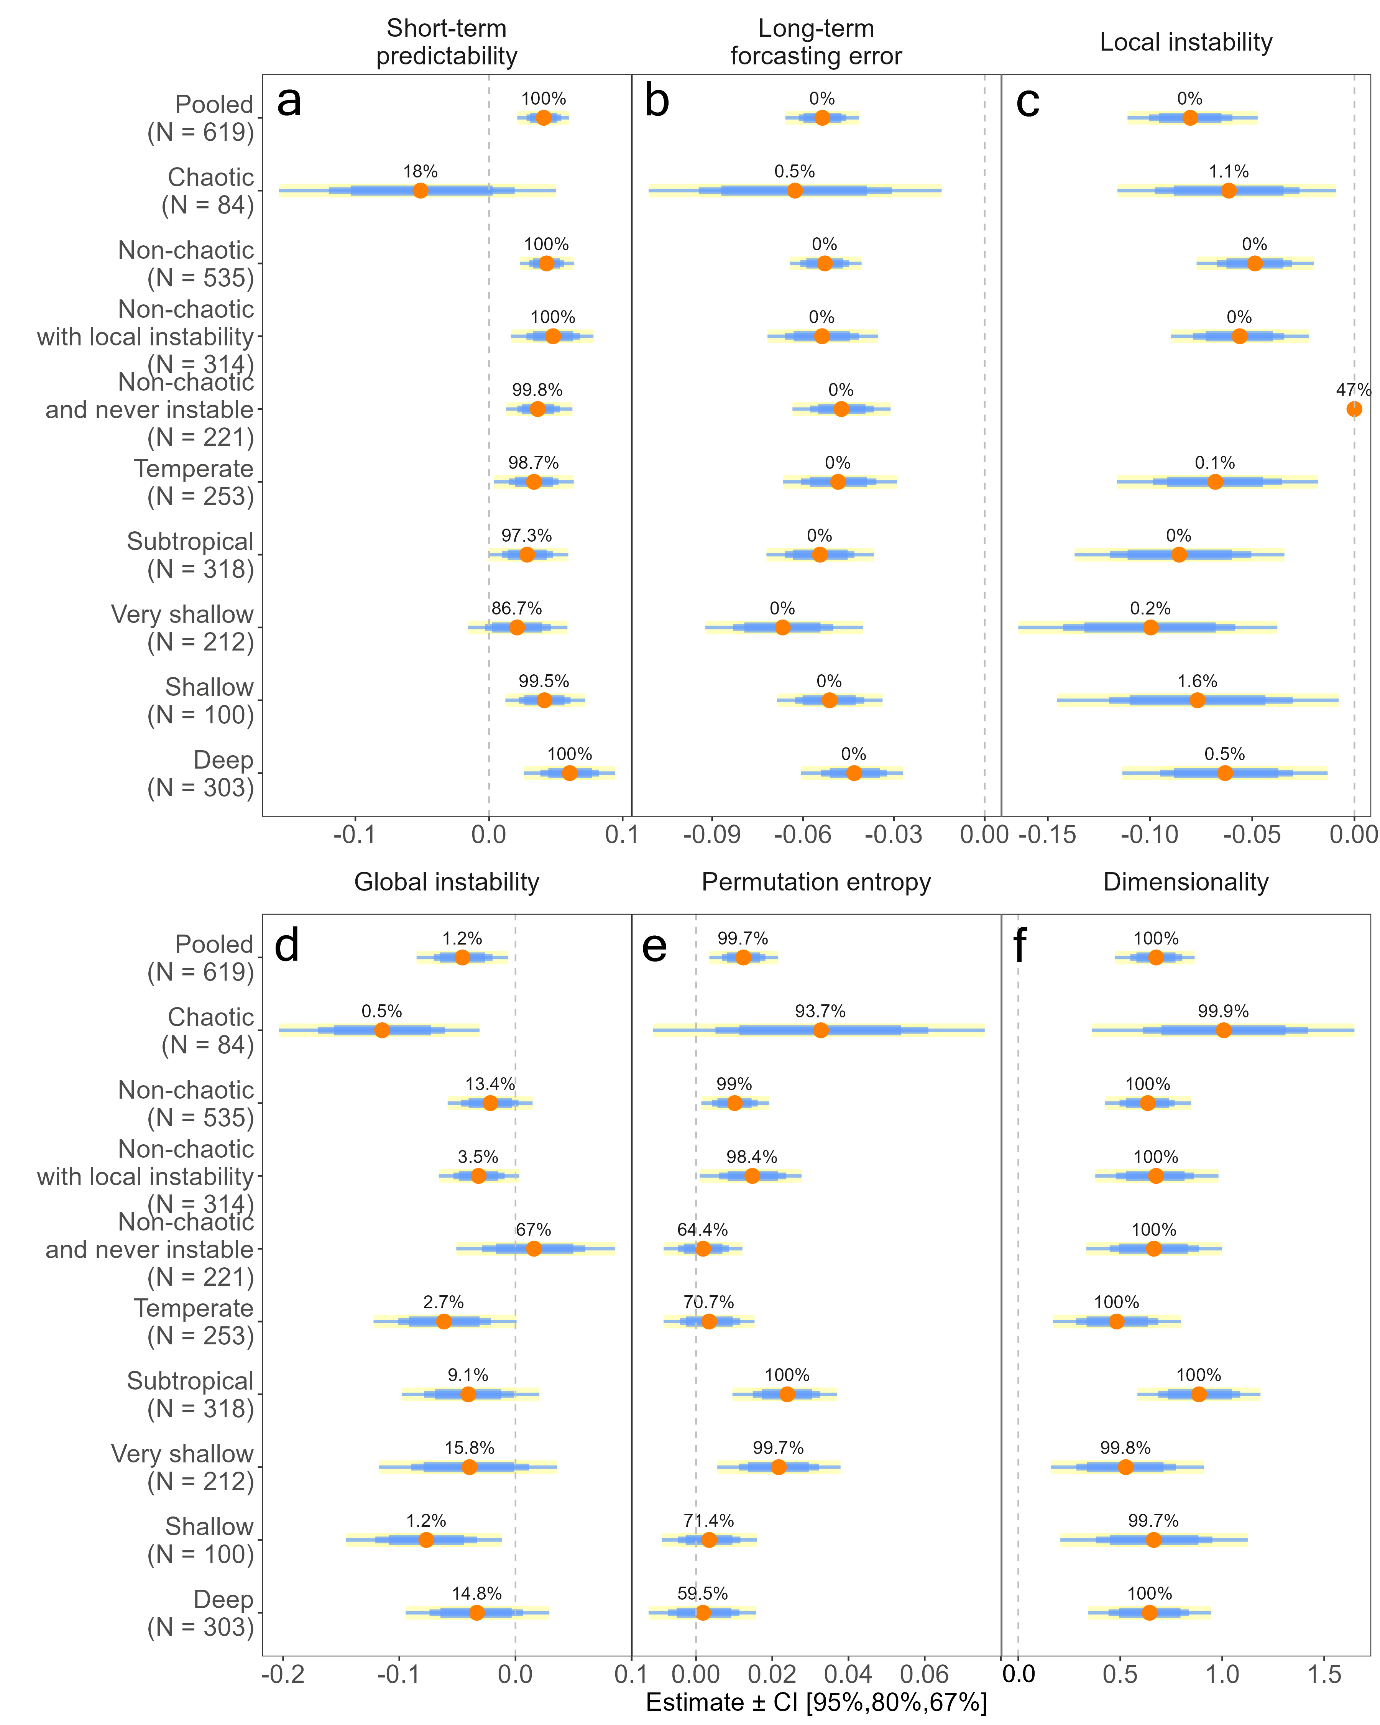


**Supplementary Figure 23 Influences of effect library size on the dynamic properties of chl-*a* time series.** Impacts of the effect library size on short-term predictability **(a)**, long-term forecasting error **(b)**, local **(c)** and global instability **(d)**, permutation entropy **(e)** and dimensionality **(f)** across all lakes combined and for various data subsets. Orange dots are marginal posterior means, bands in blue shades show 67, 80 and 95% credible intervals centered on the mean, and numbers refer to proportions of the posterior distribution greater than zero, estimated by hierarchical Bayesian models with random effects of sites nested within lakes.


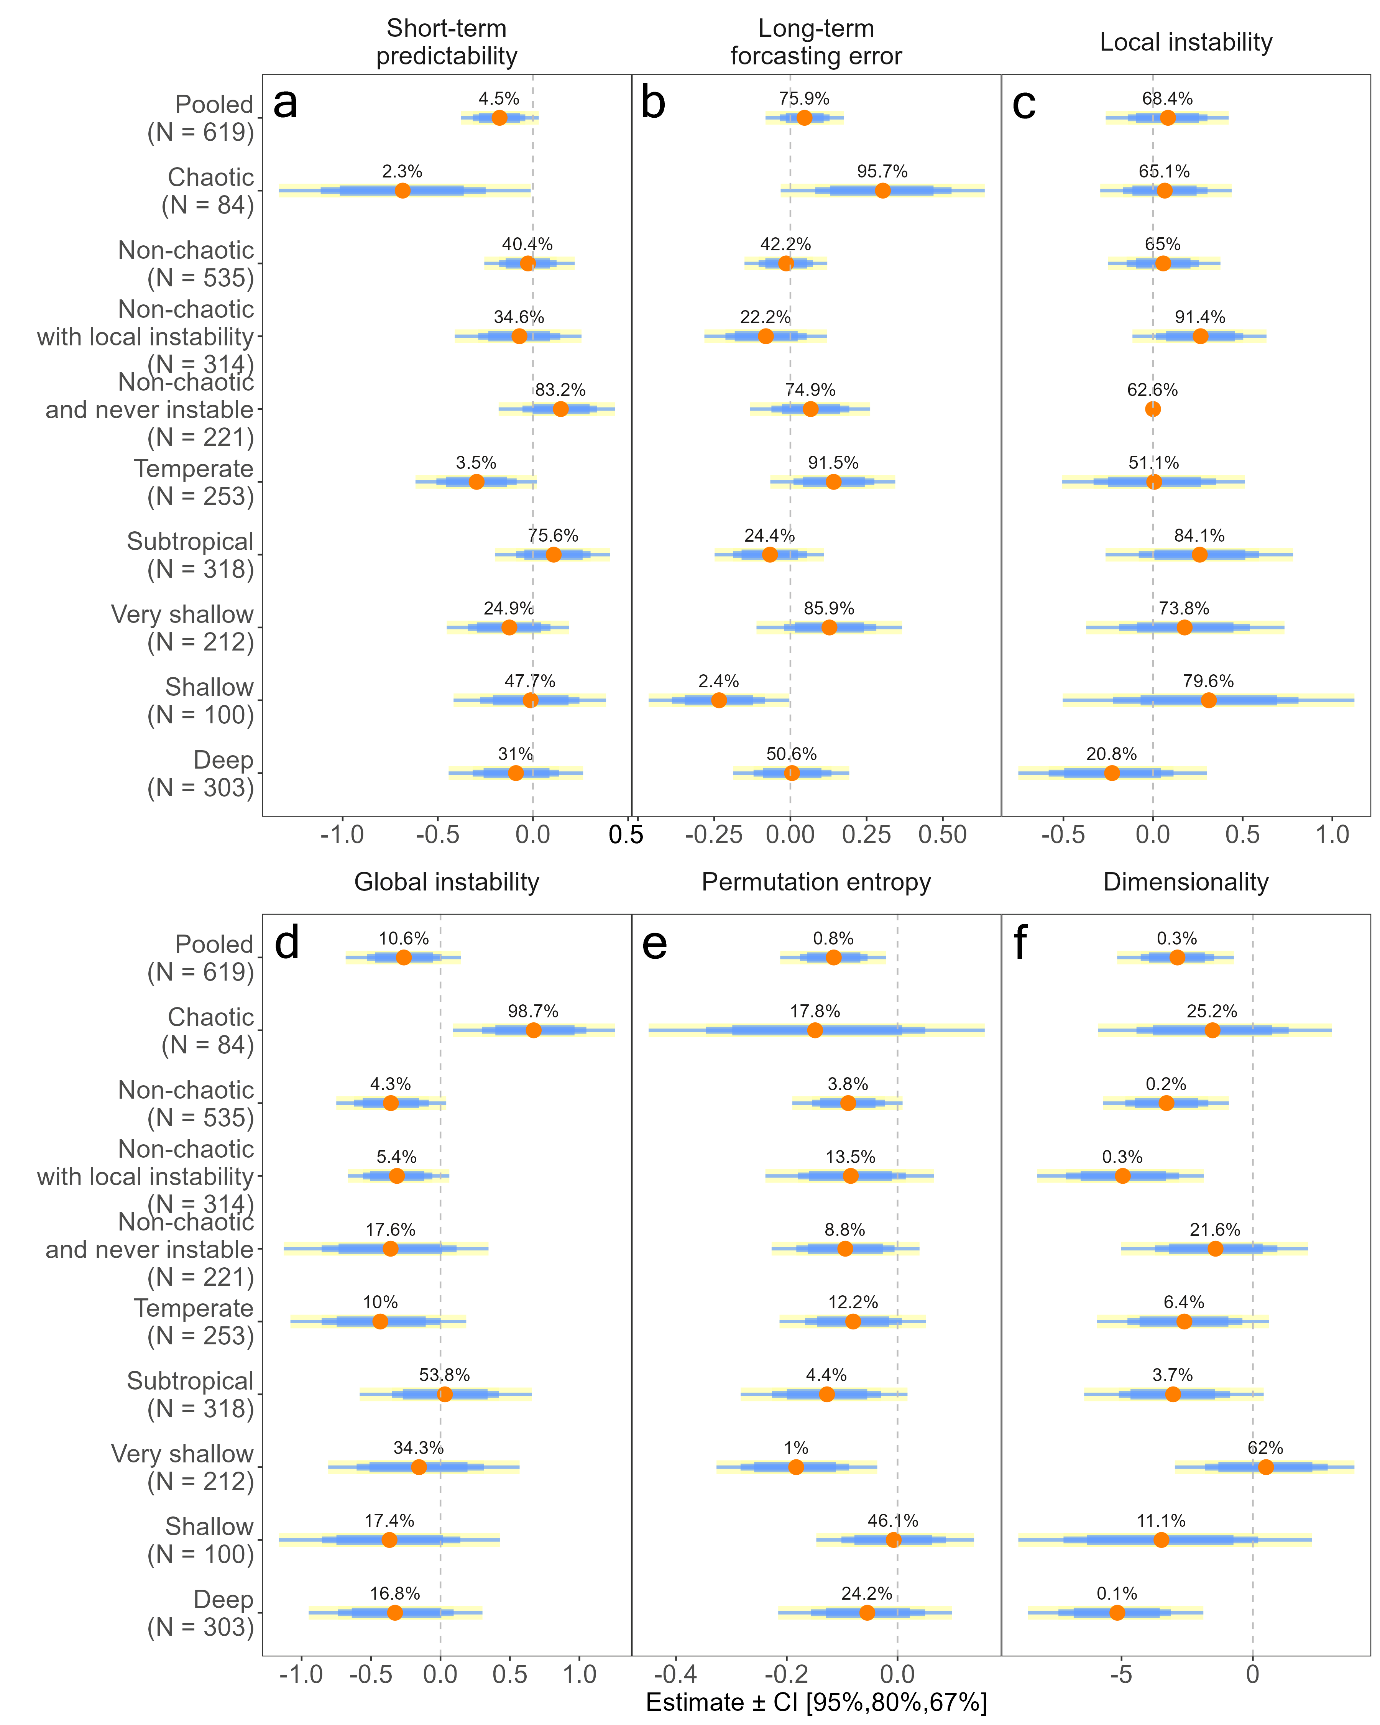


**Supplementary Figure 24 Influences of the proportion of missing values on the dynamic properties of chl-*a* time series.** Effects of the proportion of missing values on short-term predictability (**a**), long-term forecasting error (**b**), local (**c**) and global instability (**d**), permutation entropy (**e**) and dimensionality (**f**) across all lakes combined and for various data subsets. Orange dots are marginal posterior means, bands in blue shades show 67, 80 and 95% credible intervals centered on the mean, and numbers refer to proportions of the posterior distribution greater than zero, estimated by hierarchical Bayesian models with random effects of sites nested within lakes.


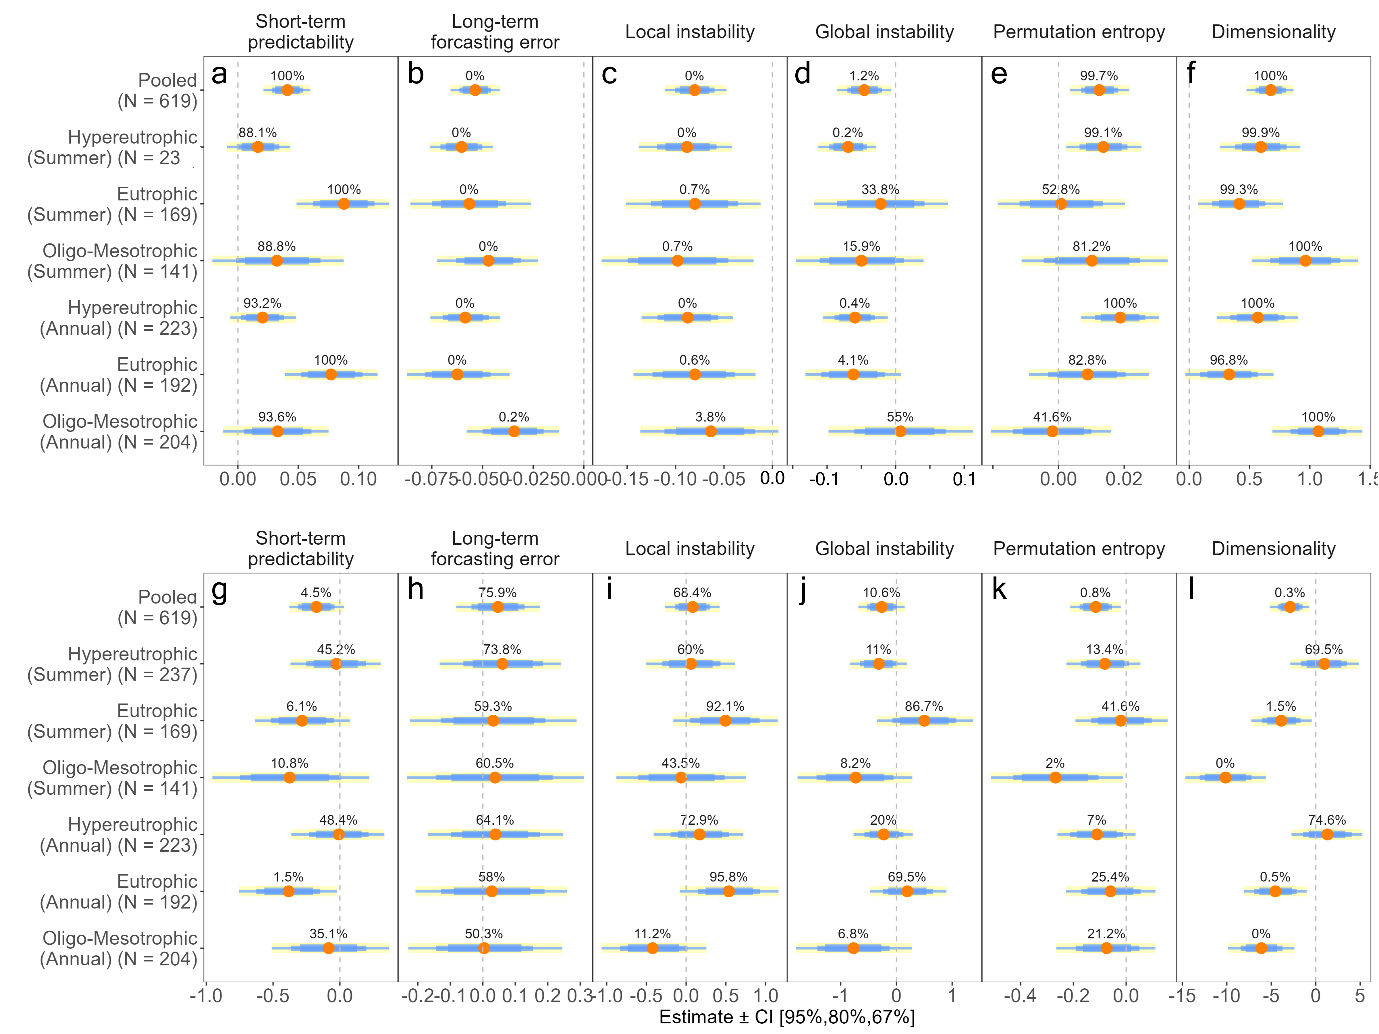


**Supplementary Figure 25 Effects of data** **quality on the dynamic properties of chl-*a* time series.** Effects of the effect library size (**a-f**), proportion of missing values (**g-l**) on short-term predictability, long-term forecasting error, local and global instability, permutation entropy and dimensionality across subsets of lakes with varying trophic status. The lakes were classified as oligo-mesotrophic (chl *a* ≤ 7 μg L−1), eutrophic (7 < chl *a* ≤ 30 μg L−1) and hypereutrophic (chl *a* > 30 μg L−1), where chl *a* were summer mean and annual mean values, respectively. Orange dots are marginal posterior means, bands in blue shades show 67, 80 and 95% credible intervals centered on the mean, and numbers refer to proportions of the posterior distribution greater than zero, estimated by hierarchical Bayesian models with random effects of sites nested within lakes.


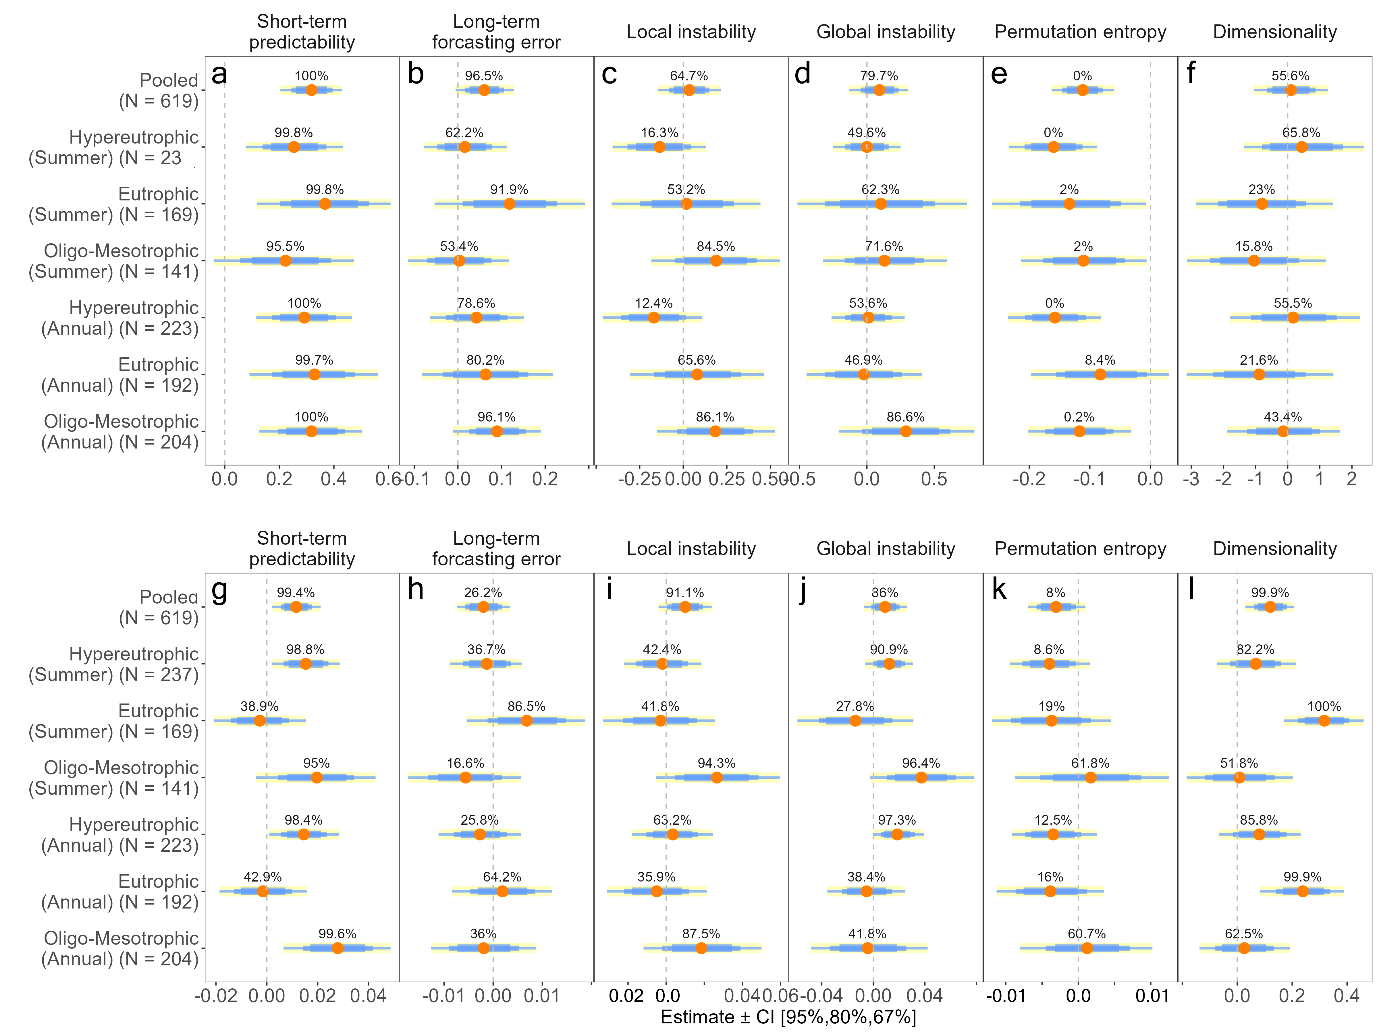


**Supplementary Figure 26 Feedback loop consequences for the dynamic properties of chl-*a* time series across lakes with distinct trophic status.** Effects of mean loop weight **(a-f)** and maximum loop length **(g-l)** on short-term predictability, long-term forecasting error, local and global instability, permutation entropy and dimensionality across subsets of lakes with varying trophic status. The lakes were classified as oligo-mesotrophic (chl *a* ≤ 7 μg L−1), eutrophic (7 < chl *a* ≤ 30 μg L−1) and hypereutrophic (chl *a* > 30 μg L−1) using summer mean and annual mean chl *a* values, respectively. Orange dots are marginal posterior means, bands in blue shades show 67, 80 and 95% credible intervals centered on the mean, and numbers refer to proportions of the posterior distribution greater than zero, estimated by hierarchical Bayesian models with random effects of sites nested within lakes.
