# Supplementary material for: Feedback loops mediating warming effects on complexity, instability and predictability of phytoplankton biomass dynamics in globally distributed lakes
Source: Research Square preprint supplement (doi:10.21203/rs.3.rs-6607784/v1), 2025-06-04
Supplement: Supplementary file 2 [file fa95a9873bd7ea952f78557e.xlsx]

## Sheet: Lake_info
Lakeid	Lake	Area_km2	MaxDepth	MeanDepth	Longitude	Latitude	Altitude	Country	Region	Climate_zone	Depth	Data_filtered	CCM_filtered	Chl_Loop_filtered	Source_ID
An	Annecy	27.4	82	41	6.16453	45.8727	447	France	Europe	Temperate	Deep	FALSE	FALSE	FALSE	ds01
Gene	Geneva	582	310	152.7	6.5942	46.4535	372	France	Europe	Temperate	Deep	TRUE	TRUE	TRUE	ds01
Cham	Champlain	1130	100	19.4	-73.2992	44.471	28	USA	North America	Temperate	Deep	FALSE	FALSE	FALSE	ds02
62003	VESTERBORG SO	0.208	2.9	1.4	11.2738	54.865	-2	Denmark	Europe	Temperate	Very shallow	TRUE	TRUE	TRUE	ds03
42003	STORE SOGORD SO	0.601	6.6	2.7	9.44618	54.9357	32	Denmark	Europe	Temperate	Very shallow	TRUE	TRUE	TRUE	ds03
45003	ARRESKOV SO	3.17	3.7	1.9	10.3112	55.1612	26	Denmark	Europe	Temperate	Very shallow	TRUE	TRUE	TRUE	ds03
46007	SOHOLM SO	0.264	14.7	6.5	10.1312	55.274	49	Denmark	Europe	Temperate	Deep	TRUE	TRUE	TRUE	ds03
36005	SOGORD SO, JYLLAND	0.267	2.7	1.55	9.32155	55.4293	33	Denmark	Europe	Temperate	Very shallow	TRUE	TRUE	TRUE	ds03
55002	TISSO	12.33	13.5	8.2	11.2895	55.5868	-1	Denmark	Europe	Temperate	Deep	TRUE	TRUE	TRUE	ds03
51004	MAGLESO V. BRORFELDE	0.148	6	3.6	11.6921	55.6333	51	Denmark	Europe	Temperate	Shallow	TRUE	TRUE	TRUE	ds03
30005	HOLM SO	0.12	1.8	0.79	8.20714	55.6453	9	Denmark	Europe	Temperate	Very shallow	TRUE	TRUE	TRUE	ds03
53017	UTTERSLEV MOSE	0.296	1.7	1.1	12.5074	55.7183	15	Denmark	Europe	Temperate	Very shallow	TRUE	TRUE	TRUE	ds03
32004	ENGELSHOLM SO	0.439	6.1	2.6	9.31947	55.7194	54	Denmark	Europe	Temperate	Very shallow	TRUE	TRUE	TRUE	ds03
31005	KVIE SO	0.3	2.6	1.21	8.77008	55.7254	24	Denmark	Europe	Temperate	Very shallow	TRUE	TRUE	TRUE	ds03
52005	OSTRUP.GUNDSOMAGLE SO	0.32	1.9	1.2	12.1909	55.7275	2	Denmark	Europe	Temperate	Very shallow	TRUE	TRUE	TRUE	ds03
50002	FURESOEN STORESO	7.39	37.7	16.5	12.4158	55.8007	19	Denmark	Europe	Temperate	Deep	TRUE	TRUE	TRUE	ds03
49001	ARRESO	39.87	5.9	3.07	12.1089	55.9922	2	Denmark	Europe	Temperate	Shallow	TRUE	TRUE	TRUE	ds03
21324	BRYRUP LANGSO	0.38	9	4.57	9.53045	56.0161	62	Denmark	Europe	Temperate	Shallow	TRUE	TRUE	TRUE	ds03
25044	SOBY SO, MIDTJYLLAND	0.73	6.5	2.8	9.07255	56.0513	38	Denmark	Europe	Temperate	Very shallow	TRUE	TRUE	TRUE	ds03
21321	RAVNSO	1.82	33	15	9.84442	56.1064	21	Denmark	Europe	Temperate	Deep	TRUE	TRUE	TRUE	ds03
21278	HINGE SO	0.914	2.6	1.23	9.50068	56.2565	24	Denmark	Europe	Temperate	Very shallow	TRUE	TRUE	TRUE	ds03
13002	HORNUM SO	0.224	1.46	2.6	9.74808	56.9022	47	Denmark	Europe	Temperate	Very shallow	TRUE	TRUE	TRUE	ds03
1009	NORSSO	3.469	19.5	3.71	8.60986	57.0304	12	Denmark	Europe	Temperate	Shallow	TRUE	TRUE	TRUE	ds03
Dong	Donghu	33	5.9	2.2	114.385	30.5608	20	China	Asia	Subtropical	Very shallow	TRUE	TRUE	TRUE	ds04
Taih	Taihu	2428	2.6	2	120.171	31.2482	2	China	Asia	Subtropical	Very shallow	TRUE	TRUE	TRUE	ds04
Erha	Erhai	250	21.5	10.5	100.19	25.7598	1972	China	Asia	Subtropical	Deep	TRUE	TRUE	TRUE	ds05
Apop	Apopka	127	5.1	1.4	-81.6249	28.625	20	USA	North America	Subtropical	Very shallow	TRUE	TRUE	TRUE	ds06
Harr	Harris	85.5	31	3.5	-81.8085	28.7558	18.62	USA	North America	Subtropical	Shallow	TRUE	TRUE	TRUE	ds06
BeauC	Beauclair	4.56	3.6	2.4	-81.6684	28.7717	19	USA	North America	Subtropical	Very shallow	TRUE	TRUE	TRUE	ds06
Dora	Dora	17.746	4.572	2.4384	-81.6569	28.7929	19	USA	North America	Subtropical	Very shallow	FALSE	FALSE	FALSE	ds06
Eust	Eustis	31.5	6.4	3.1	-81.7331	28.8431	20	USA	North America	Subtropical	Shallow	TRUE	TRUE	TRUE	ds06
Grif	Griffin	38.3	6.1	2.4	-81.8483	28.864	17	USA	North America	Subtropical	Very shallow	TRUE	TRUE	TRUE	ds06
Yale	Yale	16	7.6	5.1	-81.7266	28.9078	20	USA	North America	Subtropical	Deep	TRUE	TRUE	TRUE	ds06
Geor	George	190	7.3	2.8	-81.5912	29.255	19	USA	North America	Subtropical	Very shallow	TRUE	TRUE	TRUE	ds06
Kasu	Kasumigaura	171	7	3.4	140.404	36.0357	0.2	Japan	Asia	Subtropical	Shallow	TRUE	TRUE	TRUE	ds07
Mashu	Mashu	19.6	212	145.9	144.531	43.588	351	Japan	Asia	Temperate	Deep	FALSE	FALSE	FALSE	ds08
Jockeybush	Jockeybush	0.173	11.3	4.5	-74.5914	43.3028	599	USA	North America	Temperate	Shallow	TRUE	TRUE	FALSE	ds09
Willis	Willis	0.146	2.7	1.6	-74.2432	43.3696	400	USA	North America	Temperate	Very shallow	TRUE	TRUE	FALSE	ds09
G	G	0.322	9.8	4.5	-74.6339	43.4171	620	USA	North America	Temperate	Shallow	TRUE	TRUE	FALSE	ds09
South	South	1.974	18.3	8.3	-74.8759	43.511	615	USA	North America	Temperate	Deep	TRUE	TRUE	FALSE	ds09
North	North	1.768	17.7	5.7	-74.9396	43.5277	555	USA	North America	Temperate	Deep	TRUE	TRUE	FALSE	ds09
Brooktrout	Brooktrout	0.287	23.2	8.4	-74.6606	43.601	724	USA	North America	Temperate	Deep	TRUE	TRUE	FALSE	ds09
Indian	Indian	0.322	10.7	3	-74.7607	43.6229	654	USA	North America	Temperate	Shallow	TRUE	TRUE	FALSE	ds09
Squaw	Squaw	0.364	6.7	3.4	-74.7396	43.6351	646	USA	North America	Temperate	Shallow	TRUE	TRUE	FALSE	ds09
Carry	Carry	0.028	4.6	2.2	-74.4886	43.682	652	USA	North America	Temperate	Very shallow	TRUE	TRUE	FALSE	ds09
Middle Settlement	Middle Settlement	0.158	11	3.4	-75.1014	43.6828	526	USA	North America	Temperate	Shallow	TRUE	TRUE	FALSE	ds09
Grass	Grass	0.053	5.2	1.5	-75.0608	43.693	549	USA	North America	Temperate	Very shallow	TRUE	TRUE	FALSE	ds09
Middle Branch	Middle Branch	0.17	5.2	2.1	-75.1009	43.6991	496	USA	North America	Temperate	Very shallow	TRUE	TRUE	FALSE	ds09
Limekiln	Limekiln	1.869	21.9	6.1	-74.7992	43.7139	575	USA	North America	Temperate	Deep	TRUE	TRUE	FALSE	ds09
Rondaxe	Rondaxe	0.905	10.1	3	-74.9109	43.7603	524	USA	North America	Temperate	Shallow	TRUE	TRUE	FALSE	ds09
Sagamore	Sagamore	0.68	22.9	10.5	-74.6187	43.768	580	USA	North America	Temperate	Deep	TRUE	TRUE	FALSE	ds09
Moss	Moss	0.457	15.2	5.7	-74.8492	43.7854	536	USA	North America	Temperate	Deep	TRUE	TRUE	FALSE	ds09
Cascade	Cascade	0.404	6.1	4.2	-74.812	43.7891	557	USA	North America	Temperate	Shallow	TRUE	TRUE	FALSE	ds09
Raquette	Raquette	0.015	3	1.6	-74.6513	43.7949	564	USA	North America	Temperate	Very shallow	TRUE	TRUE	FALSE	ds09
Dart	Dart	0.518	17.7	7.3	-74.8627	43.7962	537	USA	North America	Temperate	Deep	TRUE	TRUE	FALSE	ds09
Windfall	Windfall	0.024	6.1	3.2	-74.8287	43.8055	591	USA	North America	Temperate	Shallow	TRUE	TRUE	FALSE	ds09
Queer	Queer	0.545	21.3	10.9	-74.8035	43.806	597	USA	North America	Temperate	Deep	TRUE	TRUE	FALSE	ds09
West	West	0.104	5.2	1.5	-74.883	43.8119	581	USA	North America	Temperate	Very shallow	TRUE	TRUE	FALSE	ds09
Squash	Squash	0.033	5.8	1.4	-74.8861	43.8256	635	USA	North America	Temperate	Very shallow	TRUE	TRUE	FALSE	ds09
Big Moose	Big Moose	5.13	21.3	6.8	-74.8592	43.8265	558	USA	North America	Temperate	Deep	TRUE	TRUE	FALSE	ds09
Constable	Constable	0.206	4	2.1	-74.7968	43.8339	580	USA	North America	Temperate	Very shallow	TRUE	TRUE	FALSE	ds09
Long	Long	0.017	4	2	-74.4798	43.8375	574	USA	North America	Temperate	Very shallow	TRUE	TRUE	FALSE	ds09
Loon Hollow	Loon Hollow	0.057	11.6	3.4	-75.0425	43.9636	605	USA	North America	Temperate	Shallow	TRUE	TRUE	FALSE	ds09
Willys	Willys	0.243	13.7	4.9	-74.9574	43.9708	632	USA	North America	Temperate	Shallow	TRUE	TRUE	FALSE	ds09
KE	Kegonsa	12.987	9.8	5.2	-89.2369	42.9906	261	USA	North America	Temperate	Deep	TRUE	TRUE	FALSE	ds10
WA	Waubesa	16.43	14.33	7.93	-89.2854	43.0109	259	USA	North America	Temperate	Deep	TRUE	TRUE	FALSE	ds10
WI	Wingra	1.362	4.2	2.7	-89.425	43.053	259	USA	North America	Temperate	Very shallow	TRUE	TRUE	FALSE	ds10
MO	Monona	13.598	22.5	8.2	-89.361	43.063	258	USA	North America	Temperate	Deep	TRUE	TRUE	FALSE	ds10
ME	Mendota	39.612	25.3	12.8	-89.405	43.099	259	USA	North America	Temperate	Deep	TRUE	TRUE	FALSE	ds10
FI	Fish	0.804	18.9	6.6	-89.652	43.287	261	USA	North America	Temperate	Deep	TRUE	TRUE	FALSE	ds10
CR	Crystal	0.375	20.4	10.4	-89.612	46.003	502	USA	North America	Temperate	Deep	TRUE	TRUE	TRUE	ds10
CB	CB	0.006	2.5	1.7	-89.606	46.008	503	USA	North America	Temperate	Very shallow	TRUE	TRUE	TRUE	ds10
SP	Sparkling	0.637	20	10.9	-89.701	46.008	495	USA	North America	Temperate	Deep	TRUE	TRUE	TRUE	ds10
BM	Big Muskellunge	3.634	21.3	7.5	-89.612	46.021	500	USA	North America	Temperate	Deep	TRUE	TRUE	TRUE	ds10
TR	Trout	15.651	35.7	14.6	-89.665	46.029	492	USA	North America	Temperate	Deep	TRUE	TRUE	TRUE	ds10
AL	Allequash	1.642	8	2.9	-89.621	46.038	494	USA	North America	Temperate	Very shallow	TRUE	TRUE	TRUE	ds10
TB	TB	0.01	7.9	5.6	-89.686	46.041	499	USA	North America	Temperate	Deep	TRUE	TRUE	TRUE	ds10
Peip	Peipsi	3555	15.3	7.1	27.3717	58.8094	30	Estonian	Europe	Temperate	Deep	TRUE	TRUE	TRUE	ds11
Poya	Poyang	3150	22	8.4	116.372	29.078	10	China	Asia	Subtropical	Deep	FALSE	FALSE	FALSE	ds12
Stec	Stechlin	4.23	69.5	23.3	13.0262	53.1516	59	Germany	Europe	Temperate	Deep	TRUE	TRUE	TRUE	ds13
Vatt	Vättern	1893	128	19.9	14.5692	58.4051	88	Sweden	Europe	Temperate	Deep	TRUE	TRUE	TRUE	ds14
Vane	Vänern	5648	106	27	13.5077	58.9443	44	Sweden	Europe	Temperate	Deep	TRUE	TRUE	TRUE	ds14
ER	Erie	25700	64	19	-81.575	42.11	174	USA/Canada	North America	Temperate	Deep	TRUE	TRUE	TRUE	ds15
ON	Ontario	19000	244	86	-77.2035	43.58	75	USA/Canada	North America	Temperate	Deep	TRUE	TRUE	TRUE	ds15
MI	Michigan	58000	282	85	-86.9192	43.5922	176	USA	North America	Temperate	Deep	TRUE	TRUE	TRUE	ds15
HU	Huron	59600	229	59	-82.7833	44.7617	176	USA/Canada	North America	Temperate	Deep	TRUE	TRUE	TRUE	ds15
SU	Superior	82100	406	147	-86.8177	47.6036	182.9	USA/Canada	North America	Temperate	Deep	TRUE	TRUE	TRUE	ds15
Mark	Markermeer	700	5	4.5	5.23911	52.5162	-0.2	The Netherlands	Europe	Temperate	Shallow	TRUE	TRUE	TRUE	ds16
IJss	IJsselmeer	1100	9	4.5	5.41832	52.6697	-0.2	The Netherlands	Europe	Temperate	Shallow	TRUE	TRUE	TRUE	ds16
Alto	Alton Pond		4.2		-71.7216	41.4382	14.3	USA	North America	Temperate	Very shallow	TRUE	TRUE	TRUE	ds17
Mead	Meadowbrook Pond (Sandy Pond)	0.0934	3		-71.6911	41.4399	16.3	USA	North America	Temperate	Very shallow	FALSE	FALSE	FALSE	ds17
Spau	Spaulding Pond		2.3		-71.8306	41.4471	0	USA	North America	Temperate	Very shallow	FALSE	FALSE	FALSE	ds17
Saug	Saugatucket Pond	0.1647	3		-71.495	41.4536	8.5	USA	North America	Temperate	Very shallow	FALSE	FALSE	FALSE	ds17
Asa	Asa Pond		2.1		-71.5127	41.459	31.1	USA	North America	Temperate	Very shallow	FALSE	FALSE	FALSE	ds17
Hund	Hundred Acre Pond	0.3407	11.6		-71.5427	41.4999	29.1	USA	North America	Temperate	Shallow	TRUE	TRUE	TRUE	ds17
Quee	Queen River @ Usquepaugh (Glen Rock Reservoir)	0.1225	2.8		-71.6062	41.5079	33.6	USA	North America	Temperate	Very shallow	TRUE	TRUE	TRUE	ds17
Locu	Locustville Pond	0.3332	4		-71.7172	41.5102	28.3	USA	North America	Temperate	Very shallow	FALSE	FALSE	FALSE	ds17
Wyom	Wyoming Pond		3.6		-71.7024	41.5162	29.4	USA	North America	Temperate	Very shallow	FALSE	FALSE	FALSE	ds17
Silv	Silver Spring Lake	0.0759	4.2		-71.4699	41.5385	11	USA	North America	Temperate	Very shallow	FALSE	FALSE	FALSE	ds17
Anna	Annaquatucket Mill Pond		1		-71.4413	41.5505	5.1	USA	North America	Temperate	Very shallow	FALSE	FALSE	FALSE	ds17
Secr	Secret Lake	0.1871	3.4		-71.4806	41.555	15.2	USA	North America	Temperate	Very shallow	TRUE	TRUE	TRUE	ds17
Brea	Breakheart Pond	0.1773	2.8		-71.7018	41.5965	71.3	USA	North America	Temperate	Very shallow	FALSE	FALSE	FALSE	ds17
Quid	Quidnick Reservoir	0.702	11		-71.6794	41.6791	145	USA	North America	Temperate	Very shallow	FALSE	FALSE	FALSE	ds17
Tiog	Tiogue Lake	0.916	3.4		-71.5509	41.6791	69	USA	North America	Temperate	Very shallow	TRUE	TRUE	TRUE	ds17
Flat	Flat River Reservoir (Johnson Pond)	2.4629	10.2		-71.6051	41.6855	75.2	USA	North America	Temperate	Very shallow	TRUE	TRUE	TRUE	ds17
Cove	Coventry Reservoir (Stump Pond)	0.6801	4		-71.6403	41.6928	91.5	USA	North America	Temperate	Very shallow	FALSE	FALSE	FALSE	ds17
Roge	Roger Williams Park Pond (Cunliff Lake)		1.7		-71.413	41.7785	8.3	USA	North America	Temperate	Very shallow	FALSE	FALSE	FALSE	ds17
Will	Willow/Pleasure Bridge (RWP 4)		1		-71.4139	41.7841	8.3	USA	North America	Temperate	Very shallow	FALSE	FALSE	FALSE	ds17
Plea	Pleasure Pond (a Roger William Park Pond)		2.7		-71.412	41.7849	8.3	USA	North America	Temperate	Very shallow	FALSE	FALSE	FALSE	ds17
Oak	Oak Swamp Reservoir	0.4427	3		-71.541	41.8273	108.7	USA	North America	Temperate	Very shallow	FALSE	FALSE	FALSE	ds17
Turn	Turner Reservoir (south)		3		-71.3398	41.84	14.6	USA	North America	Temperate	Very shallow	FALSE	FALSE	FALSE	ds17
Cent	Central Pond (Turner North)		2		-71.3432	41.8478	14.5	USA	North America	Temperate	Very shallow	FALSE	FALSE	FALSE	ds17
Slac	Slack's Reservoir		4.6		-71.5517	41.8595	83.4	USA	North America	Temperate	Very shallow	FALSE	FALSE	FALSE	ds17
Pona	Ponagansett Reservoir		9.2		-71.7426	41.8723	196.3	USA	North America	Temperate	Very shallow	FALSE	FALSE	FALSE	ds17
Wens	Wenscott Reservoir	0.3352	3		-71.464	41.8727	63.3	USA	North America	Temperate	Very shallow	FALSE	FALSE	FALSE	ds17
Keec	Keech Pond	0.1994	4.2		-71.6884	41.8791	132	USA	North America	Temperate	Very shallow	TRUE	TRUE	TRUE	ds17
Wate	Waterman Reservoir	1.0196	2.1		-71.5895	41.8815	100.1	USA	North America	Temperate	Very shallow	TRUE	TRUE	TRUE	ds17
Lowe	Lower Sprague Reservoir	0.1017	3.5		-71.5484	41.8878	72.1	USA	North America	Temperate	Very shallow	FALSE	FALSE	FALSE	ds17
Smit	Smith and Sayles Reservoir	0.6994	3.4		-71.6821	41.8935	129.1	USA	North America	Temperate	Very shallow	FALSE	FALSE	FALSE	ds17
Vall	Valley Falls Pond		0.7		-71.3984	41.8952	14.8	USA	North America	Temperate	Very shallow	FALSE	FALSE	FALSE	ds17
Barn	Barney Pond	0.0965	4		-71.4176	41.897	22	USA	North America	Temperate	Very shallow	FALSE	FALSE	FALSE	ds17
Scot	Scott Pond	0.1369	18		-71.407	41.8984	21.6	USA	North America	Temperate	Deep	FALSE	FALSE	FALSE	ds17
Geor	Georgiaville Pond	0.3923	7		-71.5217	41.9028	46.2	USA	North America	Temperate	Very shallow	TRUE	TRUE	TRUE	ds17
Woon	Woonasquatucket Reservoir (Stump Pond)	1.2259	4.6		-71.5447	41.9061	62.9	USA	North America	Temperate	Very shallow	FALSE	FALSE	FALSE	ds17
Stil	Stillwater Pond	0.101	4.5		-71.5273	41.9083	59.4	USA	North America	Temperate	Very shallow	FALSE	FALSE	FALSE	ds17
Bowd	Bowdish Reservoir	0.8988	3.5		-71.7706	41.9229	173.4	USA	North America	Temperate	Very shallow	FALSE	FALSE	FALSE	ds17
Pasc	Pascoag Reservoir (Echo Lake)		5.8		-71.706	41.9446	134	USA	North America	Temperate	Very shallow	FALSE	FALSE	FALSE	ds17
Hand	Handy Pond (Rochambeau Pond)	0.0326	3.4		-71.472	41.9586	58.3	USA	North America	Temperate	Very shallow	FALSE	FALSE	FALSE	ds17
Wils	Wilson Reservoir	0.4425	4		-71.7272	41.9679	133.6	USA	North America	Temperate	Very shallow	FALSE	FALSE	FALSE	ds17
Slat	Slatersville Reservoir - Upper		5.5		-71.5956	41.993	76.3	USA	North America	Temperate	Very shallow	FALSE	FALSE	FALSE	ds17
Kinn	Kinneret	168.7	41.7	25.6	35.5781	32.8156	-210	Israel	Asia	Subtropical	Deep	TRUE	TRUE	TRUE	ds18
Chen	Cheney	40.1448	12.5	5.1	-97.7939	37.7261	433.12	USA	North America	Subtropical	Deep	TRUE	TRUE	TRUE	ds18
Samm	Sammamish	7.8	32	13.1	-122.096	47.5912	6.9	USA	North America	Temperate	Deep	TRUE	TRUE	TRUE	ds19
Wash	Washington	88	65.2	32.9	-122.235	47.6868	4.5	USA	North America	Temperate	Deep	TRUE	TRUE	TRUE	ds19
NZ Waip	NZ Waipara	0.02	4.8		172.854	-34.5861	77	New Zealand	Oceania	Subtropical	Very shallow	TRUE	TRUE	TRUE	ds20
NZ Te K	NZ Te Kahika	0.145	10.8		173.001	-34.6236	16	New Zealand	Oceania	Subtropical	Very shallow	TRUE	TRUE	TRUE	ds20
NZ More	NZ Morehurehu	0.359	14.1		172.996	-34.642	17	New Zealand	Oceania	Subtropical	Shallow	TRUE	TRUE	TRUE	ds20
NZ Waih	NZ Waihopo	0.035	3.6		173.043	-34.7559	35	New Zealand	Oceania	Subtropical	Very shallow	TRUE	TRUE	TRUE	ds20
NZ Waip	NZ Waiporohita	0.069	3.7		173.348	-34.9014	14	New Zealand	Oceania	Subtropical	Very shallow	TRUE	TRUE	TRUE	ds20
NZ Waip	NZ Waiparera	1.086	6.5		173.179	-34.9412	31	New Zealand	Oceania	Subtropical	Very shallow	TRUE	TRUE	TRUE	ds20
NZ Roto	NZ Rotokawau	0.152	3		173.206	-35.0182	51	New Zealand	Oceania	Subtropical	Very shallow	TRUE	TRUE	TRUE	ds20
NZ Ngak	NZ Ngakapua	0.061	4.9		173.191	-35.019	56	New Zealand	Oceania	Subtropical	Very shallow	TRUE	TRUE	TRUE	ds20
NZ Carr	NZ Carrot	0.021	7.8		173.187	-35.0223	55	New Zealand	Oceania	Subtropical	Very shallow	TRUE	TRUE	TRUE	ds20
NZ Ngat	NZ Ngatu	0.517	6.1		173.199	-35.0358	37	New Zealand	Oceania	Subtropical	Very shallow	TRUE	TRUE	TRUE	ds20
NZ Heat	NZ Heather	0.083	4.5		173.191	-35.0531	38	New Zealand	Oceania	Subtropical	Very shallow	TRUE	TRUE	TRUE	ds20
NZ Waik	NZ Waikare	34.42	2.7		173.63	-35.7989	7	New Zealand	Oceania	Subtropical	Very shallow	TRUE	TRUE	TRUE	ds20
NZ Taha	NZ Taharoa	2.37	38		173.646	-35.8079	78	New Zealand	Oceania	Subtropical	Deep	TRUE	TRUE	TRUE	ds20
NZ Kai	NZ Kai iwi	0.268	15		173.654	-35.8157	78	New Zealand	Oceania	Subtropical	Shallow	TRUE	TRUE	TRUE	ds20
NZ Wain	NZ Wainui	0.038	11.5		173.882	-36.1014	40	New Zealand	Oceania	Subtropical	Shallow	TRUE	TRUE	TRUE	ds20
NZ Toma	NZ Tomarata	0.144	5.6		174.649	-36.1927	33	New Zealand	Oceania	Subtropical	Very shallow	TRUE	TRUE	TRUE	ds20
NZ Roto	NZ Rototuna	0.089	3.5		174.04	-36.251	119	New Zealand	Oceania	Subtropical	Very shallow	TRUE	TRUE	TRUE	ds20
NZ Kara	NZ Karaka	0.106	5.8		174.038	-36.3139	6	New Zealand	Oceania	Subtropical	Very shallow	TRUE	TRUE	TRUE	ds20
NZ Humu	NZ Humuhumu	1.396	15		174.129	-36.3281	51	New Zealand	Oceania	Subtropical	Shallow	TRUE	TRUE	TRUE	ds20
Swan La	Swan Lake	0.172	6		174.142	-36.3309	37	New Zealand	Oceania	Subtropical	Very shallow	TRUE	TRUE	TRUE	ds20
NZ Moke	NZ Mokeno	1.592	6.2		174.061	-36.3516	8	New Zealand	Oceania	Subtropical	Very shallow	TRUE	TRUE	TRUE	ds20
NZ Kano	NZ Kanono	0.771	14.9		174.148	-36.3648	57	New Zealand	Oceania	Subtropical	Shallow	TRUE	TRUE	TRUE	ds20
NZ Kahu	NZ Kahuparere	0.073	7		174.157	-36.3693	58	New Zealand	Oceania	Subtropical	Very shallow	TRUE	TRUE	TRUE	ds20
NZ Roto	NZ Rototoa	1.066	26.1		174.239	-36.5138	76	New Zealand	Oceania	Subtropical	Deep	TRUE	TRUE	TRUE	ds20
NZ Pupu	NZ Pupuke	1.038	57		174.768	-36.7806	14	New Zealand	Oceania	Subtropical	Deep	TRUE	TRUE	TRUE	ds20
NZ Wain	NZ Wainamu	0.15	12.4		174.467	-36.8893	36	New Zealand	Oceania	Subtropical	Shallow	TRUE	TRUE	TRUE	ds20
NZ Puke	NZ Puketi	0.06	6.6		174.676	-37.2792	95	New Zealand	Oceania	Subtropical	Very shallow	TRUE	FALSE	FALSE	ds20
NZ Park	NZ Parkinson	0.02			174.685	-37.3148	104	New Zealand	Oceania	Subtropical		TRUE	FALSE	FALSE	ds20
NZ Whan	NZ Whangape	10.79	3.5		175.058	-37.4632	17	New Zealand	Oceania	Subtropical	Very shallow	TRUE	TRUE	TRUE	ds20
NZ Waiw	NZ Waiwhata	0.0212	1.2		175.094	-37.4639	12	New Zealand	Oceania	Subtropical	Very shallow	FALSE	FALSE	FALSE	ds20
NZ Roto	NZ Rotongarotoiti	3.9			175.106	-37.478	7	New Zealand	Oceania	Subtropical		TRUE	TRUE	TRUE	ds20
NZ Roto	NZ Rotongaro	2.84	3.3		175.121	-37.4864	17	New Zealand	Oceania	Subtropical	Very shallow	TRUE	TRUE	FALSE	ds20
NZ Ohin	NZ Ohinewai	0.1707	4.1		175.173	-37.4946	8	New Zealand	Oceania	Subtropical	Very shallow	TRUE	TRUE	TRUE	ds20
NZ Haka	NZ Hakanoa	0.56	2.5		175.168	-37.5533	15	New Zealand	Oceania	Subtropical	Very shallow	TRUE	TRUE	TRUE	ds20
NZ Waah	NZ Waahi	4.45	5		175.123	-37.571	13	New Zealand	Oceania	Subtropical	Very shallow	TRUE	TRUE	TRUE	ds20
NZ Piko	NZ Pikopiko	0.0468	2.7		175.192	-37.6618	26	New Zealand	Oceania	Subtropical	Very shallow	TRUE	TRUE	TRUE	ds20
NZ Area	NZ Areare	0.3	6.5		175.201	-37.6681	34	New Zealand	Oceania	Subtropical	Very shallow	TRUE	TRUE	TRUE	ds20
NZ Kain	NZ Kainui	0.27	6.7		175.232	-37.6769	31	New Zealand	Oceania	Subtropical	Very shallow	TRUE	TRUE	TRUE	ds20
NZ Kait	NZ Kaituna	0.15	1.3		175.249	-37.6786	34	New Zealand	Oceania	Subtropical	Very shallow	FALSE	FALSE	FALSE	ds20
NZ Whak	NZ Whakatangi	0.028	3.7		175.258	-37.6895	33	New Zealand	Oceania	Subtropical	Very shallow	FALSE	FALSE	FALSE	ds20
NZ Otam	NZ Otamanui	0.0678	2.8		175.132	-37.7192	17	New Zealand	Oceania	Subtropical	Very shallow	TRUE	TRUE	TRUE	ds20
NZ Hors	NZ Horseshoe	0.31	3.2		175.226	-37.7702	176	New Zealand	Oceania	Subtropical	Very shallow	TRUE	TRUE	TRUE	ds20
NZ Roto	NZ Rotoroa	0.52	8		175.277	-37.8006	38	New Zealand	Oceania	Subtropical	Very shallow	TRUE	TRUE	TRUE	ds20
NZ Came	NZ Cameron	0.0472	2.4		175.303	-37.8551	45	New Zealand	Oceania	Subtropical	Very shallow	FALSE	FALSE	FALSE	ds20
NZ Mang	NZ Mangahia	0.08	7		175.229	-37.8793	38	New Zealand	Oceania	Subtropical	Very shallow	FALSE	FALSE	FALSE	ds20
NZ Mara	NZ Maratoto	0.16	7		175.304	-37.8875	56	New Zealand	Oceania	Subtropical	Very shallow	TRUE	TRUE	TRUE	ds20
NZ Te K	NZ Te Ko Utu	0.05	2.3		175.47	-37.8889	56	New Zealand	Oceania	Subtropical	Very shallow	FALSE	FALSE	FALSE	ds20
NZ Okor	NZ Okoroire	0.0345	2.5		175.791	-37.9184	85	New Zealand	Oceania	Subtropical	Very shallow	FALSE	FALSE	FALSE	ds20
NZ Roto	NZ Rotomanuka	0.14	9		175.316	-37.9251	58	New Zealand	Oceania	Subtropical	Very shallow	TRUE	TRUE	TRUE	ds20
NZ Mang	NZ Mangakaware	0.15	9		175.22	-37.9333	37	New Zealand	Oceania	Subtropical	Very shallow	TRUE	TRUE	TRUE	ds20
NZ Serp	NZ Serpentine	0.05	12		175.318	-37.9503	54	New Zealand	Oceania	Subtropical	Shallow	TRUE	TRUE	TRUE	ds20
NZ Ngar	NZ Ngaroto	0.9175	3.8		175.29	-37.9521	34	New Zealand	Oceania	Subtropical	Very shallow	TRUE	TRUE	TRUE	ds20
NZ Roto	NZ Rotoehu	7.901	13		176.535	-38.0244	297	New Zealand	Oceania	Subtropical	Shallow	TRUE	TRUE	TRUE	ds20
NZ Para	NZ Parangi	0.1203	17.5		174.813	-38.0381	54	New Zealand	Oceania	Subtropical	Deep	FALSE	FALSE	FALSE	ds20
NZ Roto	NZ Rotoiti	33.691	126	25	176.336	-38.0487	270	New Zealand	Oceania	Subtropical	Deep	TRUE	TRUE	TRUE	ds20
NZ Roto	NZ Rotoma	3.8	83		176.591	-38.0578	318	New Zealand	Oceania	Subtropical	Deep	TRUE	TRUE	FALSE	ds20
NZ Roto	NZ Rotorua	80.479	25	10	176.283	-38.0686	270	New Zealand	Oceania	Subtropical	Deep	TRUE	TRUE	TRUE	ds20
NZ Okat	NZ Okataina	10.728	78		176.424	-38.1149	302	New Zealand	Oceania	Subtropical	Deep	TRUE	TRUE	TRUE	ds20
NZ Kore	NZ Korekai	0.0235	4.9		175.951	-38.1275	315	New Zealand	Oceania	Subtropical	Very shallow	TRUE	TRUE	FALSE	ds20
NZ Okar	NZ Okareka	3.341	34		176.358	-38.1674	344	New Zealand	Oceania	Subtropical	Deep	TRUE	TRUE	TRUE	ds20
NZ Numi	NZ Numiti	0.1576	10.6		174.729	-38.1782	11	New Zealand	Oceania	Subtropical	Very shallow	FALSE	FALSE	FALSE	ds20
NZ Tiki	NZ Tikitapu	1.442	27		176.33	-38.1971	414	New Zealand	Oceania	Subtropical	Deep	TRUE	TRUE	TRUE	ds20
NZ Tara	NZ Tarawera	41.154	83	45	176.424	-38.1997	278	New Zealand	Oceania	Subtropical	Deep	TRUE	TRUE	TRUE	ds20
NZ Hari	NZ Harihari	0.18	8		174.723	-38.2116	16	New Zealand	Oceania	Subtropical	Very shallow	TRUE	TRUE	FALSE	ds20
NZ Roto	NZ Rotomahana	0.438	29		176.439	-38.266	278	New Zealand	Oceania	Subtropical	Deep	TRUE	TRUE	TRUE	ds20
NZ Rere	NZ Rerewhakaaitu	5.17	14		176.501	-38.2897	439	New Zealand	Oceania	Subtropical	Shallow	TRUE	TRUE	TRUE	ds20
NZ Okar	NZ Okaro	0.301	18		176.394	-38.3003	420	New Zealand	Oceania	Subtropical	Deep	TRUE	TRUE	TRUE	ds20
NZ Ngah	NZ Ngahewa	0.084	6.7		176.374	-38.3148	413	New Zealand	Oceania	Subtropical	Very shallow	FALSE	FALSE	FALSE	ds20
NZ Tuta	NZ Tutaeinanga	0.031	8.2		176.323	-38.3333	492	New Zealand	Oceania	Subtropical	Very shallow	TRUE	TRUE	TRUE	ds20
NZ Taup	NZ Taupo	622	162.8	110	175.97	-38.7783	356	New Zealand	Oceania	Subtropical	Deep	TRUE	TRUE	TRUE	ds20
NZ Ngan	NZ Ngangana	0.22			174.244	-39.0111	11	New Zealand	Oceania	Subtropical		FALSE	FALSE	FALSE	ds20
NZ Roto	NZ Rotopounamu	0.8504	8.8		175.733	-39.0256	719	New Zealand	Oceania	Subtropical	Very shallow	FALSE	FALSE	FALSE	ds20
Whakaki	Whakaki Lake	4.749	1.5		177.557	-39.0456	20	New Zealand	Oceania	Subtropical	Very shallow	TRUE	TRUE	TRUE	ds20
NZ Opou	NZ Opouahi	0.058	19.04		176.836	-39.1464	485	New Zealand	Oceania	Subtropical	Deep	TRUE	TRUE	TRUE	ds20
NZ Tuti	NZ Tutira	1.7	50		176.898	-39.225	160	New Zealand	Oceania	Subtropical	Deep	TRUE	TRUE	TRUE	ds20
NZ Waik	NZ Waikopiro	0.1	16		176.896	-39.2344	169	New Zealand	Oceania	Subtropical	Shallow	TRUE	TRUE	TRUE	ds20
NZ Orak	NZ Orakai	0.33	23		176.888	-39.2361	168	New Zealand	Oceania	Subtropical	Deep	TRUE	TRUE	TRUE	ds20
NZ Roto	NZ Rotokare	0.157	11.6		174.408	-39.454	192	New Zealand	Oceania	Subtropical	Shallow	FALSE	FALSE	FALSE	ds20
NZ Roto	NZ Rotorangi	5.973	60		174.57	-39.5413	83	New Zealand	Oceania	Subtropical	Deep	TRUE	TRUE	TRUE	ds20
NZ West	NZ Westmere	0.081	6.2		174.999	-39.8958	96	New Zealand	Oceania	Subtropical	Very shallow	FALSE	FALSE	FALSE	ds20
NZ Koha	NZ Kohata	0.05	14.8		175.081	-39.972	45	New Zealand	Oceania	Subtropical	Shallow	FALSE	FALSE	FALSE	ds20
NZ Wiri	NZ Wiritoa	0.22	19.1		175.09	-39.9737	51	New Zealand	Oceania	Subtropical	Deep	TRUE	TRUE	TRUE	ds20
NZ Paur	NZ Pauri	0.192	14.2		175.101	-39.9783	58	New Zealand	Oceania	Subtropical	Shallow	TRUE	TRUE	TRUE	ds20
NZ Waip	NZ Waipu	0.07	4.3		175.156	-40.044	20	New Zealand	Oceania	Temperate	Very shallow	FALSE	FALSE	FALSE	ds20
NZ Dudd	NZ Dudding	0.078	7.3		175.28	-40.1	92	New Zealand	Oceania	Temperate	Very shallow	TRUE	TRUE	FALSE	ds20
NZ Heat	NZ Heaton	0.144	5		175.289	-40.1067	97	New Zealand	Oceania	Temperate	Very shallow	TRUE	TRUE	TRUE	ds20
NZ Koit	NZ Koitiata	0.096	1.6		175.196	-40.1186	18	New Zealand	Oceania	Temperate	Very shallow	FALSE	FALSE	FALSE	ds20
NZ Will	NZ William	0.068	9.8		175.311	-40.1229	105.8	New Zealand	Oceania	Temperate	Very shallow	FALSE	FALSE	FALSE	ds20
NZ Alic	NZ Alice	0.12	3.5		175.332	-40.1341	116	New Zealand	Oceania	Temperate	Very shallow	FALSE	FALSE	FALSE	ds20
NZ Herb	NZ Herbert	0.047	3.4		175.297	-40.1362	89	New Zealand	Oceania	Temperate	Very shallow	FALSE	FALSE	FALSE	ds20
Omanuka	Omanuka Lagoon	0.11	1		175.325	-40.3276	27	New Zealand	Oceania	Temperate	Very shallow	FALSE	FALSE	FALSE	ds20
Pukepuk	Pukepuke Lagoon	0.18	0.9		175.266	-40.3415	10	New Zealand	Oceania	Temperate	Very shallow	FALSE	FALSE	FALSE	ds20
NZ Kopu	NZ Koputara	0.09	1		175.262	-40.4	7	New Zealand	Oceania	Temperate	Very shallow	TRUE	TRUE	TRUE	ds20
NZ Horo	NZ Horowhenua	3.04	18		175.255	-40.6097	7	New Zealand	Oceania	Temperate	Deep	TRUE	TRUE	TRUE	ds20
NZ Wair	NZ Wairarapa	77.371	2.5		175.168	-41.2821	1	New Zealand	Oceania	Temperate	Very shallow	TRUE	TRUE	TRUE	ds20
NZ Onok	NZ Onoke	6.22	8		175.139	-41.3707	2	New Zealand	Oceania	Temperate	Very shallow	TRUE	TRUE	TRUE	ds20
NZ Haup	NZ Haupiri	2.238	18.5		171.689	-42.5667	176	New Zealand	Oceania	Temperate	Deep	TRUE	TRUE	TRUE	ds20
NZ Brun	NZ Brunner	40.61	109	32	171.501	-42.6116	3	New Zealand	Oceania	Temperate	Deep	TRUE	TRUE	TRUE	ds20
NZ Brun	NZ Brunner and NZ Grey	40.61	109	32	171.454	-42.6222	3	New Zealand	Oceania	Temperate	Deep	TRUE	TRUE	TRUE	ds20
NZ Sumn	NZ Sumner	13.73	135		172.19	-42.7001	505	New Zealand	Oceania	Temperate	Deep	FALSE	FALSE	FALSE	ds20
NZ Katr	NZ Katrine	0.78	28		172.2	-42.718	520	New Zealand	Oceania	Temperate	Deep	FALSE	FALSE	FALSE	ds20
NZ Shep	NZ Sheppard	1.09	25		172.252	-42.7613	582	New Zealand	Oceania	Temperate	Deep	FALSE	FALSE	FALSE	ds20
NZ Tayl	NZ Taylor	2.07	40		172.237	-42.7696	579	New Zealand	Oceania	Temperate	Deep	FALSE	FALSE	FALSE	ds20
St Anne	St Annes Lagoon	0.161	1.2		173.269	-42.7806	40	New Zealand	Oceania	Temperate	Very shallow	TRUE	TRUE	TRUE	ds20
NZ Sara	NZ Sarah	0.22	7		171.776	-43.0482	575	New Zealand	Oceania	Temperate	Very shallow	FALSE	FALSE	FALSE	ds20
NZ Gras	NZ Grasmere	0.624	14		171.776	-43.0625	589	New Zealand	Oceania	Temperate	Shallow	FALSE	FALSE	FALSE	ds20
NZ Pear	NZ Pearson	2.019	17.5		171.782	-43.0993	603	New Zealand	Oceania	Temperate	Deep	FALSE	FALSE	FALSE	ds20
NZ Hawd	NZ Hawdon	0.354	3.4		171.851	-43.104	571	New Zealand	Oceania	Temperate	Very shallow	FALSE	FALSE	FALSE	ds20
NZ Ida	NZ Ida	0.1	11.4		171.538	-43.2354	676	New Zealand	Oceania	Temperate	Shallow	FALSE	FALSE	FALSE	ds20
NZ Self	NZ Selfe	0.654	29.2		171.522	-43.2413	569	New Zealand	Oceania	Temperate	Deep	FALSE	FALSE	FALSE	ds20
NZ Cole	NZ Coleridge	36.88	200	70	171.484	-43.2861	450	New Zealand	Oceania	Temperate	Deep	FALSE	FALSE	FALSE	ds20
NZ Lynd	NZ Lyndon	0.884	18		171.704	-43.2999	826	New Zealand	Oceania	Temperate	Deep	FALSE	FALSE	FALSE	ds20
NZ Geor	NZ Georgina	0.175	11.7		171.569	-43.3177	537	New Zealand	Oceania	Temperate	Shallow	FALSE	FALSE	FALSE	ds20
NZ Hero	NZ Heron	6.945	37		171.169	-43.4843	692	New Zealand	Oceania	Temperate	Deep	FALSE	FALSE	FALSE	ds20
NZ Emil	NZ Emily	0.193	2.3		171.226	-43.5509	674	New Zealand	Oceania	Temperate	Very shallow	FALSE	FALSE	FALSE	ds20
Maori L	Maori Lake	0.095	0.8		171.168	-43.5705	627	New Zealand	Oceania	Temperate	Very shallow	FALSE	FALSE	FALSE	ds20
NZ Clea	NZ Clearwater	1.966	20		171.052	-43.6038	675	New Zealand	Oceania	Temperate	Deep	FALSE	FALSE	FALSE	ds20
NZ Camp	NZ Camp	0.44	13		171.056	-43.6147	676	New Zealand	Oceania	Temperate	Shallow	FALSE	FALSE	FALSE	ds20
NZ Emma	NZ Emma	1.668	2.3		171.107	-43.6354	640	New Zealand	Oceania	Temperate	Very shallow	FALSE	FALSE	FALSE	ds20
NZ Denn	NZ Denny	0.054	2		171.122	-43.6706	678	New Zealand	Oceania	Temperate	Very shallow	FALSE	FALSE	FALSE	ds20
NZ Elle	NZ Ellesmere	197.6	38.4	4.9	172.454	-43.7846	36	New Zealand	Oceania	Temperate	Shallow	TRUE	TRUE	TRUE	ds20
NZ Fors	NZ Forsyth	6.27	4		172.759	-43.7906	3	New Zealand	Oceania	Temperate	Very shallow	TRUE	TRUE	TRUE	ds20
Coopers	Coopers Lagoon/Muriwai	0.02	2		172.302	-43.8692	1	New Zealand	Oceania	Temperate	Very shallow	TRUE	TRUE	TRUE	ds20
NZ Alex	NZ Alexandrina	6.457	30		170.454	-43.9334	711	New Zealand	Oceania	Temperate	Deep	FALSE	FALSE	FALSE	ds20
NZ Teka	NZ Tekapo	56.6	120	40	170.528	-43.9347	686	New Zealand	Oceania	Temperate	Deep	FALSE	FALSE	FALSE	ds20
NZ Opuh	NZ Opuha	0.06			170.887	-43.9963	390	New Zealand	Oceania	Temperate		FALSE	FALSE	FALSE	ds20
NZ Puka	NZ Pukaki	172.74	70	56	170.199	-44.0963	478	New Zealand	Oceania	Temperate	Deep	FALSE	FALSE	FALSE	ds20
NZ Ohau	NZ Ohau	59.27	129		169.878	-44.2731	455	New Zealand	Oceania	Temperate	Deep	FALSE	FALSE	FALSE	ds20
NZ Midd	NZ Middleton	0.23	4		169.849	-44.2787	522	New Zealand	Oceania	Temperate	Very shallow	FALSE	FALSE	FALSE	ds20
Kelland	Kellands Pond	0.002			170.066	-44.299	579	New Zealand	Oceania	Temperate		TRUE	TRUE	TRUE	ds20
NZ Benm	NZ Benmore	75.85	116	47	170.109	-44.5316	316	New Zealand	Oceania	Temperate	Deep	FALSE	FALSE	FALSE	ds20
NZ Hawe	NZ Hawea	151.77	384	100	169.275	-44.5453	283	New Zealand	Oceania	Temperate	Deep	TRUE	TRUE	TRUE	ds20
NZ Avie	NZ Aviemore	28.11	40	18.5	170.296	-44.6325	315	New Zealand	Oceania	Temperate	Deep	FALSE	FALSE	FALSE	ds20
NZ Wana	NZ Wanaka	204	311	100	169.098	-44.6575	234	New Zealand	Oceania	Temperate	Deep	TRUE	TRUE	TRUE	ds20
Wainono	Wainono Lagoon	4	2		171.155	-44.703	0	New Zealand	Oceania	Temperate	Very shallow	TRUE	TRUE	TRUE	ds20
NZ Haye	NZ Hayes	2.74	35		168.811	-44.9777	325	New Zealand	Oceania	Temperate	Deep	TRUE	TRUE	TRUE	ds20
NZ John	NZ Johnson	4.75	3		168.732	-45.0033	20	New Zealand	Oceania	Temperate	Very shallow	FALSE	FALSE	FALSE	ds20
NZ Duns	NZ Dunstan	26.4	37	22	169.219	-45.0376	275	New Zealand	Oceania	Temperate	Deep	TRUE	TRUE	TRUE	ds20
NZ Waka	NZ Wakatipu	298.29	380	229	168.67	-45.0607	310	New Zealand	Oceania	Temperate	Deep	TRUE	TRUE	TRUE	ds20
NZ Te A	NZ Te Anau	342.96	417	120	167.696	-45.408	169	New Zealand	Oceania	Temperate	Deep	TRUE	TRUE	TRUE	ds20
NZ Mana	NZ Manapouri	141.78	444	220	167.485	-45.5271	142	New Zealand	Oceania	Temperate	Deep	TRUE	TRUE	TRUE	ds20
NZ Onsl	NZ Onslow	3.8	10		169.597	-45.5523	694	New Zealand	Oceania	Temperate	Very shallow	TRUE	TRUE	TRUE	ds20
NZ Waih	NZ Waihola	6.08	2		170.093	-46.0209	12	New Zealand	Oceania	Temperate	Very shallow	TRUE	TRUE	TRUE	ds20
Waiau L	Waiau Lagoon	1.4			167.644	-46.2117	0	New Zealand	Oceania	Temperate		TRUE	TRUE	TRUE	ds20
NZ Tuak	NZ Tuakitoto	1.32	1		169.833	-46.2401	21	New Zealand	Oceania	Temperate	Very shallow	TRUE	TRUE	TRUE	ds20
NZ Geor	NZ George	0.908	0.8		167.865	-46.3595	10	New Zealand	Oceania	Temperate	Very shallow	TRUE	TRUE	TRUE	ds20
Waituna	Waituna Lagoon	13.589	5	1.5	168.588	-46.5789	2	New Zealand	Oceania	Temperate	Very shallow	TRUE	TRUE	TRUE	ds20
NZ Vinc	NZ Vincent	0.172	6.3		168.831	-46.5965	19	New Zealand	Oceania	Temperate	Very shallow	TRUE	TRUE	TRUE	ds20
The Res	The Reservoir	0.48	5		169.049	-46.6586	9	New Zealand	Oceania	Temperate	Very shallow	TRUE	TRUE	TRUE	ds20
Blel	Blelham	0.11	14.5	6.8	-2.97661	54.3966	47	UK	Europe	Temperate	Deep	TRUE	TRUE	TRUE	ds21
Bass	Bassenthwaite	5.24	19	5	-3.22712	54.6681	68	UK	Europe	Temperate	Deep	TRUE	TRUE	TRUE	ds22
Derw	Derwent Water	5.29	22	5.5	-3.1468	54.5769	76	UK	Europe	Temperate	Deep	FALSE	FALSE	FALSE	ds23
Esth	Esthwaite	0.96	15.5	6.4	-2.98625	54.3632	65	UK	Europe	Temperate	Deep	TRUE	TRUE	TRUE	ds24
Gras	Grasmere	0.61	21.5	7.7	-3.0209	54.4492	61	UK	Europe	Temperate	Deep	TRUE	TRUE	TRUE	ds25
Wind	Windermere	14.36	64	21.3	-2.95348	54.4017	37	UK	Europe	Temperate	Deep	TRUE	TRUE	TRUE	ds26
Biwa	Biwa	670	104	44	136.171	35.3456	84	Japan	Asia	Subtropical	Deep	TRUE	TRUE	TRUE	ds27
Mika	Mikata	3.6	5.8		135.884	35.5652	0	Japan	Asia	Subtropical	Very shallow	TRUE	TRUE	TRUE	ds27
Erke	Erken	24.2	21	9	18.6258	59.8403	9.7	Sweden	Europe	Temperate	Deep	TRUE	TRUE	TRUE	ds28
Inba	Inba	11.5	2.5	1.7	140.252	35.8	0	Japan	Asia	Subtropical	Very shallow	TRUE	TRUE	TRUE	ds29
Magg	Maggiore	212.5	372	177.4	8.62956	45.9432	193	Italy	Europe	Temperate	Deep	TRUE	TRUE	TRUE	ds30
I1	I1	0.182	10.4	3.89	-149.586	68.5684	785	USA	North America	Frigid	Shallow	TRUE	FALSE	FALSE	ds31
I2	I2	0.084	18.2	7.24	-149.565	68.571	785	USA	North America	Frigid	Deep	TRUE	FALSE	FALSE	ds31
I3	I3	0.032	4.9	1.83	-149.584	68.5747	774	USA	North America	Frigid	Very shallow	TRUE	FALSE	FALSE	ds31
I4	I4	0.087	7.8	2.98	-149.58	68.5789	774	USA	North America	Frigid	Very shallow	TRUE	FALSE	FALSE	ds31
I5	I5	0.21	10.5	3.87	-149.59	68.5876	770	USA	North America	Frigid	Shallow	TRUE	FALSE	FALSE	ds31
I6	I6	0.181	15.8	5.63	-149.595	68.5959	754	USA	North America	Frigid	Deep	TRUE	FALSE	FALSE	ds31
I7	I7	0.03	13.1	3.67	-149.596	68.6006	742	USA	North America	Frigid	Shallow	TRUE	FALSE	FALSE	ds31
I8	I8	0.163	9.1	2.54	-149.59	68.6097	744	USA	North America	Frigid	Very shallow	TRUE	FALSE	FALSE	ds31
ISwamp	ISwamp	0.019	5.5	2.71	-149.601	68.6108	736	USA	North America	Frigid	Very shallow	FALSE	FALSE	FALSE	ds31
LTER345	LTER345	0.313	28.6	12.33	-149.151	68.6228	862	USA	North America	Frigid	Deep	FALSE	FALSE	FALSE	ds31
E1	E1	0.029	11	2.89	-149.556	68.6262	762	USA	North America	Frigid	Very shallow	FALSE	FALSE	FALSE	ds31
S06	S06	0.011	8.5	2.02	-149.642	68.6294	731	USA	North America	Frigid	Very shallow	FALSE	FALSE	FALSE	ds31
Toolik	Toolik	1.48	26.2	8.13	-149.613	68.63	719	USA	North America	Frigid	Deep	TRUE	TRUE	TRUE	ds31
S11	S11	0.004	13.1	3.61	-149.651	68.6301	750	USA	North America	Frigid	Shallow	FALSE	FALSE	FALSE	ds31
S07	S07	0.008	2.9	0.82	-149.644	68.6302	731	USA	North America	Frigid	Very shallow	FALSE	FALSE	FALSE	ds31
N01	N01	0.044	14	3.92	-149.607	68.6399	731	USA	North America	Frigid	Shallow	FALSE	FALSE	FALSE	ds31
N02	N02	0.018	10.7	2.78	-149.625	68.641	724	USA	North America	Frigid	Very shallow	TRUE	FALSE	FALSE	ds31
E5	E5	0.059	12.7	6.31	-149.458	68.6426	800	USA	North America	Frigid	Deep	FALSE	FALSE	FALSE	ds31
E6	E6	0.019	3.2	1.61	-149.44	68.6435	792	USA	North America	Frigid	Very shallow	FALSE	FALSE	FALSE	ds31
NE9B	NE9B	0.004	6		-149.599	68.6526	747	USA	North America	Frigid		FALSE	FALSE	FALSE	ds31
NE12	NE12	0.85	14	3.92	-149.623	68.6621	699	USA	North America	Frigid	Shallow	FALSE	FALSE	FALSE	ds31
Fog03	Fog03	0.041	21	7.81	-149.088	68.6727	792	USA	North America	Frigid	Deep	FALSE	FALSE	FALSE	ds31
NE14	NE14	0.24	15		-149.63	68.6767	701	USA	North America	Frigid		FALSE	FALSE	FALSE	ds31
Fog05	Fog05	0.008	9.9	3.43	-149.065	68.6785	750	USA	North America	Frigid	Shallow	FALSE	FALSE	FALSE	ds31
Fog02	Fog02	0.059	20.3	7.75	-149.092	68.6792	785	USA	North America	Frigid	Deep	FALSE	FALSE	FALSE	ds31
Fog04	Fog04	0.019	4.8	2.07	-149.076	68.6798	754	USA	North America	Frigid	Very shallow	FALSE	FALSE	FALSE	ds31
Fog01	Fog01	0.036	19.8	8.34	-149.082	68.6835	770	USA	North America	Frigid	Deep	FALSE	FALSE	FALSE	ds31
ODL	Oneida	206	17	6.7	-75.9228	43.2103	112	USA	North America	Temperate	Deep	TRUE	TRUE	TRUE	ds32
Mu-T	Mu-Tan				120.783	22.1404		China	Asia	Tropical		TRUE	TRUE	TRUE	ds33
Feng	Feng-Shan				120.392	22.5406		China	Asia	Tropical		TRUE	TRUE	TRUE	ds33
Chen	Cheng-Ching-Hu				120.348	22.6618		China	Asia	Tropical		TRUE	TRUE	TRUE	ds33
A-Ku	A-Kung-Tien				120.353	22.8119		China	Asia	Tropical		TRUE	TRUE	TRUE	ds33
Chin	Ching-Mien				120.488	23.0583		China	Asia	Tropical		TRUE	TRUE	TRUE	ds33
Nan-	Nan-Hua				120.555	23.1068		China	Asia	Tropical		TRUE	TRUE	TRUE	ds33
Wu-S	Wu-Shan-Tou				120.382	23.2071		China	Asia	Tropical		TRUE	TRUE	TRUE	ds33
Chi-	Chi-Mei				119.435	23.2117		China	Asia	Tropical		TRUE	TRUE	TRUE	ds33
Tsen	Tseng-Wen				120.553	23.2636		China	Asia	Tropical		TRUE	TRUE	TRUE	ds33
Pai-	Pai-Ho				120.479	23.3621		China	Asia	Tropical		TRUE	TRUE	TRUE	ds33
Hsi-	Hsi-An				119.497	23.3646		China	Asia	Tropical		TRUE	TRUE	TRUE	ds33
Jen-	Jen-Yi-Tan				120.51	23.4656		China	Asia	Tropical		TRUE	TRUE	TRUE	ds33
Lan-	Lan-Tan				120.479	23.4708		China	Asia	Tropical		TRUE	TRUE	TRUE	ds33
Hsin	Hsing-Jen				119.604	23.5501		China	Asia	Subtropical		TRUE	TRUE	TRUE	ds33
Tung	Tung-Wei				119.598	23.5678		China	Asia	Subtropical		TRUE	TRUE	TRUE	ds33
Chen	Cheng-Kung				119.626	23.5775		China	Asia	Subtropical		TRUE	TRUE	TRUE	ds33
Hsia	Hsiao-Chih				119.509	23.6109		China	Asia	Subtropical		TRUE	TRUE	TRUE	ds33
Tou-	Tou-She				120.897	23.8367		China	Asia	Subtropical		TRUE	TRUE	TRUE	ds33
Jih-	Jih-Yueh-Tan				120.927	23.847		China	Asia	Subtropical		TRUE	TRUE	TRUE	ds33
Jin-	Jin-hu				120.91	23.8503		China	Asia	Subtropical		TRUE	TRUE	TRUE	ds33
Wu-S	Wu-She				121.136	23.9928		China	Asia	Subtropical		TRUE	TRUE	TRUE	ds33
Te-C	Te-Chi				121.206	24.262		China	Asia	Subtropical		TRUE	TRUE	TRUE	ds33
Li-Y	Li-Yu-Tan				120.79	24.3411		China	Asia	Subtropical		TRUE	TRUE	TRUE	ds33
Hsi-	Hsi-Hu				118.231	24.435		China	Asia	Subtropical		TRUE	TRUE	TRUE	ds33
Tai-	Tai-Hu				118.427	24.44		China	Asia	Subtropical		TRUE	TRUE	TRUE	ds33
Ling	Ling-Hu				118.244	24.4469		China	Asia	Subtropical		TRUE	TRUE	TRUE	ds33
Chiu	Chiung-Lin				118.372	24.4487		China	Asia	Subtropical		TRUE	TRUE	TRUE	ds33
Lien	Lien-Hu				118.25	24.4501		China	Asia	Subtropical		TRUE	TRUE	TRUE	ds33
Ian-	Ian-hu				118.381	24.452		China	Asia	Subtropical		TRUE	TRUE	TRUE	ds33
Yang	Yang-Ming-Hu				118.432	24.4596		China	Asia	Subtropical		TRUE	TRUE	TRUE	ds33
Chin	Ching-Tien				118.398	24.4628		China	Asia	Subtropical		TRUE	TRUE	TRUE	ds33
Tien	Tien-Pu				118.455	24.4741		China	Asia	Subtropical		TRUE	TRUE	TRUE	ds33
Jung	Jung-Hu				118.41	24.4865		China	Asia	Subtropical		TRUE	TRUE	TRUE	ds33
Chin	Chin-Sha				118.403	24.4912		China	Asia	Subtropical		TRUE	TRUE	TRUE	ds33
Shan	Shan-Hsi				118.427	24.5056		China	Asia	Subtropical		TRUE	TRUE	TRUE	ds33
Ming	Ming-Te				120.889	24.5871		China	Asia	Subtropical		TRUE	TRUE	TRUE	ds33
Yung	Yung-Ho-Shan				120.932	24.6548		China	Asia	Subtropical		TRUE	TRUE	TRUE	ds33
Ta-P	Ta-Pu				120.984	24.6759		China	Asia	Subtropical		TRUE	TRUE	TRUE	ds33
Bao-	Bao-Er				121.044	24.7195		China	Asia	Subtropical		TRUE	TRUE	TRUE	ds33
Pao-	Pao-Shan				121.056	24.7462		China	Asia	Subtropical		TRUE	TRUE	TRUE	ds33
Shih	Shih-Men				121.252	24.8114		China	Asia	Subtropical		TRUE	TRUE	TRUE	ds33
Fei-	Fei-Tsui	10.2	250.035	90	121.623	24.9245	170	China	Asia	Subtropical	Deep	TRUE	TRUE	TRUE	ds33
Hsi-	Hsi-Shih				121.727	25.0894		China	Asia	Subtropical		TRUE	TRUE	TRUE	ds33
Hsin	Hsin-Shan				121.71	25.1306		China	Asia	Subtropical		TRUE	TRUE	TRUE	ds33
Fu-J	Fu-Jheng				119.978	25.9664		China	Asia	Subtropical		TRUE	TRUE	TRUE	ds33
CaiP	CaiPuWo				119.943	25.9772		China	Asia	Subtropical		TRUE	TRUE	TRUE	ds33
Le-D	Le-Dao-Wo				119.931	25.9801		China	Asia	Subtropical		TRUE	TRUE	TRUE	ds33
Tie-	Tie-Bao				119.921	26.1429		China	Asia	Subtropical		TRUE	TRUE	TRUE	ds33
Shen	Sheng-Li				119.936	26.1526		China	Asia	Subtropical		TRUE	TRUE	TRUE	ds33
Chu-	Chu-Shui-Wo				119.917	26.1535		China	Asia	Subtropical		TRUE	TRUE	TRUE	ds33
Jhu-	Jhu-Luo				119.928	26.1581		China	Asia	Subtropical		TRUE	TRUE	TRUE	ds33
Hou-	Hou-Wo				119.921	26.1606		China	Asia	Subtropical		TRUE	TRUE	TRUE	ds33
Chio	Chiou-Guei-Shan				119.925	26.1674		China	Asia	Subtropical		TRUE	TRUE	TRUE	ds33
Wu-S	Wu-Sha				119.984	26.2192		China	Asia	Subtropical		TRUE	TRUE	TRUE	ds33
Jhon	Jhong-Sing				119.992	26.2206		China	Asia	Subtropical		TRUE	TRUE	TRUE	ds33
Fan-	Fan-Li				119.974	26.2218		China	Asia	Subtropical		TRUE	TRUE	TRUE	ds33
Ciao	Ciao-Zai				119.993	26.2319		China	Asia	Subtropical		FALSE	FALSE	FALSE	ds33
Tung	Tung-Yung				120.492	26.3696		China	Asia	Subtropical		TRUE	TRUE	TRUE	ds33
Zih-	Zih-Wo				120.499	26.3717		China	Asia	Subtropical		TRUE	TRUE	TRUE	ds33
Hu-s	Hu-shan							China	Asia	Subtropical		TRUE	TRUE	TRUE	ds33
Jhin	Jhin-Sha							China	Asia	Subtropical		TRUE	TRUE	TRUE	ds33
Shih	Shih-Kang Dam							China	Asia	Subtropical		FALSE	FALSE	FALSE	ds33
Sant	Santa NInha		6.9	3.5	-55.4864	-2.0376	4	Brazil	South America	Tropical	Shallow	FALSE	FALSE	FALSE	ds34
Poca	Pocao		7.4	4.6	-55.6214	-2.1125	1	Brazil	South America	Tropical	Shallow	FALSE	FALSE	FALSE	ds34
Gran	Grande Pocao		7.5	4.5	-55.4888	-2.1333	1	Brazil	South America	Tropical	Shallow	FALSE	FALSE	FALSE	ds34
Pied	Piedade		5.8	4.4	-55.5981	-2.1738	1	Brazil	South America	Tropical	Shallow	FALSE	FALSE	FALSE	ds34
Salé	Salé		7.3	4.5	-55.8063	-2.1774	1	Brazil	South America	Tropical	Shallow	FALSE	FALSE	FALSE	ds34
Lago	Lago Grande		7.52	4.7	-55.2702	-2.2217	1	Brazil	South America	Tropical	Shallow	FALSE	FALSE	FALSE	ds34
Pira	Piracuará		7.4	4.4	-55.4562	-2.262	1	Brazil	South America	Tropical	Shallow	FALSE	FALSE	FALSE	ds34

## Sheet: Abbreviation
Abbreviation	Explanation
Lakeid	The abbreviation of the lake
Area_km2	The area of the lake
MaxDepth	The maximum depth of the lake
MeanDepth	The mean depth of the lake
Depth	The depth classification of the lake. For very shallow lakes, mean water depth < 3 m; for deep lakes, mean water depth > 5 m; for shallow lakes, 3 m < mean water depth < 5 m
Climate_zone	The classification by climate zone of the lake. Tropical (absolute latitude < 23.5°), subtropical (23.5° < absolute latitude < 40°), temperate (40° < absolute latitude < 66.5°) and figid (absolute latitude > 66.5°°)
Data_filtered	The dataset were filtered out (FALSE) according a series of procedures as proposed in Methods.
CCM_filtered	The dataset were filtered out (FALSE) if the pairwise time series were not convergent detected by covergent cross mapping
Chl_Loop_filtered	The dataset were filtered out (FALSE) if there were no significant feedback loops associated with Chla

## Sheet: Data_Source
Source_ID	Data.Management	Dataset.name	Suorce_web	Contact_person	Contact_Email	Application	Note
ds01	Observatory on Lakes(OLA)	The Observatory on LAkes (OLA) database: Sixty years of environmental data accessible to the public	https://si-ola.inrae.fr/si_lacs/login.jsf	Ghislaine Monet	ghislaine.monet@inrae.fr	By request;Registration required
ds02	Department of Environmental Conservation	Lake Champlain Long-Term Water Quality and Biological Monitoring Project (VT DEC)	https://dec.vermont.gov/watershed/lakes-ponds/monitor/lake-champlain-long-term-monitoring-project	Peter Isles	peter.isles@vermont.gov	Open
ds03	Danish monitoring programme on the aquatic environment, NOVANA	Danmarks Miljøportal	https://miljoedata.miljoeportal.dk	Erik Jeppesen	ej@ecos.au.dk	By request;Registration required
ds04	Chinese Ecosystem Science Data Center	湖泊水化学要素分析	http://rs.cern.ac.cn/data/meta?id=16880	Guo	cnern@igsnrr.ac.cn	Oepn, Registration required
ds05	Private dataset			Te Cao	caote@ihb.ac.cn	By request
ds06	St. Johns River Water Management District	Water quality monitoring data and reports	https://www.sjrwmd.com/data/water-quality/	Lori McCloud	lmccloud@sjrwmd.com	Open
ds07	National Institute for Environmental Studies, Japan	Kasumigaura long-term monitoring site	https://db.cger.nies.go.jp/gem/moni-e/inter/GEMS/database/kasumi/contents/datalist.html			Open	National Institute for Environmental Studies (2016) Lake Kasumigaura Database, National Institute for Environmental Studies, Japan. Accessed via https://db.cger.nies.go.jp/gem/moni-e/inter/GEMS/database/kasumi/index.html on DD-MM-YYYY.
ds08	National Institute for Environmental Studies, Japan	Lake Mashu, Long-term Environmental Monitoring	https://db.cger.nies.go.jp/gem/inter/GEMS/mashu/index_j.html			Open
ds09	Figshare	Long-term dataset on aquatic responses to concurrent climate change and recovery from acidification	https://doi.org/10.6084/m9.figshare.5686987.v2	Taylor H. Leach		Open	Leach, T., Winslow, L., Acker, F. et al. Long-term dataset on aquatic responses to concurrent climate change and recovery from acidification. Sci Data 5, 180059 (2018). https://doi.org/10.1038/sdata.2018.59
ds10	Environmental Data Initiative	North Temperate Lakes LTER: Chemical Limnology of Primary Study Lakes: Major Ions 1981 - current	https://portal.edirepository.org/nis/mapbrowse?scope=knb-lter-ntl&identifier=2			Open
ds11	Keskkonnaamet, Estonia	KESKKONNASEIRE INFOSÜSTEEM KESE	https://kese.envir.ee/kese/listParameterValueNew.action?backAction=menu			Open
ds12	Chinese Ecosystem Science Data Center	2013–2018年鄱阳湖水环境监测数据集	http://rs.cern.ac.cn/data/meta?id=142315	郭老师	nesdc@igsnrr.ac.cn	Open, Registration required
ds13	Leibniz Institute of Freshwater Ecology and Inland Fisheries (IGB)	Freshwater Research and Environmental Database	https://fred.igb-berlin.de/Studysites/byType/lake	Sabine Wollrab	sabine.wollrab@igb-berlin.de	By request/Registration required
ds14	Department of Aquatic Sciences and Assessment,Swedish University of Agricultural Sciences	National data host lakes and watercourses, and national data host agricultural land	http://webstar.vatten.slu.se/db.html			Open	Swedish University of Agricultural Sciences (SLU). National data host lakes and watercourses, and national data host agricultural land, https://miljodata.slu.se/mvm/ [yyyy-mm-dd or dd/mm/yyyy]
ds15	Environmental Protection Agency (EPA) Central Data Exchange (CDX)	GLENDA: Great Lakes Environmental Database Query System	https://cdx.epa.gov/			Open, Registration required
ds16	Ministerie van Infrastructuur en Waterstaat, The Netherlands		https://waterinfo.rws.nl/#/nav/index			Open
ds17	College of the Environment and Life Sciences, University of Rhode Island	Providing information on the water quality of surface water resources throughout Rhode Island	https://web.uri.edu/watershedwatch/data/historic-data/			Open
ds18	The Forest Ecosystem Monitoring Cooperative(FEMC)	Global Evaluation of the Impacts of Storms on freshwater Habitat and Structure of phytoplankton Assemblages (GEISHA)	https://www.uvm.edu/femc/data/archive/project/geisha-stormblitzfr/dataset			Open
ds19	King County Council,Washington,USA	Major lakes monitoring	https://green2.kingcounty.gov/lakes/			Open
ds20	Land, Air, Water Aotearoa (LAWA),New Zealand	Lake water quality dataset (2004-2022)	https://www.lawa.org.nz/download-data/#download-data-lakes			Open
ds21	Environmental Information Data Centre,UK Centre for Ecology & Hydrology	Surface temperature, surface oxygen, water clarity, water chemistry and phytoplankton chlorophyll a data from Blelham Tarn, 1945 to 2013/2014-2048	https://doi.org/10.5285/393a5946-8a22-4350-80f3-a60d753beb00			Open
ds22	Environmental Information Data Centre,UK Centre for Ecology & Hydrology	Surface temperature, surface oxygen, water clarity, water chemistry and phytoplankton chlorophyll a data from Bassenthwaite Lake, 1990 to 2013	https://doi.org/10.5285/91d763f2-978d-4891-b3c6-f41d29b45d55			Open
ds23	Environmental Information Data Centre,UK Centre for Ecology & Hydrology	Surface temperature, surface oxygen, water clarity, water chemistry and phytoplankton chlorophyll a data from Derwent Water, 1990 to 2013	https://doi.org/10.5285/106844ff-7b4c-45c3-8b4c-7cfb4a4b953b			Open
ds24	Environmental Information Data Centre,UK Centre for Ecology & Hydrology	Surface temperature, surface oxygen, water clarity, water chemistry and phytoplankton chlorophyll a data from Esthwaite Water, 1945 to 2013	https://doi.org/10.5285/87360d1a-85d9-4a4e-b9ac-e315977a52d3			Open
ds25	Environmental Information Data Centre,UK Centre for Ecology & Hydrology	Surface temperature, surface oxygen, water clarity, water chemistry and phytoplankton chlorophyll a data from Grasmere, 1968 to 2013	https://doi.org/10.5285/b891c50a-1f77-48b2-9c41-7cc0e8993c50			Open
ds26	Environmental Information Data Centre,UK Centre for Ecology & Hydrology	Surface temperature, surface oxygen, water clarity, water chemistry and phytoplankton chlorophyll a data from Windermere, 1945 to 2013	https://doi.org/10.5285/f385b60a-2a6b-432e-aadd-a9690415a0ca			Open
ds27	National Institute for Environmental Studies, Japan	UNEP GEMS/Water Program	https://db.cger.nies.go.jp/gem/inter/GEMS/gems_jnet/index_j.html			Open
ds28	The Swedish Infrastructure for Ecosystem Science	Chemical variables - lake from Erken, deepest point	https://meta.fieldsites.se/objects/E3q_b3k_gSBE58AEIiaqzXFn			Open
ds29	Chiba Prefectural Government,Japan	公共用水域及び地下水の水質測定結果	http://www.pref.chiba.lg.jp/suiho/kasentou/koukyouyousui/index.html			Open
ds30	eLTER Research Infrastructure	Dynamic Ecological Information Management System - Site and dataset registry	Water chemistry data :https://deims.org/dataset/69564188-89de-4879-ad88-4aa97c1d005d Chla data :https://deims.org/dataset/c857c8e2-48aa-4dcd-a7fb-e089bd4c5c4e			Open
ds31	The Arctic Long Term Ecological Research, USA	Arctic Data Catalog	https://arc-lter.ecosystems.mbl.edu/arctic-data-catalog			Open	Also in Environmental Data Initiative (EDI)
ds32	The Knowledge Network for Biocomplexity (KNB)	Limnological data and depth profile from Oneida Lake, New York, 1975 to present	https://knb.ecoinformatics.org/view/kgordon.35.117			Open
ds33	Minstry of Environment,Taiwan Province, China	Reservoir water quality monitoring data	https://data.moenv.gov.tw/dataset?p=1&size=10&sort=&topic_name=%E6%B0%B4&tags=%E6%B0%B4%E5%BA%AB%E6%B0%B4%E8%B3%AA			Open
ds34	L’ entrepôt de données DataSuds	Surface water quality (2013-2017) - Curuai floodplain, Brazil, Pará	https://dataverse.ird.fr/dataset.xhtml?persistentId=doi:10.23708/SNGQHV			Open	Roque, D.D., et,al., (2023) Surface water quality in Amazonian Floodplain Lakes, data set of the Lago Grande de Curuai Floodplain Lake, Pará-Brazil. Geoscience Data Journal, 00, 1–15
